# Supplementary material for: Genome of the Netherlands population-specific imputations identify an ABCA6 variant associated with cholesterol levels
Source: PubMed Central journal article supplement (PMC4366498; doi:10.1038/ncomms7065), 2015-03-09
Supplement: ncomms7065-s1.pdf [file ncomms7065-s1.pdf]

## Supplementary figures

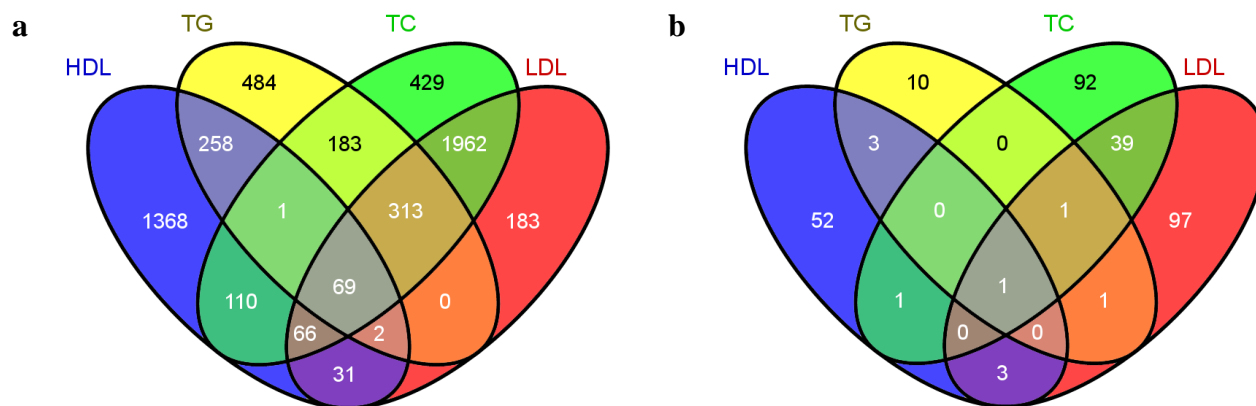

**Supplementary Figure 1.** The overlap between (a) the genome-wide significant ( $p$ -value  $< 5 \cdot 10^{-8}$ ) SNPs per trait and (b) the independently associated SNPs per trait.

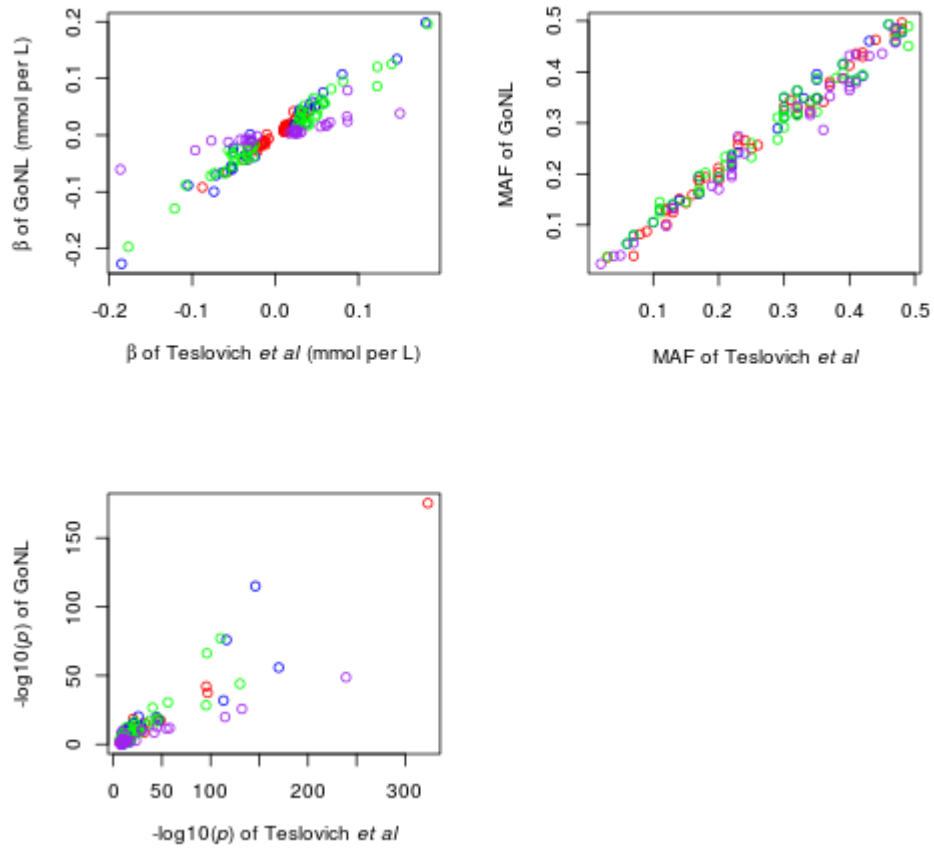

**Supplementary Figure 2. The confirmation of the results of Teslovich *et al.*<sup>[1]</sup> in the meta-analysis of the discovery cohorts.**

The red circles are the HDL loci, the blue circles are the LDL loci, the green circles are the TC loci and the purple circles are the TG loci.

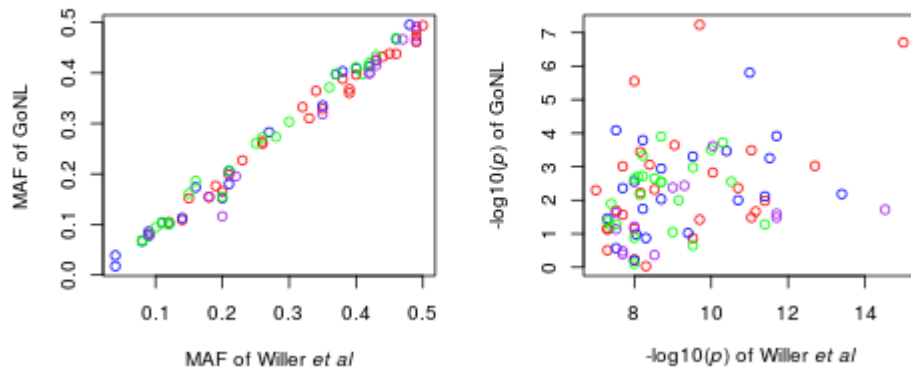

**Supplementary Figure 3. The confirmation of the results of Willer *et al.*<sup>[2]</sup> in the meta-analysis of the discovery cohorts.**

The red circles are the HDL loci, the blue circles are the LDL loci, the green circles are the TC loci and the purple circles are the TG loci.

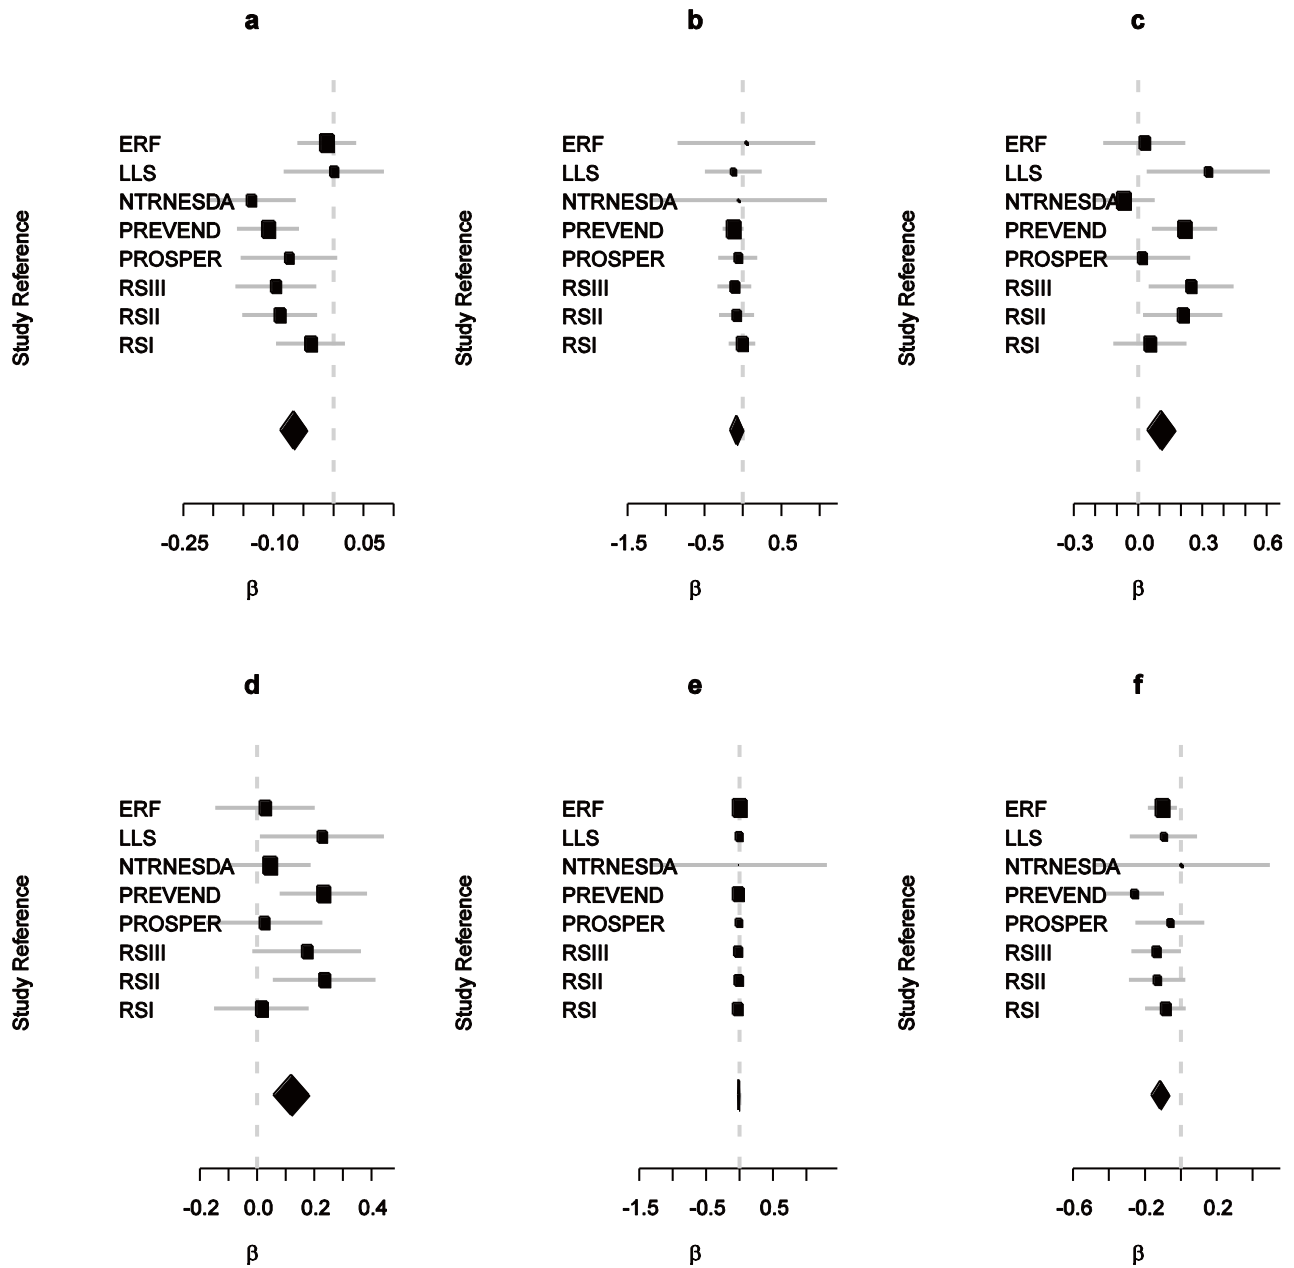

**Supplementary Figure 4. The forestplot of all potential novel loci after the conditional analysis within the discovery cohorts.**

a: HDL, chromosome 11, position 47,907,641.

b: HDL, chromosome 17, position 41,874,745.

c: LDL, chromosome 17, position 67,081,278.

d: TC, chromosome 17, position 67,081,278.

e: TC, chromosome 19, position 20,479,901.

f: TG, chromosome 19, position 8,627,569.

Plotted SNPs

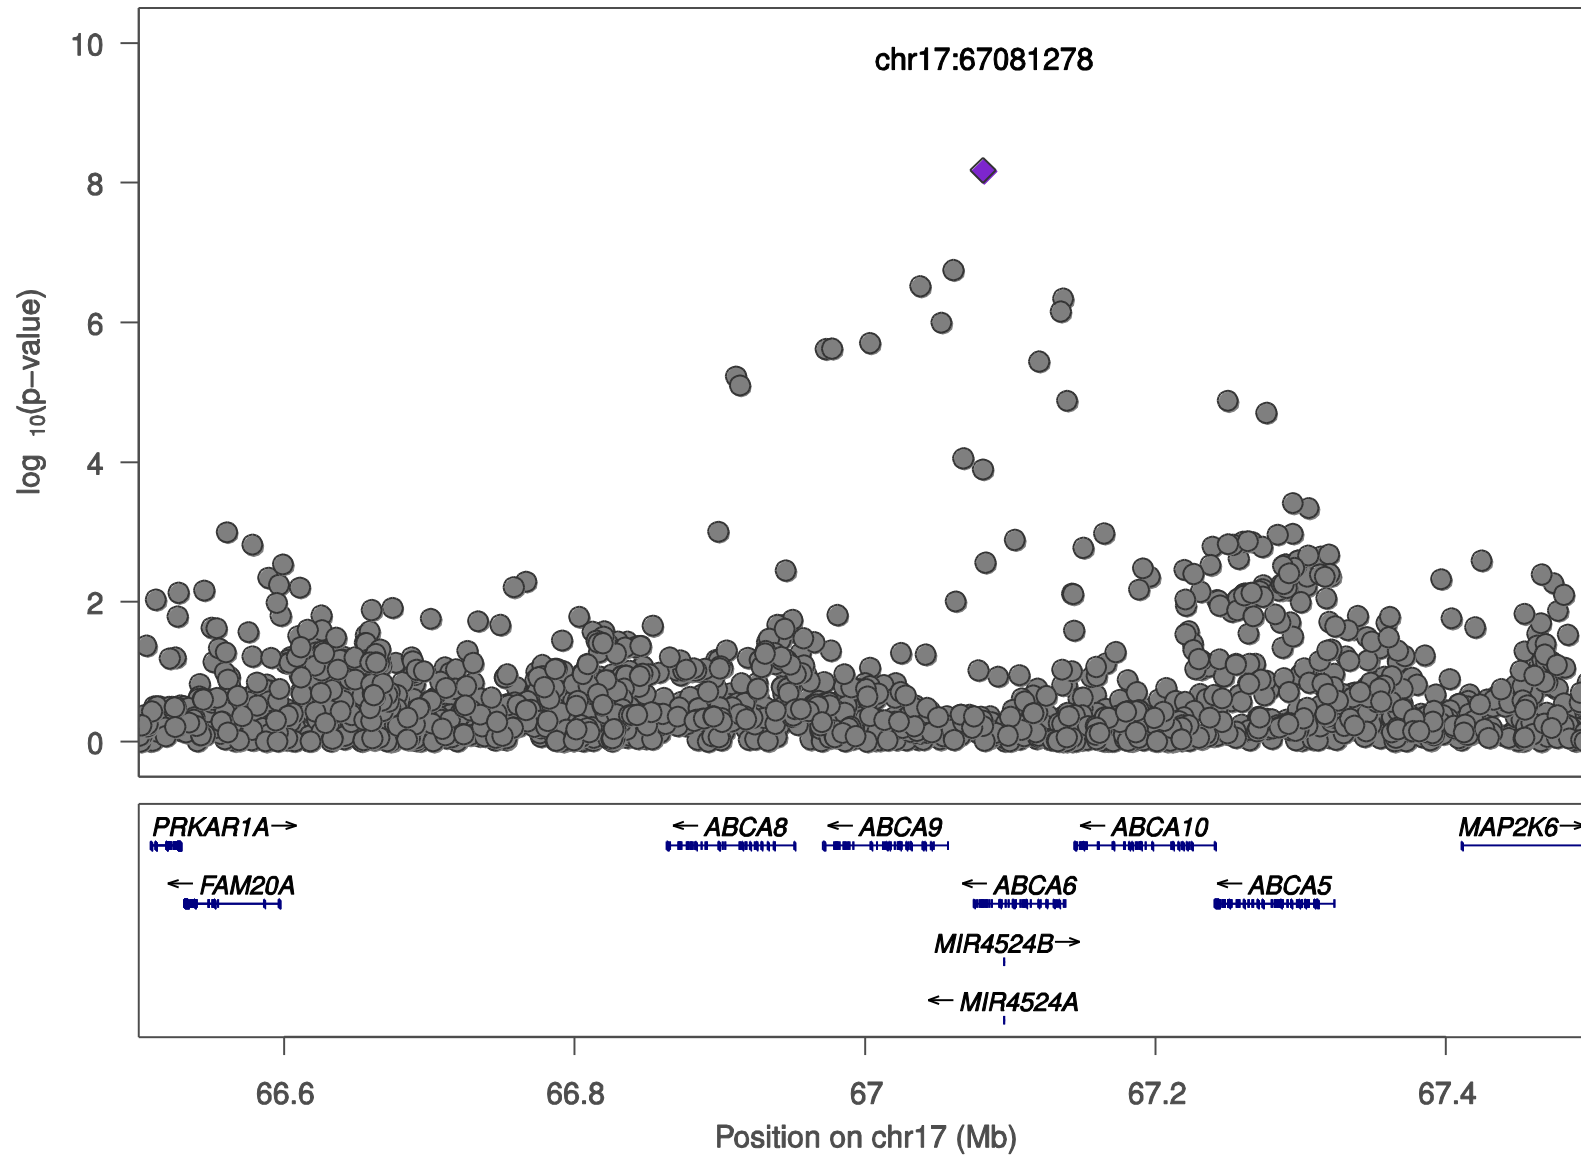

Supplementary Figure 5. The regional association results of the initial meta-analysis of all discovery cohorts for LDL on chromosome 17.

Plotted SNPs

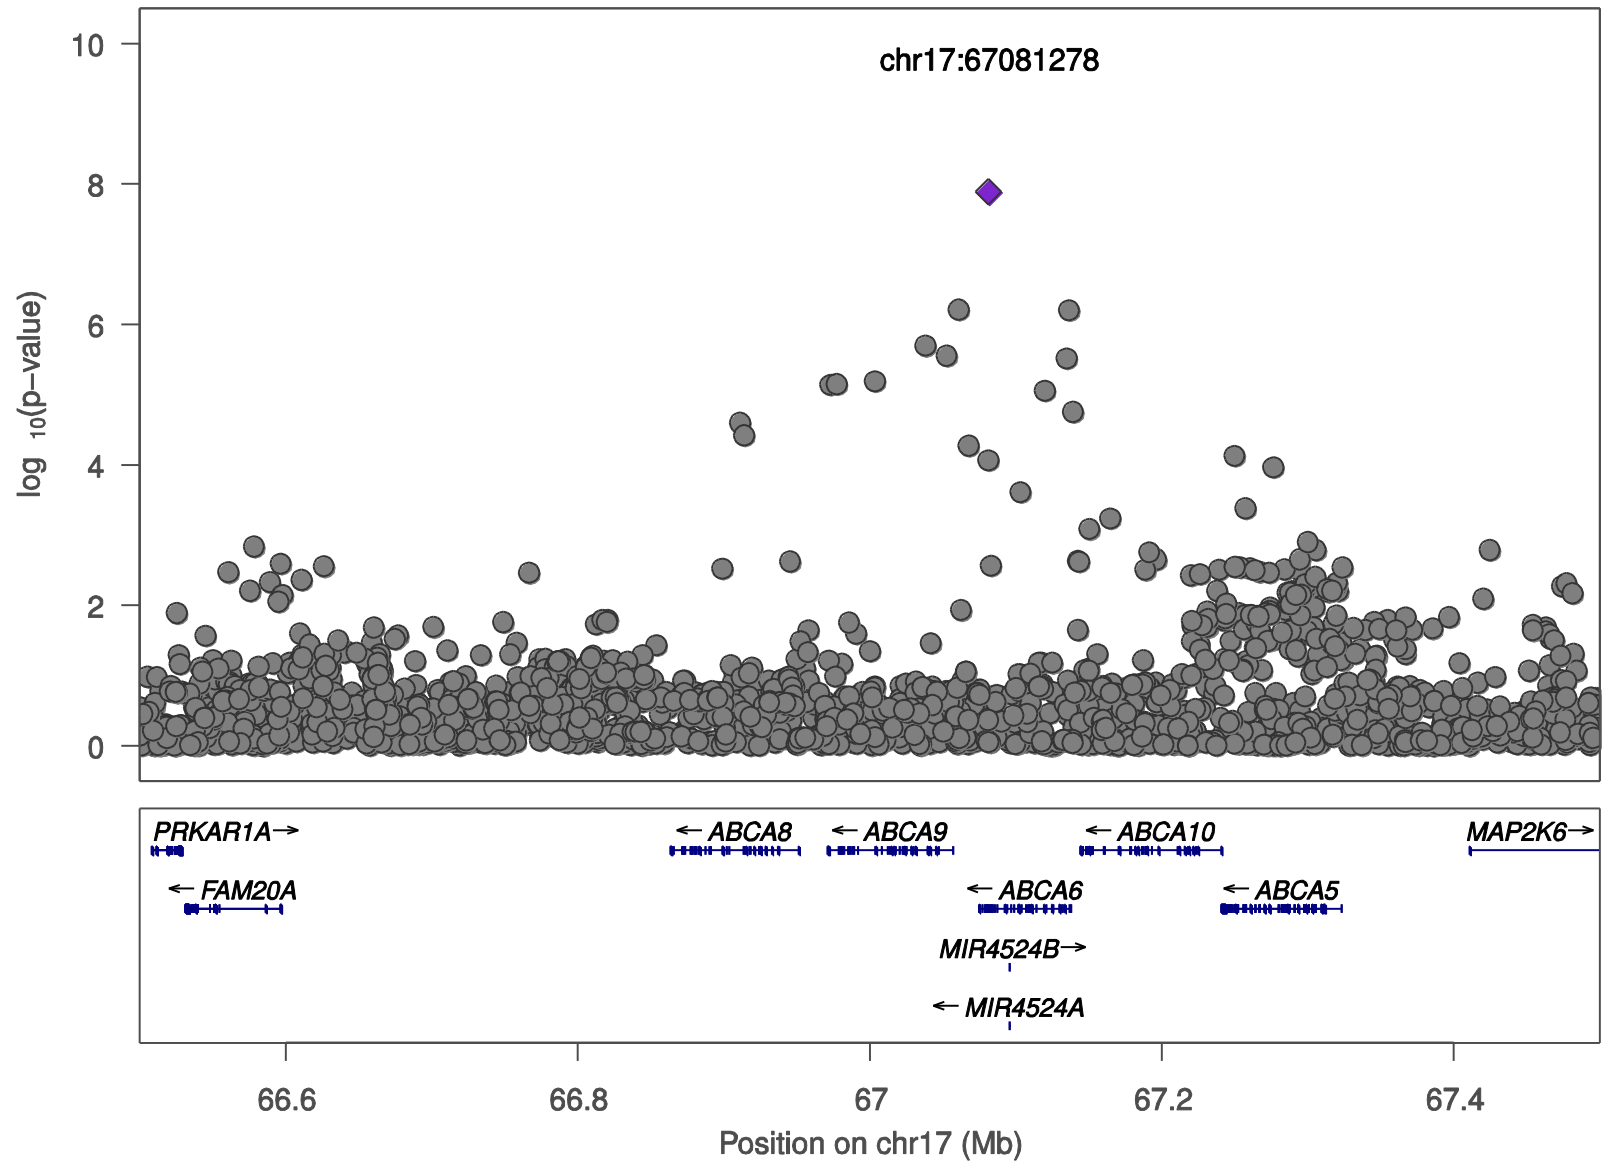

Supplementary Figure 6. The regional association results of the initial meta-analysis of all discovery cohorts for TC on chromosome 17.

Plotted SNPs

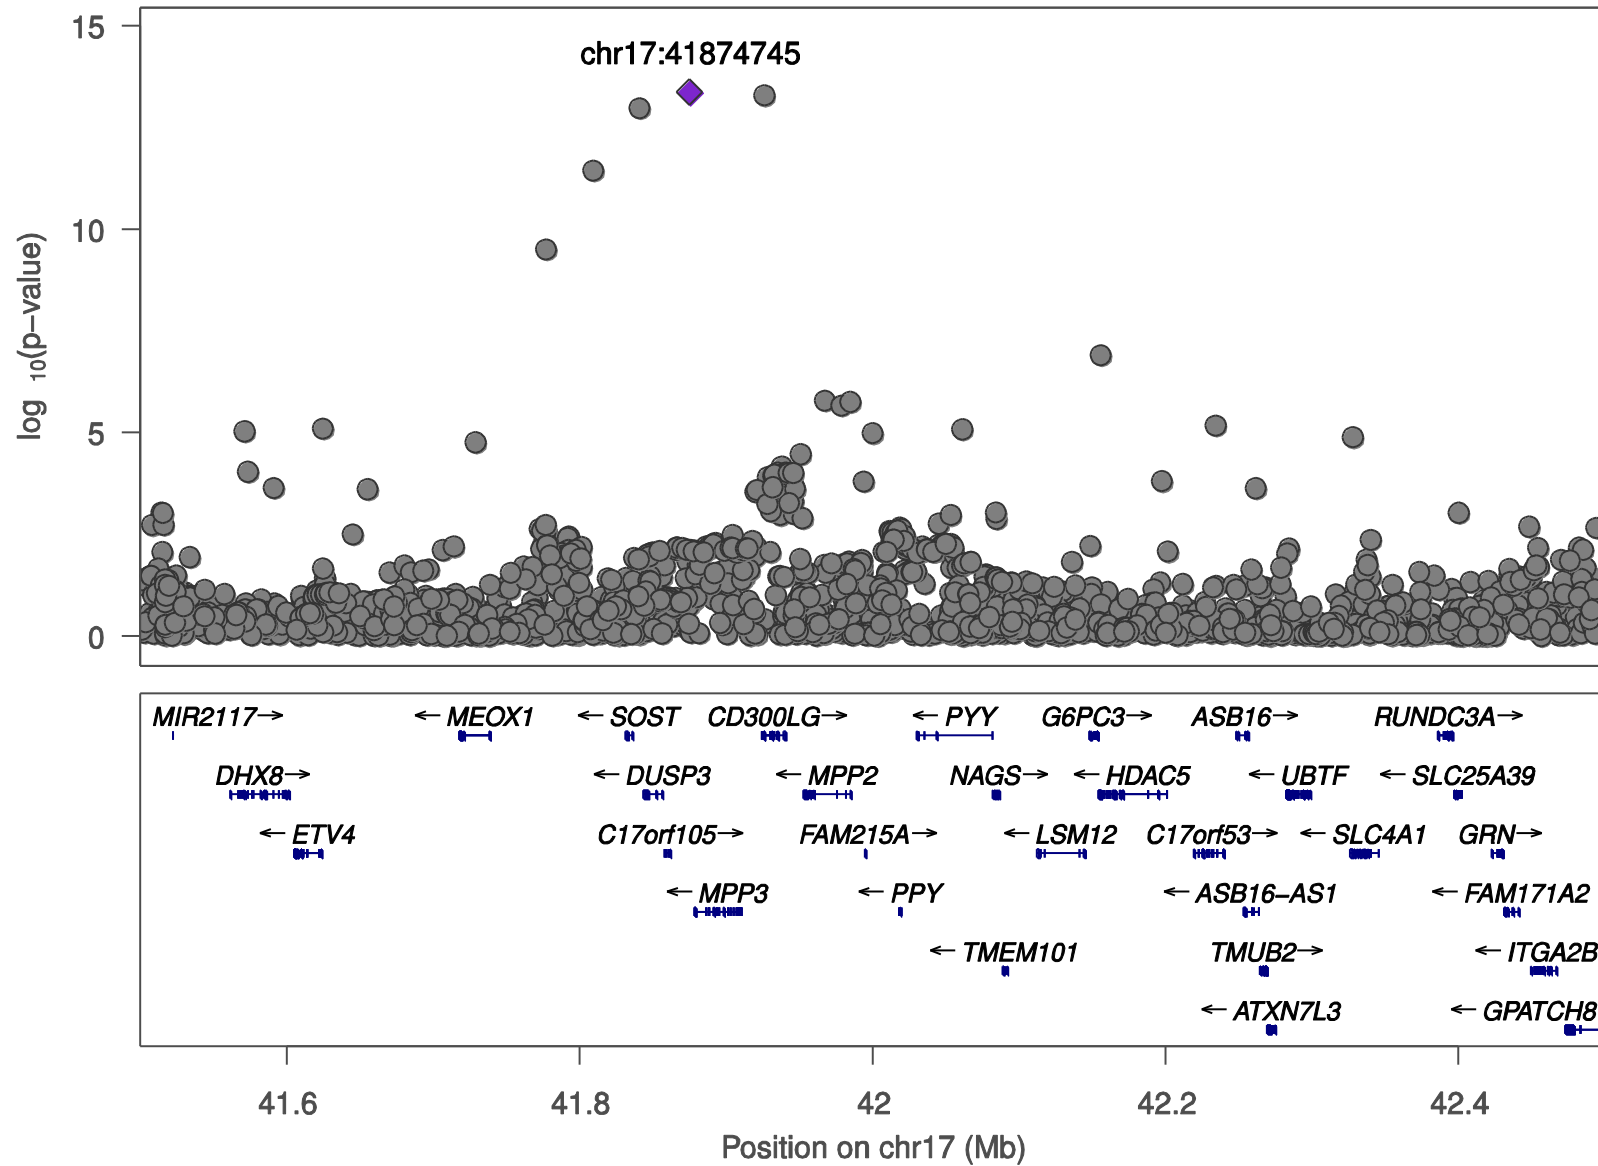

Supplementary Figure 7. The regional association results of the initial meta-analysis of all discovery cohorts for HDL on chromosome 17.

Plotted SNPs

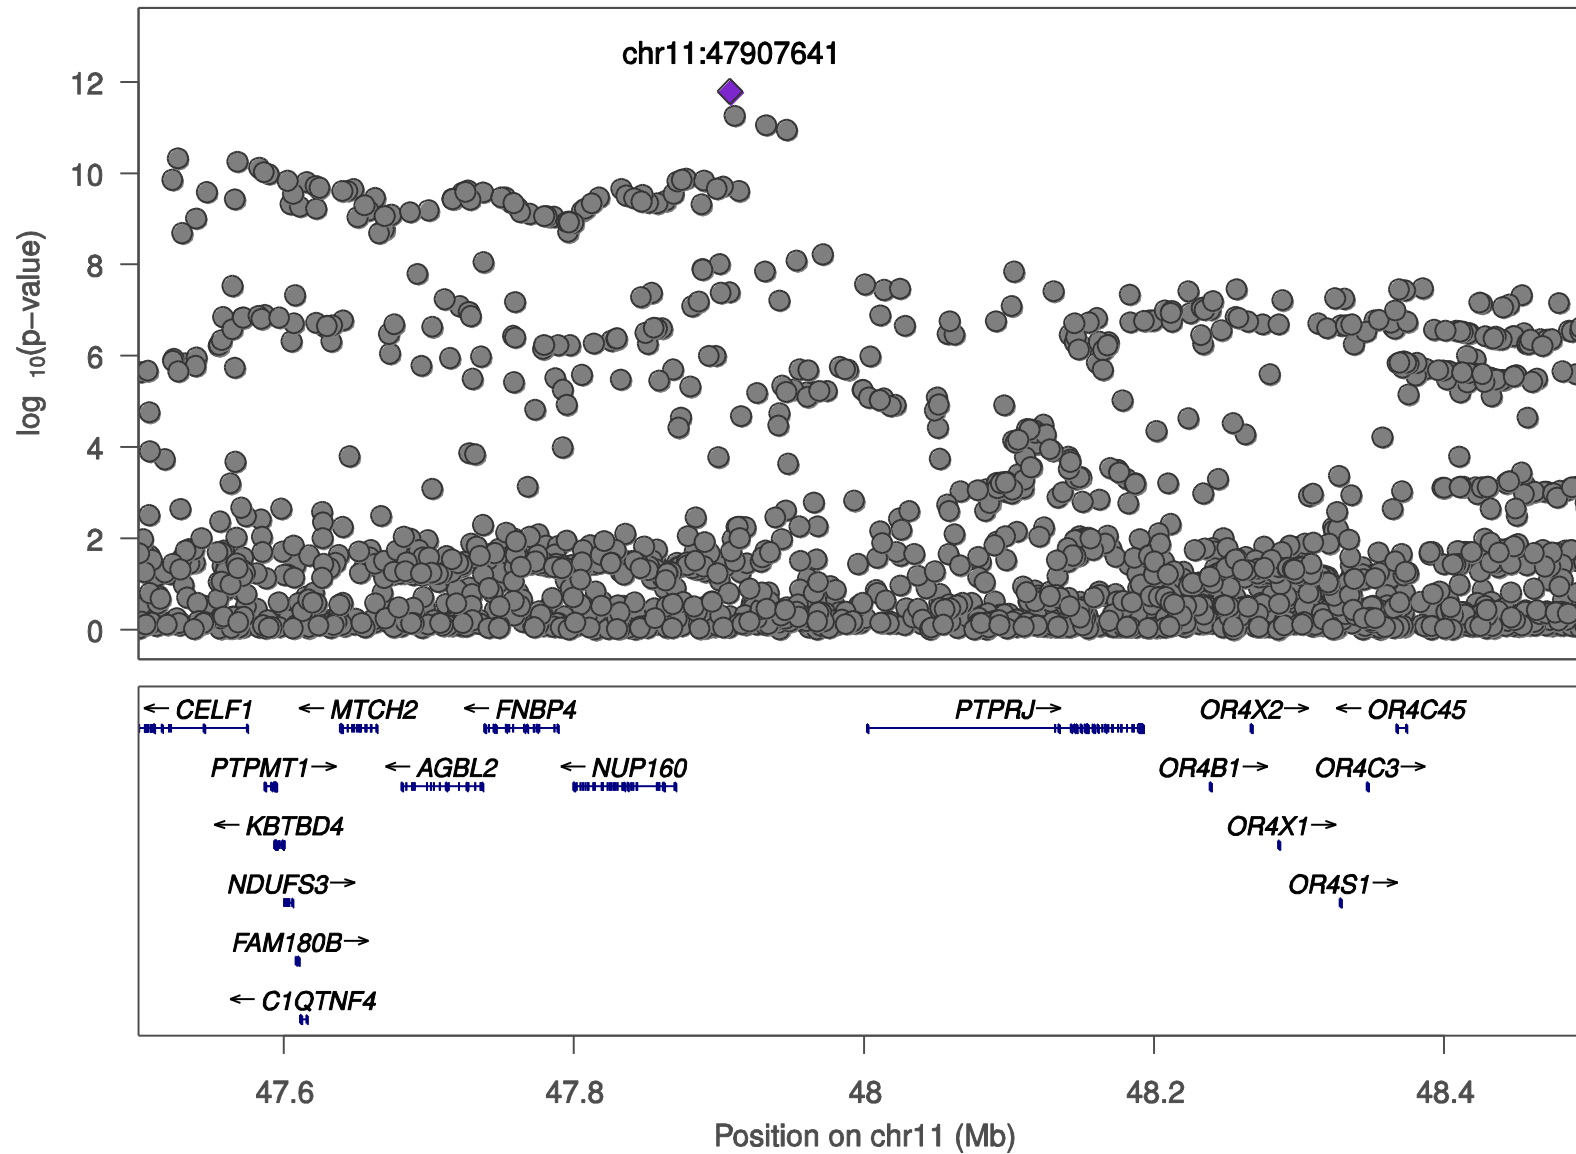

Supplementary Figure 8. The regional association results of the initial meta-analysis of all discovery cohorts for HDL on chromosome 11.



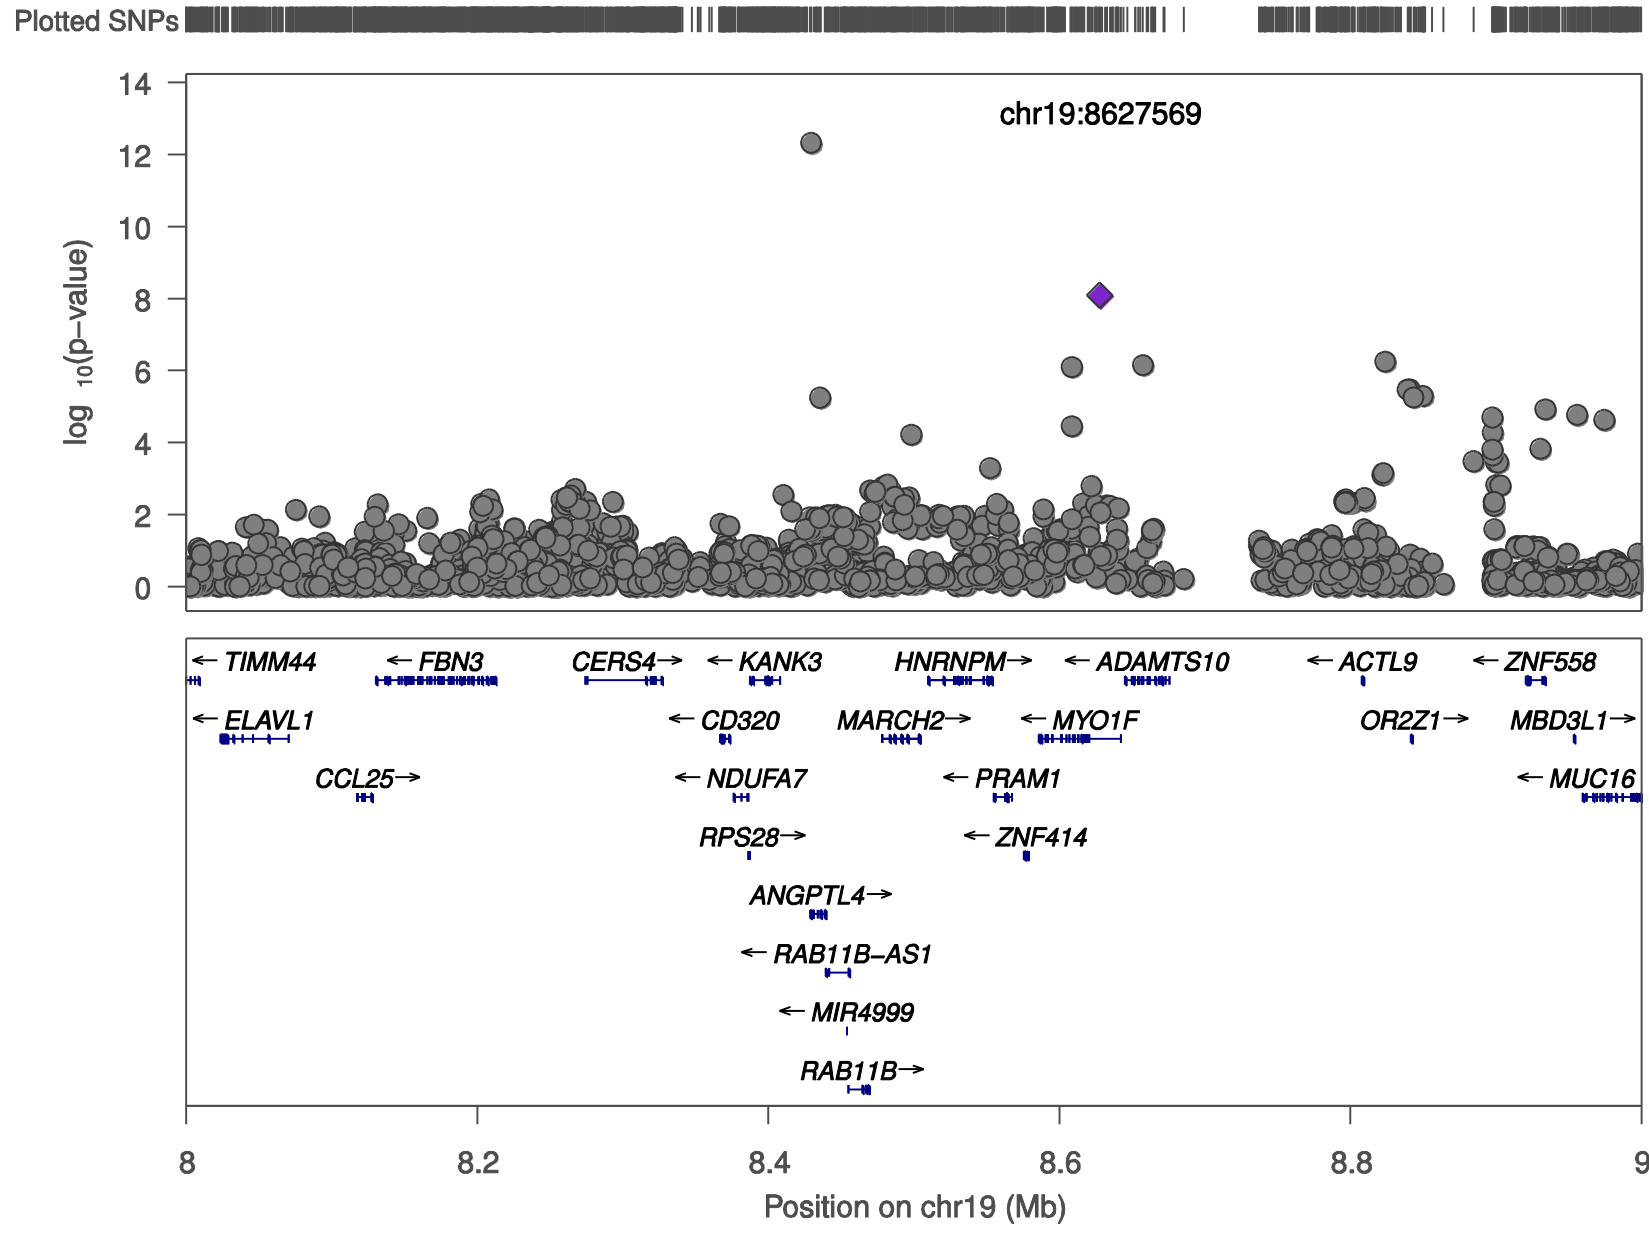

Supplementary Figure 9. The regional association results of the initial meta-analysis of all discovery cohorts for TG on chromosome 19.

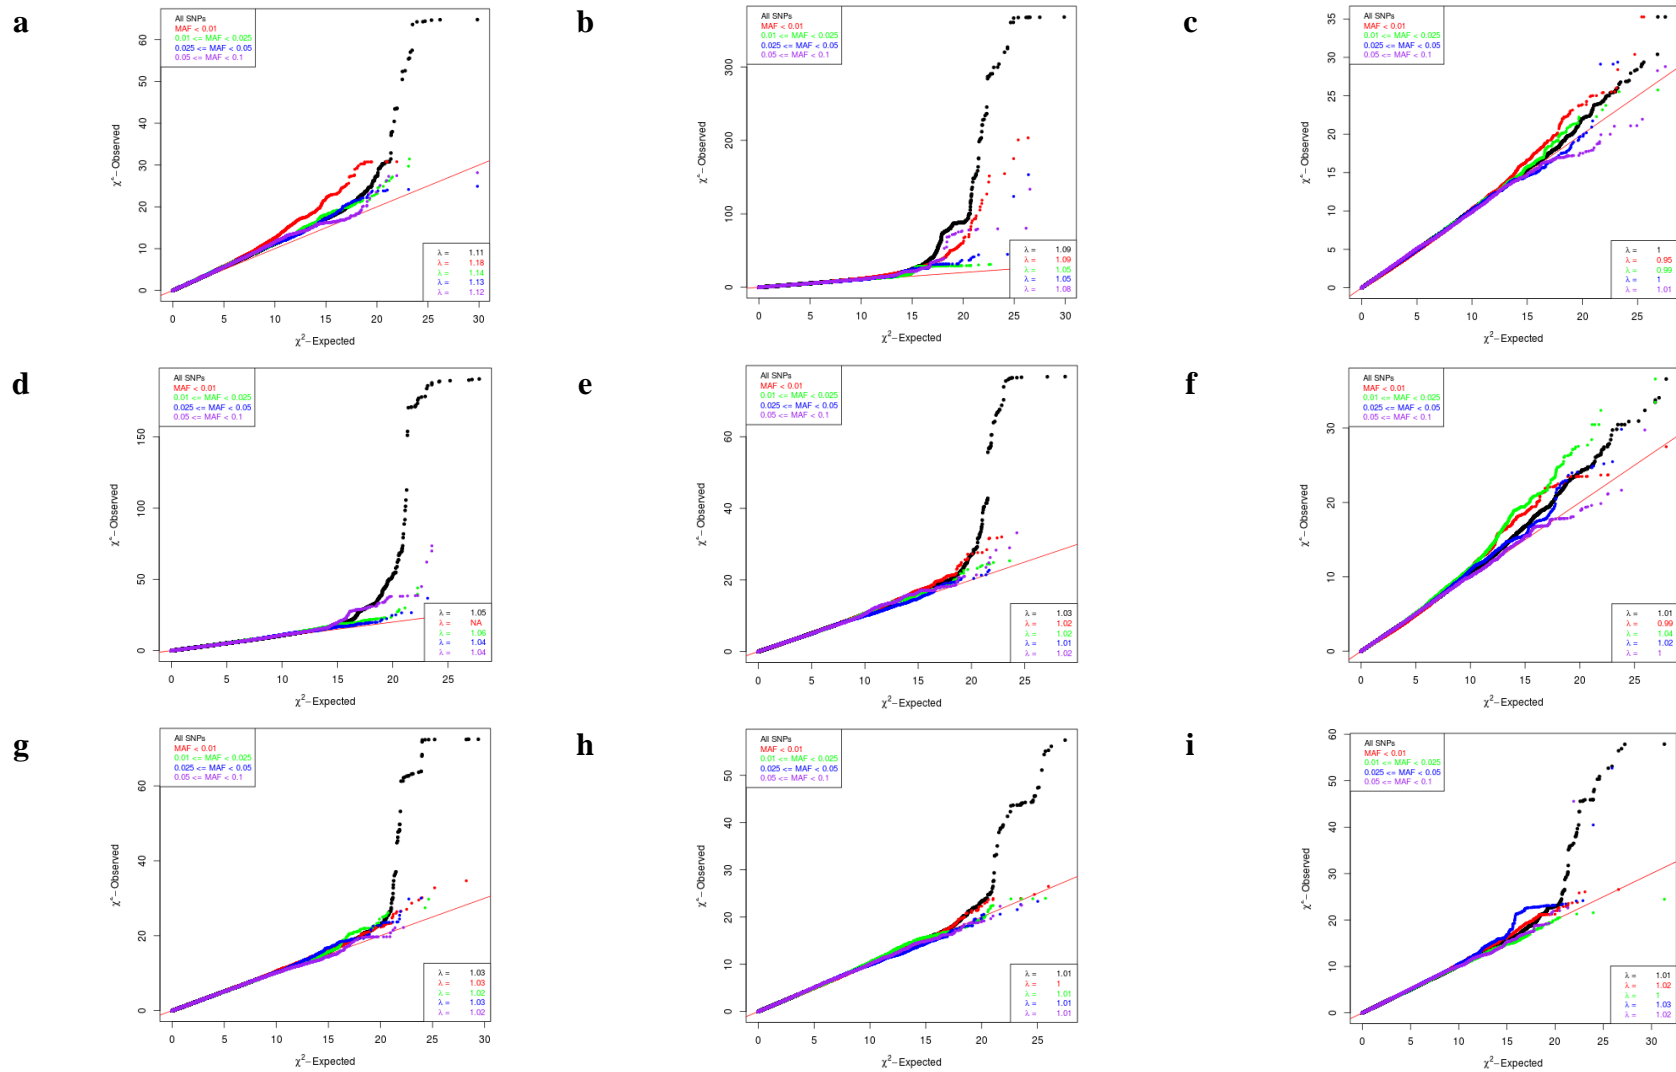

**Supplementary Figure 10. The QQ plot for HDL per cohort after removing those SNPs which do not have association results or did not meet the QC thresholds.**

a: ERF, b: Lifelines, c: LLS, d: NTR-NESDA, e: PREVEND, f: PROSPER, g: RS-I, h: RS-II and i: RS-III.

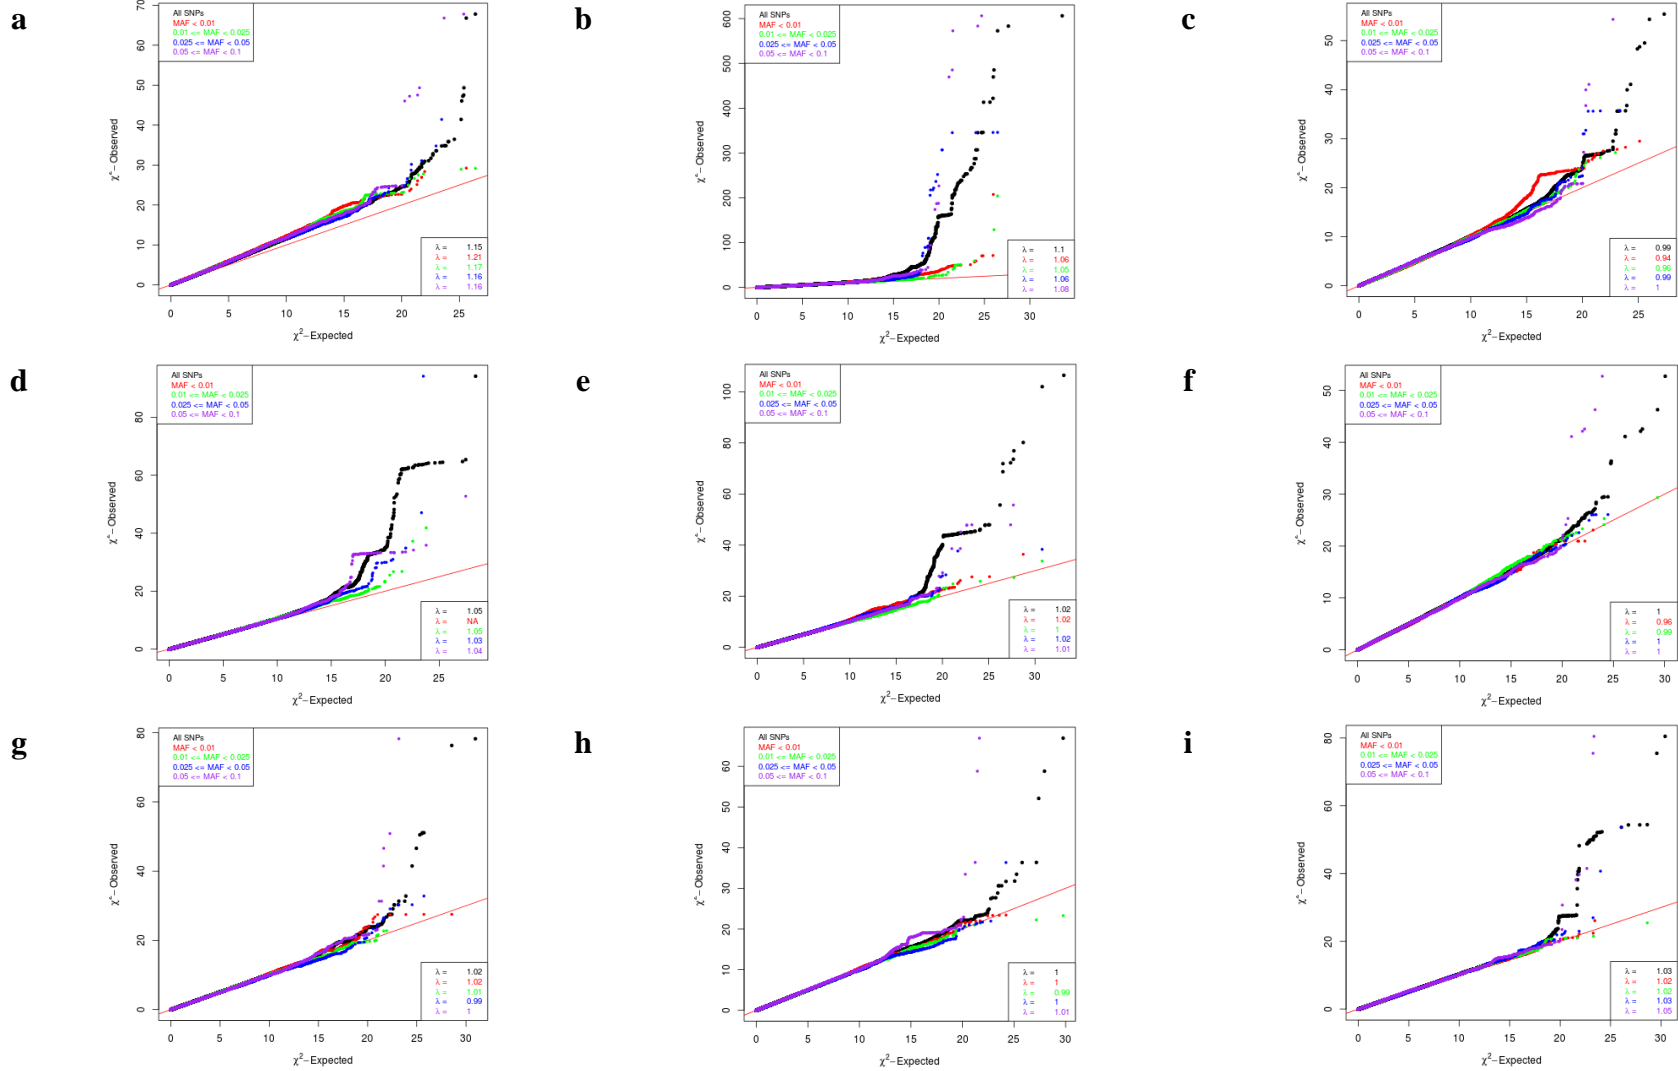

**Supplementary Figure 11. The QQ plot for LDL per cohort after removing those SNPs which do not have association results or did not meet the QC thresholds.**

a: ERF, b: Lifelines, c: LLS, d: NTR-NESDA, e: PREVEND, f: PROSPER, g: RS-I, h: RS-II and i: RS-III.

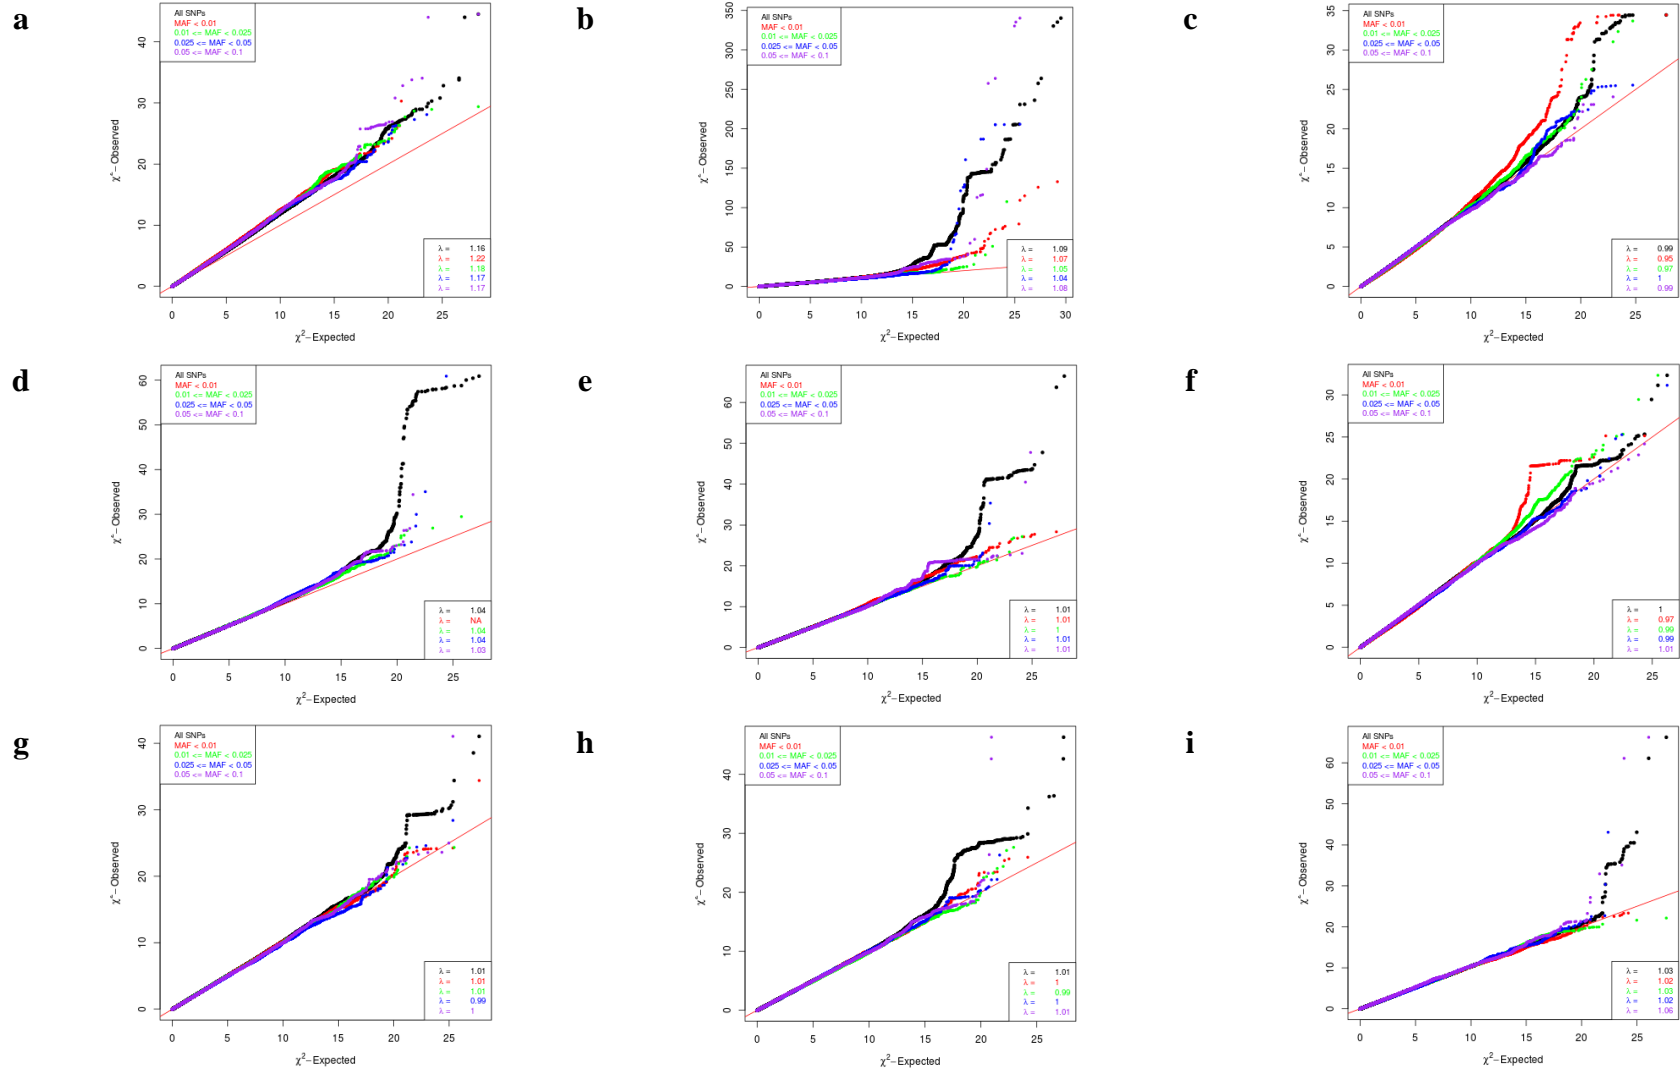

**Supplementary Figure 12. The QQ plot for TC per cohort after removing those SNPs which do not have association results or did not meet the QC thresholds.**

a: ERF, b: Lifelines, c: LLS, d: NTR-NESDA, e: PREVEND, f: PROSPER, g: RS-I, h: RS-II and i: RS-III.

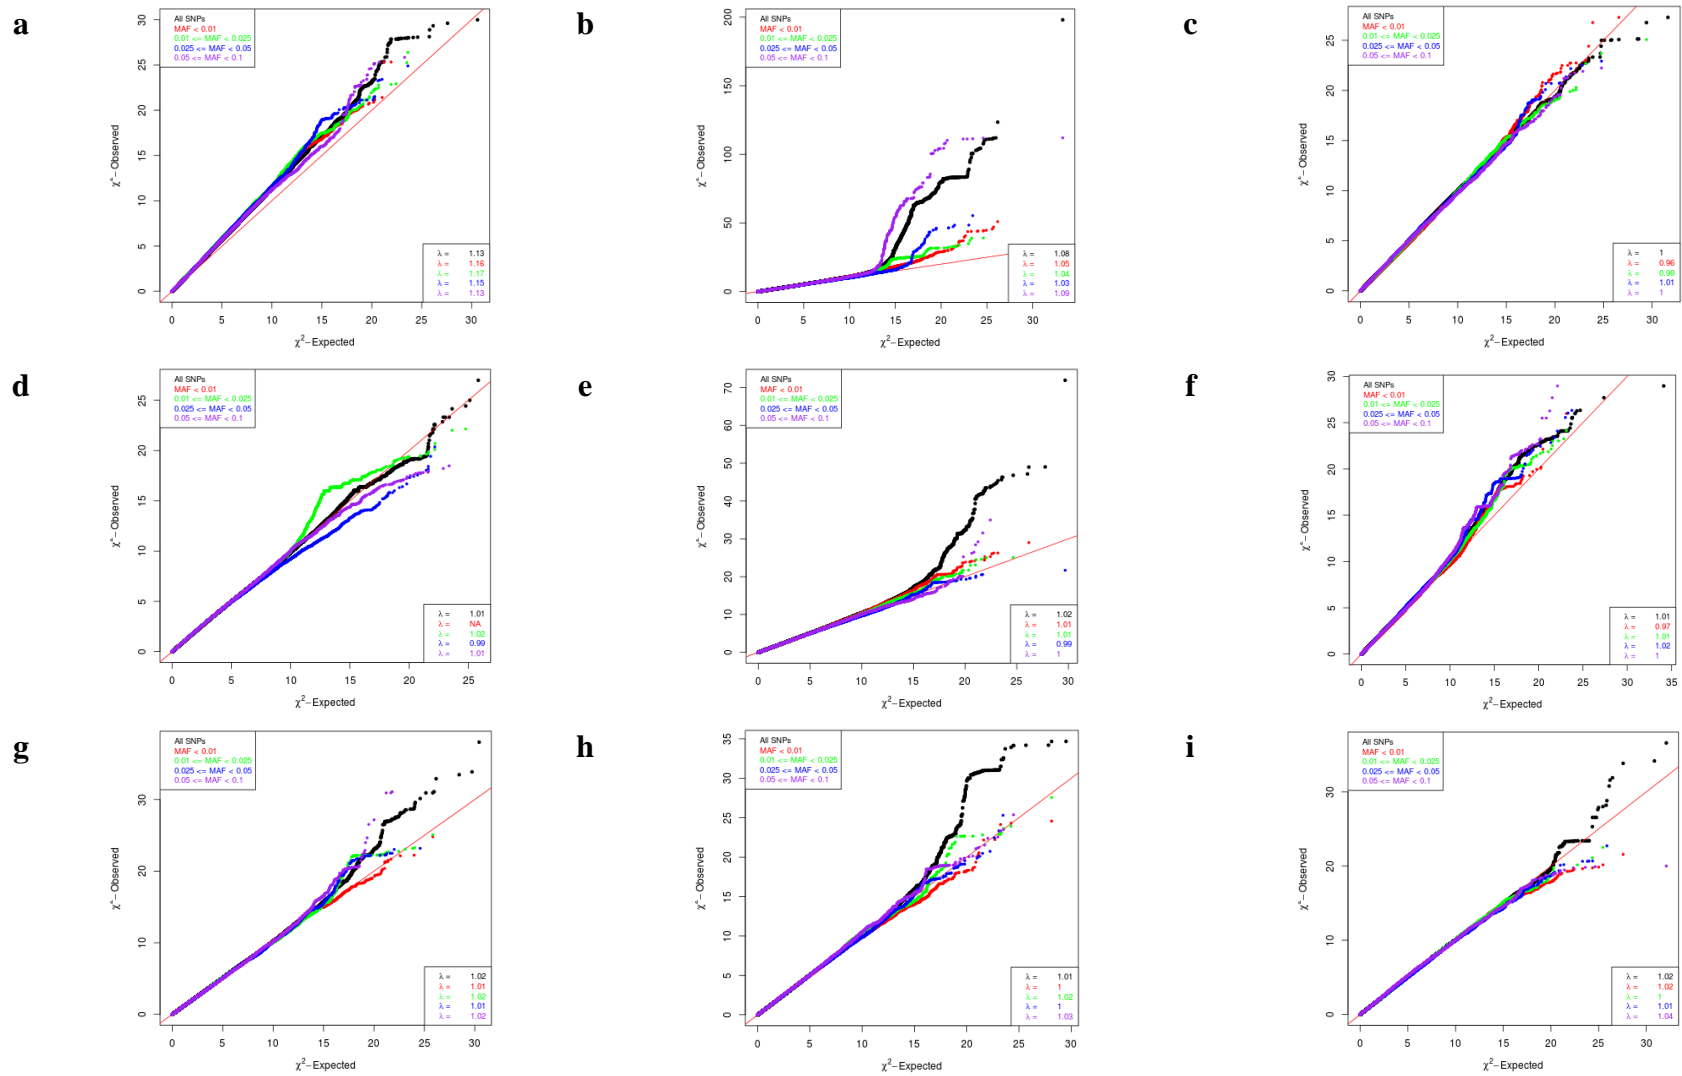

**Supplementary Figure 13. The QQ plot for TG per cohort after removing those SNPs which do not have association results or did not meet the QC thresholds.**

a: ERF, b: Lifelines, c: LLS, d: NTR-NESDA, e: PREVEND, f: PROSPER, g: RS-I, h: RS-II and i: RS-III.

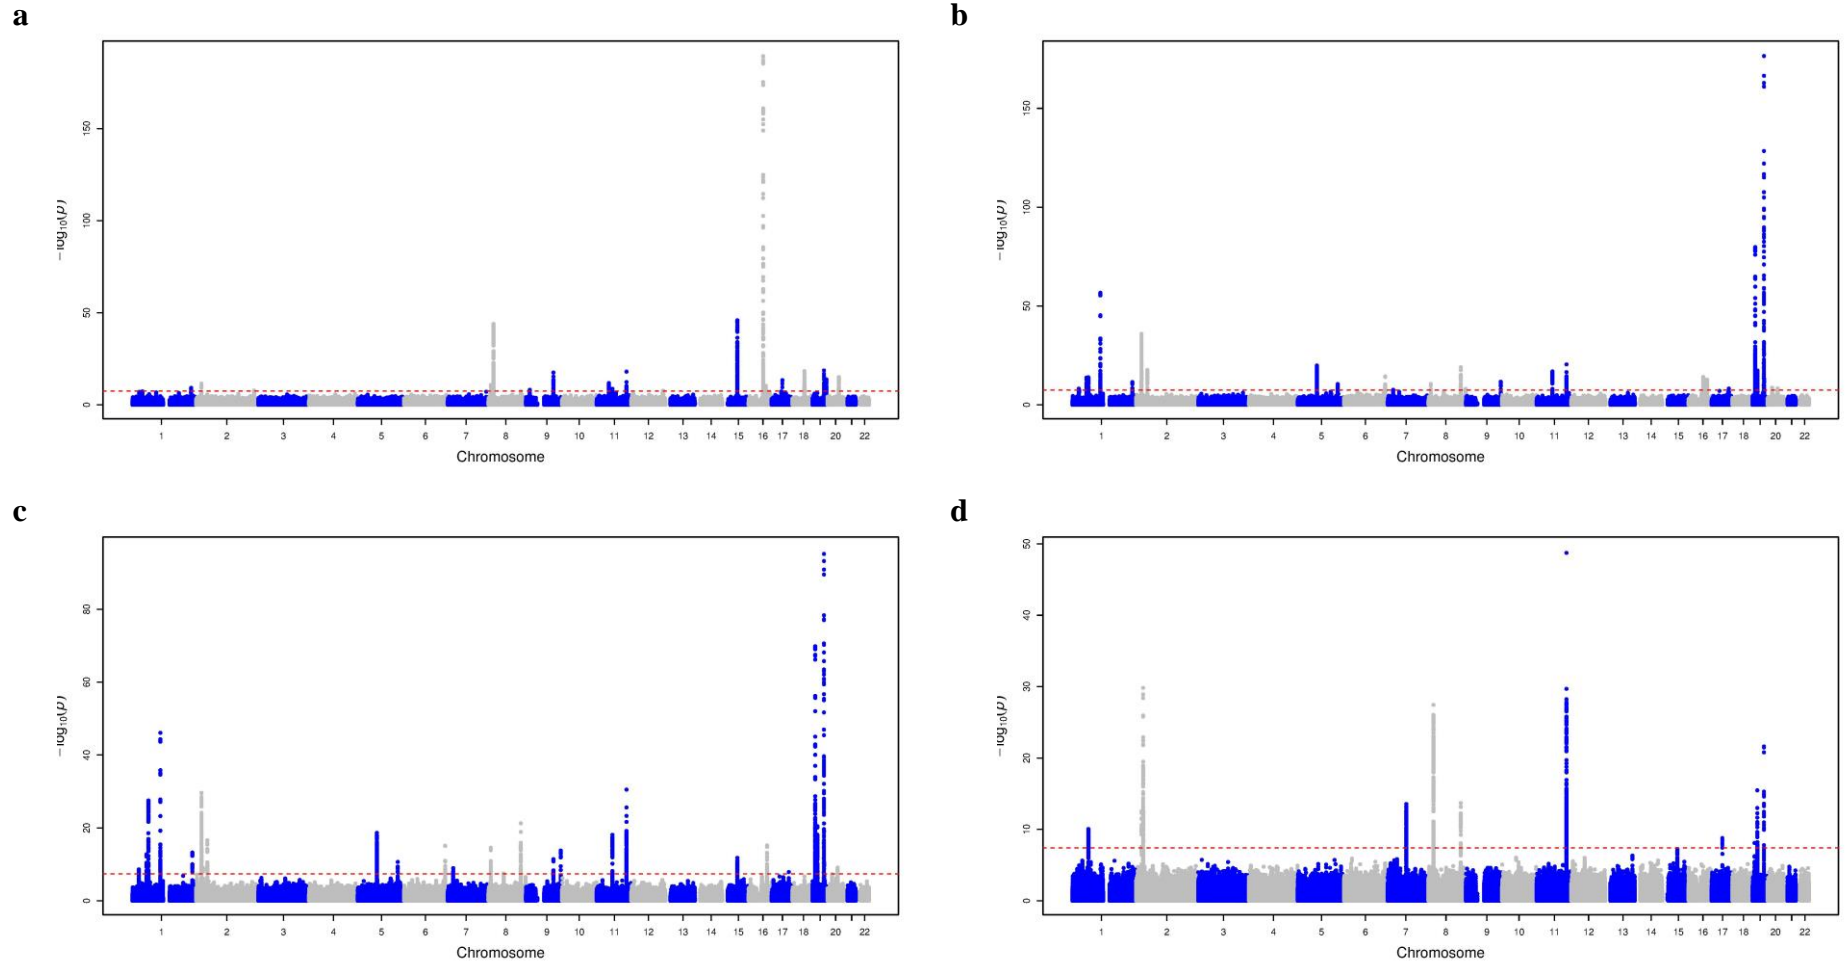

**Supplementary Figure 14. The Manhattan plot of all the SNPs after meta-analysis per trait (a: HDL, b: LDL, c: TC and d: TG) and after filtering of the SNPs which do not have association results or did not meet the QC thresholds in less than 6 cohort of all discovery cohorts. Also, the SNPs that are labeled inaccessible by the Genome of the Netherlands project are removed to create the Manhattan plot.**

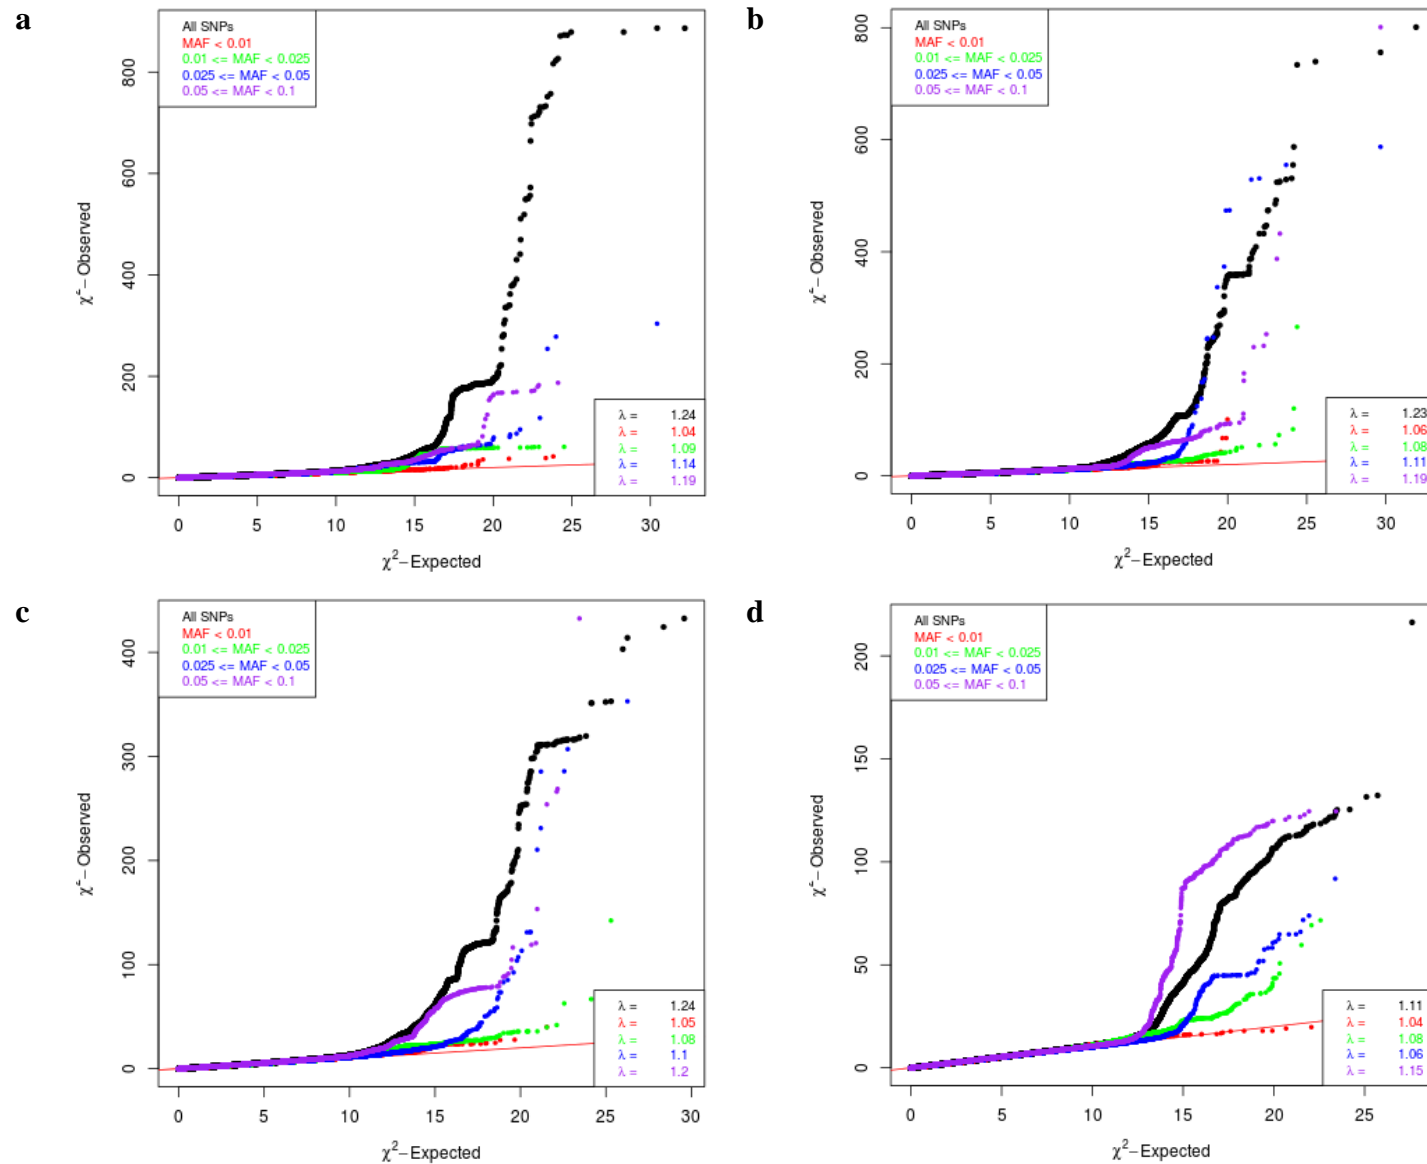

**Supplementary Figure 15.** The QQ plot of all the SNPs after meta-analysis per trait (a: HDL, b: LDL, c: TC and d: TG) and after filtering of the SNPs which do not have association results or did not meet the QC thresholds in less than 6 cohort of all discovery cohorts. Also, the SNPs that are labeled inaccessible by the Genome of the Netherlands project are removed to create the QQ plot.

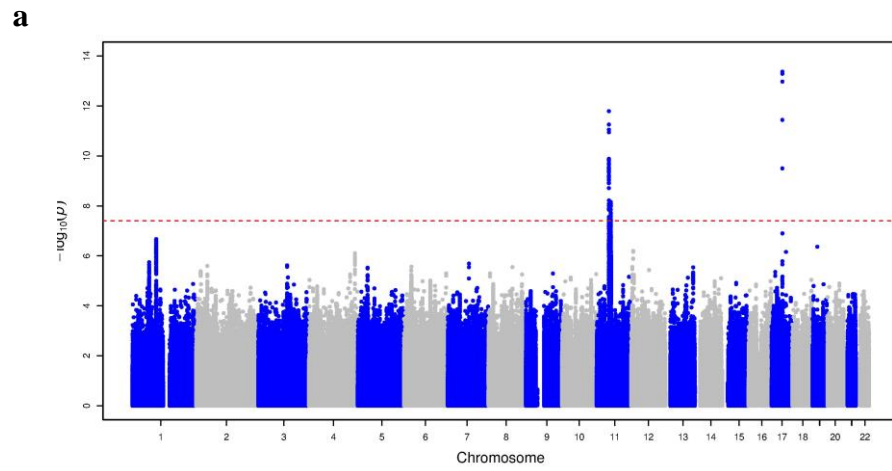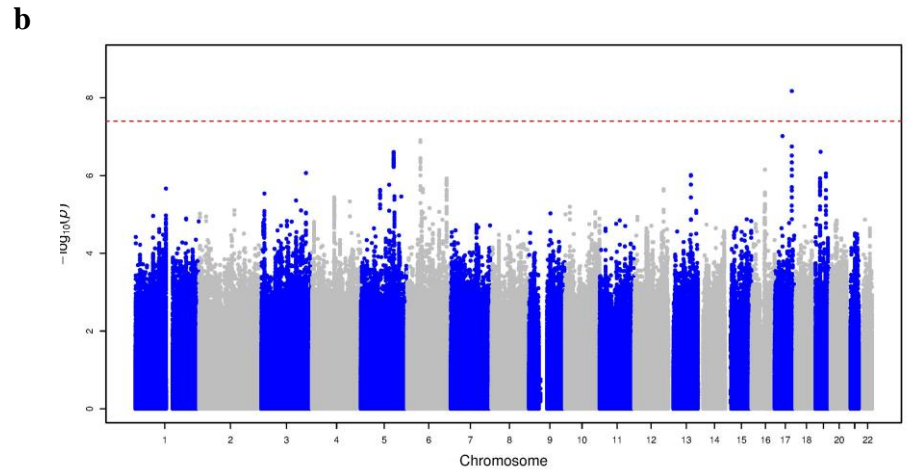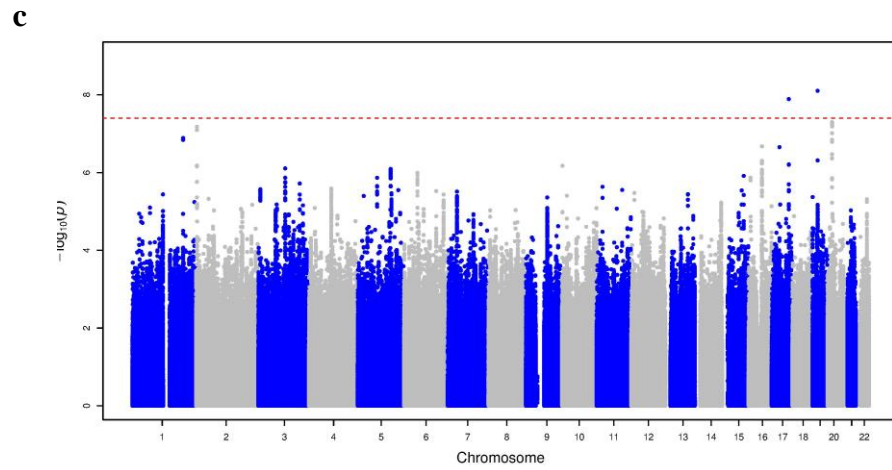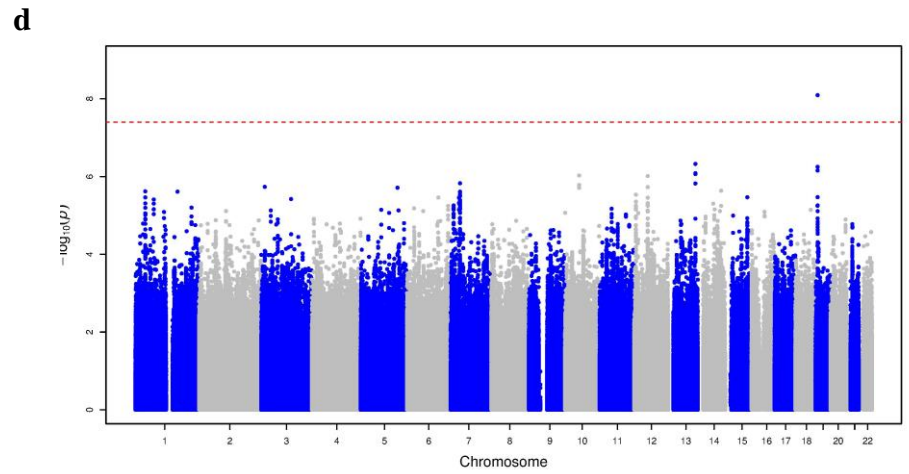

**Supplementary Figure 16. The Manhattan plot of all the SNPs after exclusion of all SNPs within 1Mb of a known locus per trait.**

a: HDL, b: LDL, c: TC and d: TG



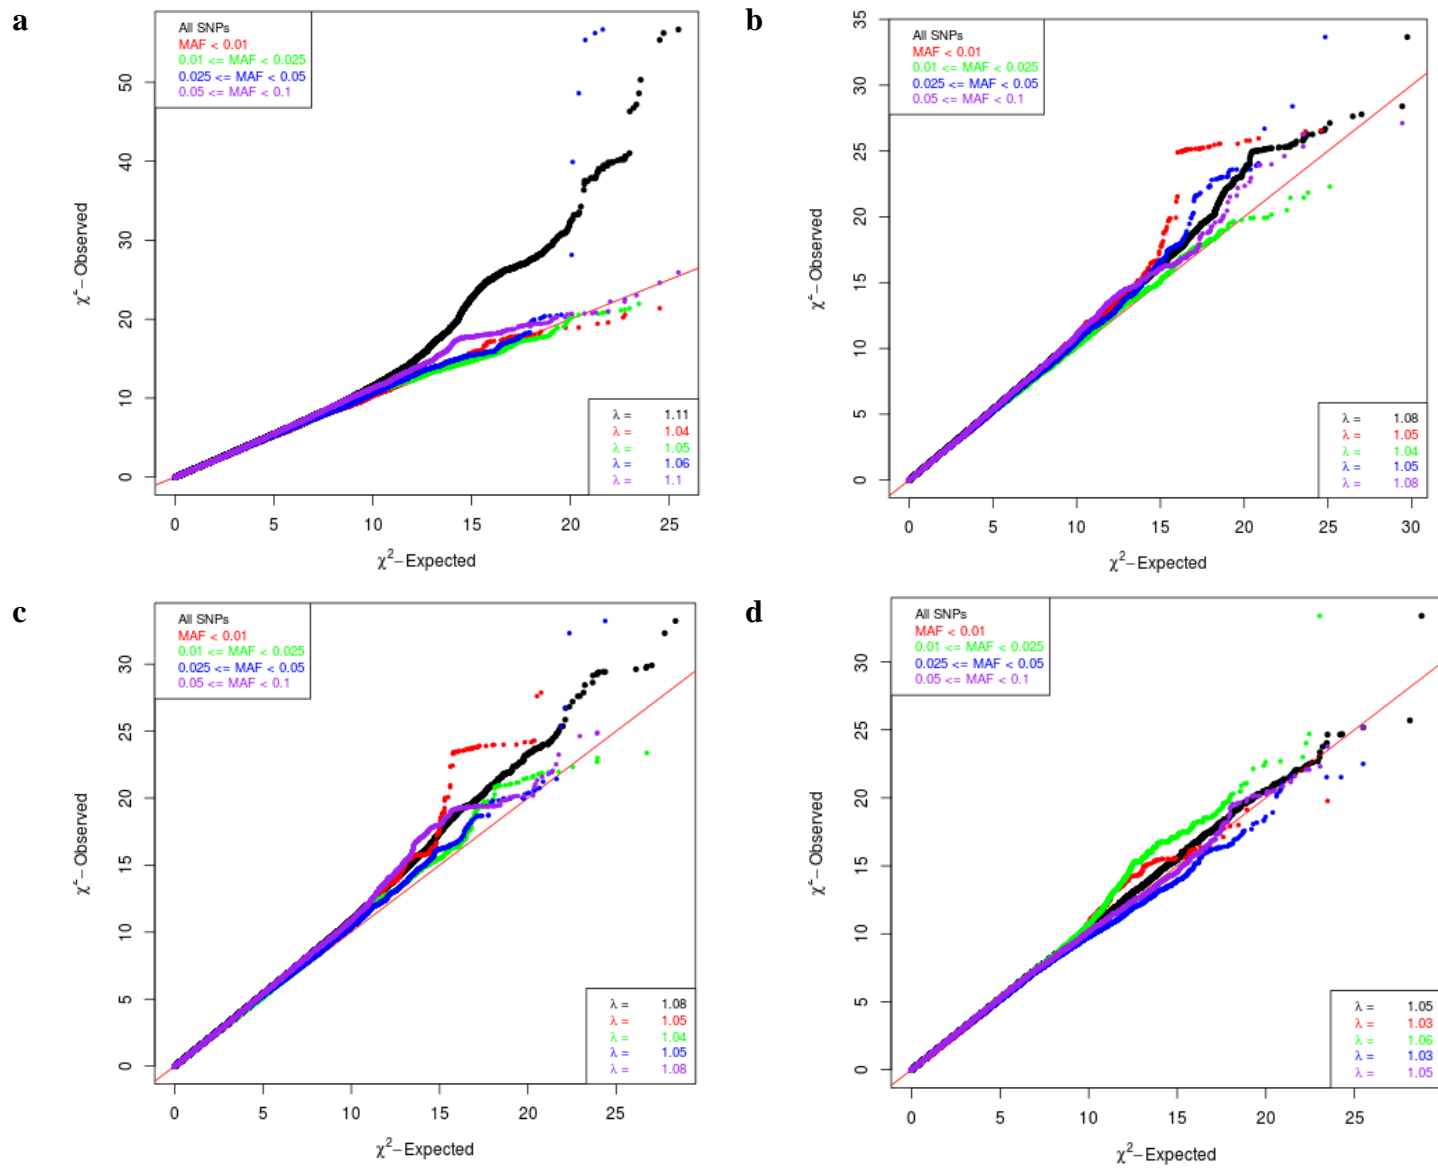

Supplementary Figure 17. The QQ plot of all the SNPs after exclusion of all SNPs within 1Mb of a known locus per trait.

a: HDL, b: LDL, c: TC and d: TG

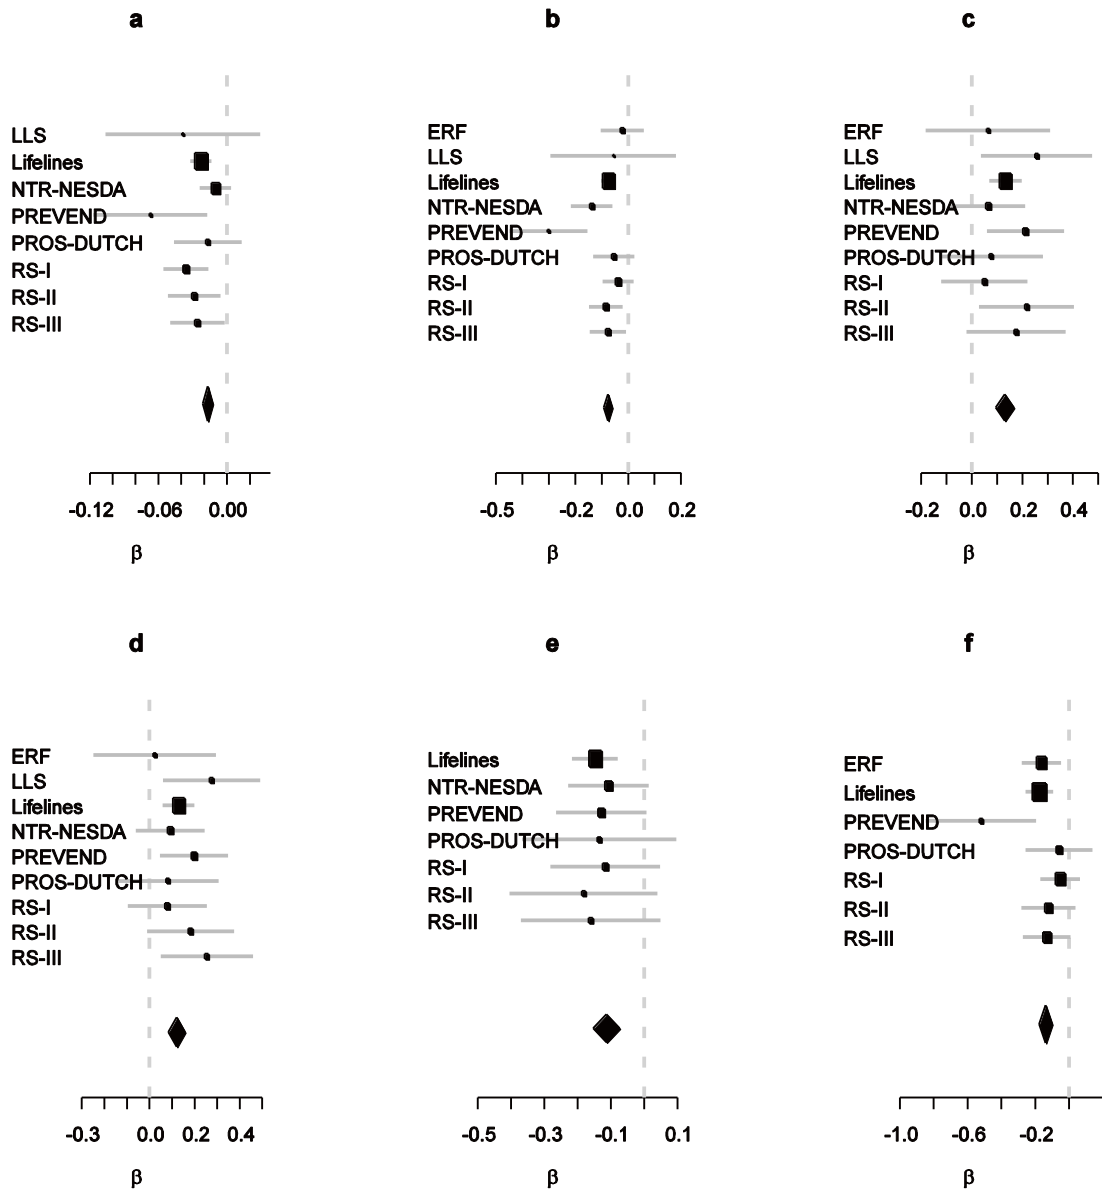

**Supplementary Figure 18. The forestplot of all potential novel loci after the discovery phase.**

Only cohorts of which the SNPs were not excluded after QC are included in the forestplot.

a: HDL, chromosome 11, position 47,907,641.

b: HDL, chromosome 17, position 41,874,745.

c: LDL, chromosome 17, position 67,081,278.

d: TC, chromosome 17, position 67,081,278.

e: TC, chromosome 19, position 20,479,901.

f: TG, chromosome 19, position 8,627,569.

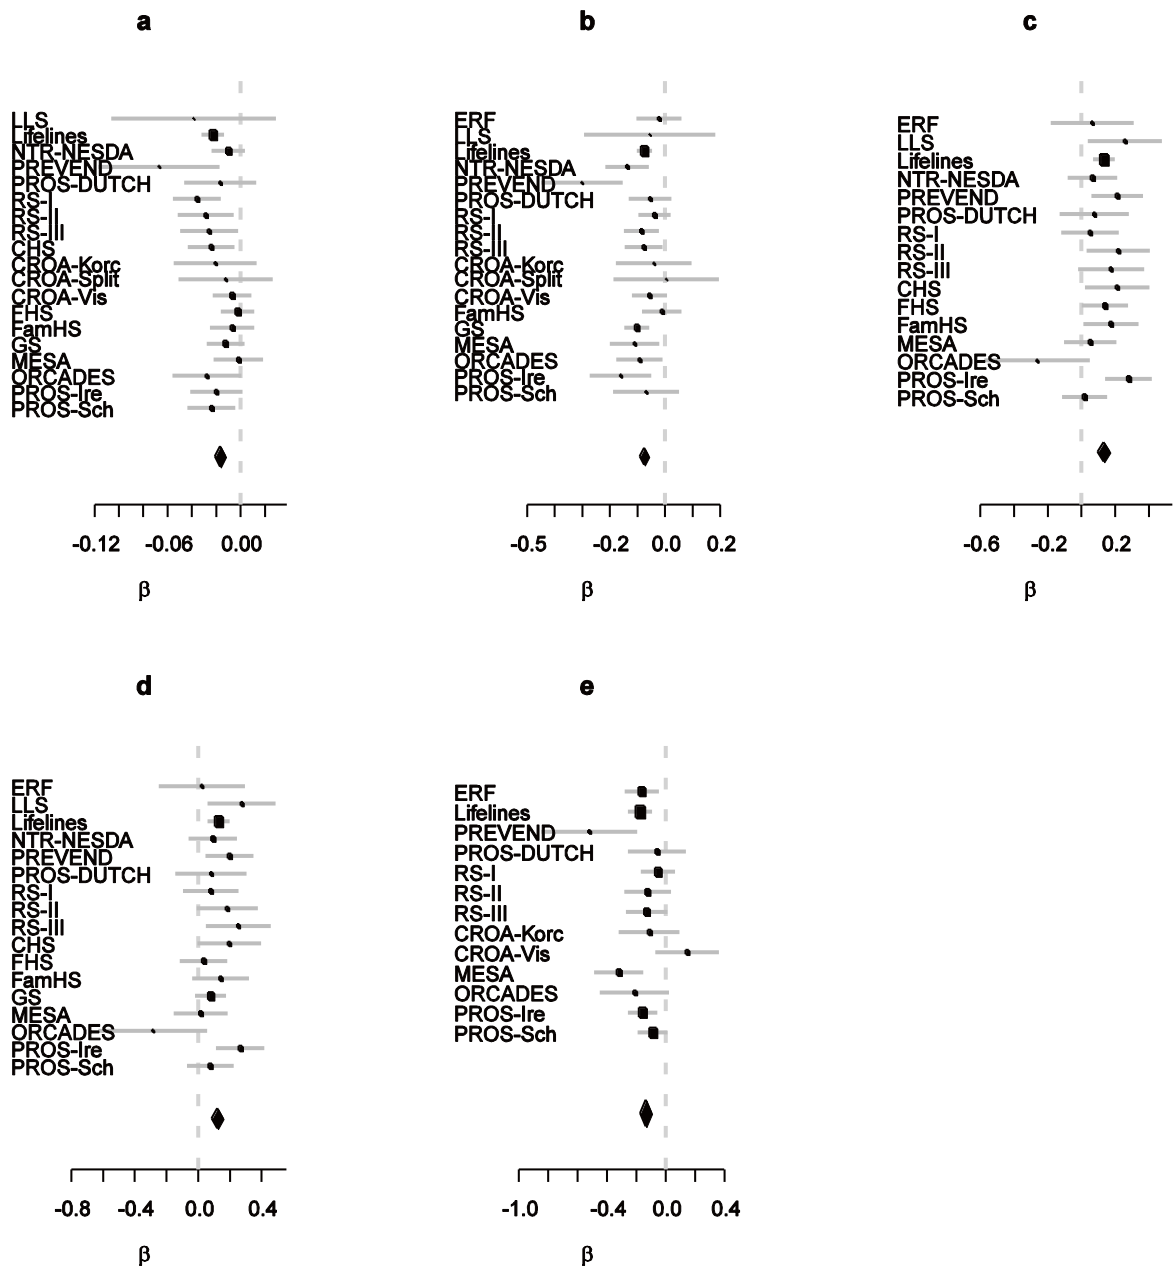

**Supplementary Figure 19. The forestplot of all novel, significant replicated loci after combining the discovery and replication phase.**

Only cohorts of which the SNPs were not excluded after QC are included in the forestplot.

a: HDL, chromosome 11, position 47,907,641.

b: HDL, chromosome 17, position 41,874,745.

c: LDL, chromosome 17, position 67,081,278.

d: TC, chromosome 17, position 67,081,278.

e: TG, chromosome 19, position 8,627,569.

## Supplementary tables

Supplementary Table 1. Baseline characteristics for the discovery cohorts.

| Cohort    | HDL           |                      |                                          | LDL           |                      |                                          |
|-----------|---------------|----------------------|------------------------------------------|---------------|----------------------|------------------------------------------|
|           | N (% male)    | Mean age (SD), years | Mean HDL-C (SD), in mmol L <sup>-1</sup> | N (% male)    | Mean age (SD), years | Mean LDL-C (SD), in mmol L <sup>-1</sup> |
| ERF       | 2387 (43.57)  | 47.38 (14.29)        | 1.29 (0.36)                              | 2376 (43.43)  | 47.34 (14.29)        | 3.81 (0.97)                              |
| Lifelines | 12328 (40.72) | 47.68 (11.03)        | 1.46 (0.39)                              | 12331 (40.73) | 47.68 (11.03)        | 3.34 (0.89)                              |
| LLS       | 2116 (44.99)  | 58.90 (6.85)         | 1.46 (0.45)                              | 2054 (44.74)  | 58.92 (6.85)         | 3.38 (0.91)                              |
| NTR-NESDA | 7564 (36.50)  | 42.41 (14.51)        | 1.47 (0.41)                              | 7501 (36.20)  | 42.36 (14.53)        | 3.39 (1.01)                              |
| PREVEND   | 3434 (51.20)  | 49.26 (12.41)        | 1.31 (0.39)                              | 3363 (50.80)  | 49.27 (12.45)        | 4.04 (1.09)                              |
| PROSPER   | 961 (52.30)   | 75.2 (3.3)           | 1.25 (0.32)                              | 961 (52.30)   | 75.2 (3.3)           | 3.94 (0.78)                              |
| RS-I      | 2989 (57.10)  | 66.17 (7.22)         | 1.39 (0.39)                              | 2884 (57.84)  | 66.16 (7.20)         | 4.17 (0.91)                              |
| RS-II     | 1859 (45.08)  | 64.67 (8.09)         | 1.38 (0.37)                              | 1819 (44.91)  | 64.65 (8.10)         | 4.17 (0.91)                              |
| RS-III    | 2362 (41.79)  | 56.52 (6.69)         | 1.45 (0.43)                              | 2335 (41.37)  | 56.52 (6.68)         | 3.95 (0.95)                              |

  

| Cohort    | TC            |                      |                                         | TG            |                      |                                         |
|-----------|---------------|----------------------|-----------------------------------------|---------------|----------------------|-----------------------------------------|
|           | N (% male)    | Mean age (SD), years | Mean TC-C (SD), in mmol L <sup>-1</sup> | N (% male)    | Mean age (SD), years | Mean TG-C (SD), in mmol L <sup>-1</sup> |
| ERF       | 2388 (43.61)  | 47.38 (14.29)        | 5.65 (1.08)                             | 2357 (43.23)  | 47.30 (14.31)        | 1.28 (0.65)                             |
| Lifelines | 12331 (40.73) | 47.69 (11.03)        | 5.16 (0.99)                             | 12220 (40.37) | 47.69 (11.04)        | 1.20 (0.65)                             |
| LLS       | 2099 (45.07)  | 58.90 (6.84)         | 5.66 (1.10)                             | -             | -                    | -                                       |
| NTR-NESDA | 7580 (36.50)  | 42.4 (14.51)         | 5.12 (1.07)                             | 7530 (36.20)  | 42.37 (14.52)        | 1.28 (0.67)                             |
| PREVEND   | 3488 (51.20)  | 49.25 (12.42)        | 5.65 (1.09)                             | 3436 (51.20)  | 49.26 (12.41)        | 1.43 (1.00)                             |
| PROSPER   | 961 (52.30)   | 75.2 (3.3)           | 5.78 (0.87)                             | 961 (52.30)   | 75.2 (3.3)           | 1.48 (0.67)                             |
| RS-I      | 3039 (57.82)  | 66.22 (7.22)         | 5.87 (0.97)                             | 2981 (58.37)  | 66.45 (7.43)         | 1.47 (0.64)                             |
| RS-II     | 1858 (45.05)  | 64.66 (8.08)         | 5.86 (0.95)                             | 1828 (44.97)  | 64.65 (8.10)         | 1.51 (0.70)                             |
| RS-III    | 2365 (41.78)  | 56.51 (6.65)         | 5.70 (1.01)                             | 2339 (41.30)  | 56.54 (6.71)         | 1.41 (0.67)                             |

**Supplementary Table 2. Independent variants associated with HDL after discovery phase.**

EA: effect allele. NEA: non-effect allele. MAF and MAF<sub>GoNL</sub>: the minor allele frequency of the effect allele in the discovery cohorts and in the GoNL reference panel. *N*: estimated effective sample size, determined by GCTA.

| Trait | Chr | Position    | EA | NEA | MAF   | After METAL analysis |               |                 | <i>N</i> | MAF <sub>GoNL</sub> | After GCTA analysis |               |                 |
|-------|-----|-------------|----|-----|-------|----------------------|---------------|-----------------|----------|---------------------|---------------------|---------------|-----------------|
|       |     |             |    |     |       | $\beta$              | SE $_{\beta}$ | <i>p</i> -value |          |                     | $\beta$             | SE $_{\beta}$ | <i>p</i> -value |
| HDL   | 1   | 40,035,928  | T  | G   | 0.214 | -0.020               | 0.004         | 5.08E-08        | 36625.8  | 0.215               | -0.020              | 0.004         | 4.84E-08        |
| HDL   | 1   | 230,296,153 | C  | T   | 0.402 | -0.020               | 0.003         | 6.61E-10        | 34235.8  | 0.424               | -0.020              | 0.003         | 5.12E-10        |
| HDL   | 2   | 21,226,560  | A  | G   | 0.218 | 0.025                | 0.004         | 3.19E-12        | 39941.1  | 0.223               | 0.025               | 0.004         | 1.75E-12        |
| HDL   | 2   | 227,125,254 | G  | A   | 0.379 | 0.017                | 0.003         | 2.00E-08        | 39442    | 0.363               | 0.017               | 0.003         | 1.21E-08        |
| HDL   | 8   | 9,181,395   | A  | G   | 0.093 | -0.035               | 0.005         | 2.91E-11        | 36742.7  | 0.092               | -0.035              | 0.005         | 2.57E-11        |
| HDL   | 8   | 19,772,641  | C  | T   | 0.019 | -0.090               | 0.012         | 3.83E-14        | 32890.6  | 0.018               | -0.078              | 0.012         | 4.25E-11        |
| HDL   | 8   | 19,793,581  | T  | C   | 0.027 | -0.096               | 0.010         | 3.21E-20        | 28968.8  | 0.028               | -0.103              | 0.010         | 7.61E-23        |
| HDL   | 8   | 19,819,328  | C  | T   | 0.106 | 0.067                | 0.005         | 1.27E-44        | 38222.9  | 0.117               | 0.042               | 0.006         | 1.40E-13        |
| HDL   | 8   | 19,819,439  | G  | A   | 0.295 | 0.044                | 0.003         | 1.75E-41        | 36775.2  | 0.296               | 0.028               | 0.004         | 1.16E-12        |
| HDL   | 8   | 126,495,818 | T  | C   | 0.463 | 0.017                | 0.003         | 4.40E-08        | 37391.8  | 0.453               | 0.017               | 0.003         | 3.18E-08        |
| HDL   | 9   | 15,298,666  | T  | C   | 0.164 | -0.023               | 0.004         | 8.10E-09        | 38493.9  | 0.145               | -0.023              | 0.004         | 7.81E-09        |
| HDL   | 9   | 107,661,742 | C  | A   | 0.263 | -0.030               | 0.003         | 3.29E-18        | 37633.1  | 0.246               | -0.032              | 0.003         | 1.35E-20        |
| HDL   | 9   | 107,690,124 | G  | A   | 0.333 | 0.015                | 0.003         | 1.21E-06        | 39508.4  | 0.324               | 0.018               | 0.003         | 3.74E-09        |
| HDL   | 11  | 47,676,170  | A  | G   | 0.497 | 0.001                | 0.003         | 8.01E-01        | 37237.3  | 0.495               | 0.025               | 0.004         | 2.05E-10        |
| HDL   | 11  | 47,907,641  | G  | A   | 0.355 | -0.023               | 0.003         | 1.62E-12        | 35668.4  | 0.347               | -0.040              | 0.004         | 1.74E-21        |
| HDL   | 11  | 61,603,510  | A  | C   | 0.325 | -0.020               | 0.003         | 2.17E-09        | 35034.9  | 0.355               | -0.020              | 0.003         | 3.50E-09        |
| HDL   | 11  | 116,648,917 | G  | C   | 0.133 | -0.041               | 0.005         | 1.00E-18        | 34302.5  | 0.133               | -0.058              | 0.005         | 6.02E-30        |
| HDL   | 11  | 116,705,516 | G  | A   | 0.282 | 0.011                | 0.003         | 1.62E-03        | 35784.6  | 0.289               | 0.030               | 0.004         | 5.61E-15        |
| HDL   | 12  | 123,790,007 | C  | T   | 0.085 | 0.029                | 0.005         | 2.98E-08        | 38558.3  | 0.076               | 0.030               | 0.005         | 9.88E-09        |
| HDL   | 12  | 125,259,888 | A  | G   | 0.340 | 0.018                | 0.003         | 2.24E-08        | 36584.4  | 0.352               | 0.019               | 0.003         | 7.57E-09        |
| HDL   | 15  | 58,571,910  | T  | C   | 0.279 | -0.020               | 0.003         | 1.32E-09        | 38733.1  | 0.281               | -0.022              | 0.003         | 2.20E-11        |
| HDL   | 15  | 58,671,765  | G  | T   | 0.352 | 0.043                | 0.003         | 6.14E-41        | 36133.9  | 0.333               | 0.024               | 0.004         | 2.20E-08        |
| HDL   | 15  | 58,680,178  | C  | T   | 0.360 | 0.045                | 0.003         | 1.30E-46        | 38117    | 0.328               | 0.028               | 0.004         | 7.07E-11        |
| HDL   | 15  | 58,730,498  | C  | T   | 0.211 | 0.040                | 0.004         | 2.36E-27        | 37165.2  | 0.202               | 0.043               | 0.004         | 1.39E-30        |
| HDL   | 16  | 49,498,861  | C  | G   | 0.245 | -0.006               | 0.004         | 1.22E-01        | 30589.1  | 0.231               | -0.023              | 0.004         | 6.41E-09        |
| HDL   | 16  | 51,493,551  | G  | C   | 0.078 | -0.011               | 0.006         | 5.33E-02        | 39534.8  | 0.077               | -0.047              | 0.006         | 5.96E-17        |
| HDL   | 16  | 51,980,822  | G  | A   | 0.030 | 0.007                | 0.009         | 4.31E-01        | 36183.4  | 0.033               | 0.062               | 0.009         | 1.58E-11        |
| HDL   | 16  | 54,316,920  | C  | G   | 0.211 | -0.007               | 0.004         | 1.18E-01        | 29352.1  | 0.193               | -0.047              | 0.004         | 6.10E-27        |
| HDL   | 16  | 54,655,478  | G  | C   | 0.022 | 0.030                | 0.012         | 1.09E-02        | 29737.8  | 0.026               | 0.125               | 0.012         | 2.69E-25        |
| HDL   | 16  | 55,733,248  | A  | G   | 0.122 | -0.021               | 0.007         | 3.13E-03        | 16421.4  | 0.113               | -0.054              | 0.007         | 3.37E-14        |
| HDL   | 16  | 56,576,250  | T  | G   | 0.012 | -0.020               | 0.016         | 2.29E-01        | 27794.4  | 0.017               | 0.104               | 0.017         | 7.20E-10        |
| HDL   | 16  | 56,624,079  | G  | A   | 0.421 | 0.004                | 0.003         | 2.57E-01        | 34492.2  | 0.405               | -0.025              | 0.003         | 2.04E-13        |
| HDL   | 16  | 56,759,695  | A  | G   | 0.036 | 0.032                | 0.008         | 1.16E-04        | 36296.7  | 0.042               | 0.115               | 0.009         | 7.61E-39        |
| HDL   | 16  | 56,933,409  | A  | G   | 0.044 | 0.015                | 0.008         | 5.43E-02        | 35363.7  | 0.039               | 0.141               | 0.008         | 4.84E-66        |
| HDL   | 16  | 56,982,299  | T  | C   | 0.373 | 0.009                | 0.003         | 5.62E-03        | 38320.8  | 0.353               | 0.028               | 0.003         | 1.47E-16        |
| HDL   | 16  | 56,985,514  | A  | G   | 0.334 | 0.094                | 0.003         | 1.99E-174       | 34727.6  | 0.328               | 0.123               | 0.006         | 2.65E-87        |
| HDL   | 16  | 56,990,803  | G  | A   | 0.247 | -0.039               | 0.004         | 5.26E-28        | 35627.5  | 0.246               | -0.240              | 0.008         | 4.88E-205       |
| HDL   | 16  | 56,991,363  | T  | C   | 0.334 | 0.092                | 0.003         | 4.13E-190       | 39381.6  | 0.329               | 0.197               | 0.007         | 1.65E-152       |
| HDL   | 16  | 56,993,897  | C  | A   | 0.212 | -0.027               | 0.004         | 3.01E-11        | 32173.2  | 0.180               | -0.217              | 0.007         | 2.17E-194       |
| HDL   | 16  | 56,994,212  | C  | T   | 0.269 | -0.057               | 0.003         | 6.27E-62        | 37604.8  | 0.280               | 0.090               | 0.006         | 4.48E-47        |
| HDL   | 16  | 56,994,894  | A  | G   | 0.499 | 0.001                | 0.003         | 8.33E-01        | 35844.1  | 0.533               | -0.411              | 0.008         | 0.00E+00        |
| HDL   | 16  | 57,033,607  | A  | G   | 0.210 | 0.008                | 0.004         | 4.91E-02        | 32393.4  | 0.213               | -0.044              | 0.004         | 2.53E-25        |
| HDL   | 16  | 57,170,189  | C  | T   | 0.042 | 0.019                | 0.008         | 1.27E-02        | 38481.3  | 0.050               | 0.129               | 0.008         | 1.73E-60        |
| HDL   | 16  | 57,470,884  | C  | A   | 0.150 | 0.006                | 0.004         | 1.68E-01        | 38287    | 0.155               | 0.037               | 0.004         | 7.78E-18        |
| HDL   | 16  | 57,911,524  | T  | C   | 0.011 | -0.041               | 0.021         | 5.02E-02        | 18791    | 0.015               | -0.160              | 0.022         | 1.22E-13        |
| HDL   | 16  | 63,121,015  | A  | G   | 0.086 | -0.008               | 0.005         | 1.21E-01        | 39123.1  | 0.090               | -0.044              | 0.005         | 3.82E-16        |

---

|     |    |            |   |   |       |        |       |          |         |       |        |       |          |
|-----|----|------------|---|---|-------|--------|-------|----------|---------|-------|--------|-------|----------|
| HDL | 16 | 64,729,743 | A | G | 0.161 | 0.005  | 0.004 | 2.31E-01 | 34408.7 | 0.161 | 0.031  | 0.004 | 2.63E-12 |
| HDL | 16 | 66,514,962 | T | C | 0.059 | -0.001 | 0.007 | 8.85E-01 | 36480.7 | 0.064 | -0.046 | 0.007 | 4.10E-12 |
| HDL | 16 | 66,687,201 | T | C | 0.030 | 0.045  | 0.011 | 2.72E-05 | 25830   | 0.025 | 0.085  | 0.011 | 1.10E-14 |
| HDL | 16 | 67,655,133 | C | T | 0.128 | 0.028  | 0.005 | 6.55E-09 | 33452.4 | 0.125 | 0.028  | 0.005 | 1.59E-08 |
| HDL | 17 | 37,829,571 | C | A | 0.389 | -0.018 | 0.003 | 5.63E-08 | 33396.7 | 0.416 | -0.019 | 0.003 | 4.31E-09 |
| HDL | 17 | 41,874,745 | A | C | 0.036 | -0.075 | 0.010 | 4.23E-14 | 25141.2 | 0.029 | -0.078 | 0.010 | 5.72E-15 |
| HDL | 18 | 47,096,294 | A | G | 0.174 | -0.022 | 0.004 | 5.52E-08 | 34858   | 0.174 | -0.026 | 0.004 | 2.00E-10 |
| HDL | 18 | 47,158,186 | T | C | 0.166 | -0.035 | 0.004 | 5.17E-19 | 38116   | 0.168 | -0.038 | 0.004 | 4.74E-21 |
| HDL | 18 | 47,169,340 | G | T | 0.013 | 0.111  | 0.015 | 4.49E-14 | 30630.7 | 0.011 | 0.107  | 0.015 | 4.01E-13 |
| HDL | 19 | 45,422,160 | G | C | 0.187 | -0.039 | 0.004 | 2.36E-19 | 31772.3 | 0.200 | -0.044 | 0.004 | 1.92E-24 |
| HDL | 19 | 45,448,465 | G | T | 0.345 | 0.018  | 0.003 | 1.03E-07 | 34267.7 | 0.347 | 0.022  | 0.003 | 2.67E-10 |
| HDL | 19 | 54,809,343 | G | T | 0.195 | 0.033  | 0.004 | 2.03E-14 | 30755.7 | 0.195 | 0.036  | 0.004 | 9.67E-17 |
| HDL | 20 | 43,042,364 | T | C | 0.037 | -0.052 | 0.009 | 8.65E-09 | 29736.3 | 0.037 | -0.058 | 0.009 | 1.41E-10 |
| HDL | 20 | 44,545,460 | G | A | 0.268 | -0.027 | 0.003 | 9.87E-16 | 39733.7 | 0.271 | -0.028 | 0.003 | 1.34E-17 |

---

**Supplementary Table 3. Independent variants associated with LDL after discovery phase.**

EA: effect allele. NEA: non-effect allele. MAF and MAF<sub>GoNL</sub>: the minor allele frequency of the effect allele in the discovery cohorts and in the GoNL reference panel. *N*: estimated effective sample size, determined by GCTA.

| Trait | Chr | Position    | EA | NEA | MAF   | After METAL analysis |               |                 | <i>N</i> | MAF <sub>GoNL</sub> | After GCTA analysis |               |                 |
|-------|-----|-------------|----|-----|-------|----------------------|---------------|-----------------|----------|---------------------|---------------------|---------------|-----------------|
|       |     |             |    |     |       | $\beta$              | SE $_{\beta}$ | <i>p</i> -value |          |                     | $\beta$             | SE $_{\beta}$ | <i>p</i> -value |
| LDL   | 1   | 25,580,095  | A  | G   | 0.443 | -0.047               | 0.008         | 7.28E-09        | 28797.3  | 0.430               | -0.132              | 0.013         | 2.62E-23        |
| LDL   | 1   | 25,724,005  | C  | T   | 0.494 | 0.012                | 0.007         | 1.15E-01        | 34179    | 0.505               | 0.180               | 0.014         | 5.52E-37        |
| LDL   | 1   | 25,754,025  | G  | C   | 0.454 | 0.034                | 0.007         | 1.47E-06        | 36409.5  | 0.438               | 0.091               | 0.012         | 4.83E-15        |
| LDL   | 1   | 55,493,584  | A  | C   | 0.242 | -0.065               | 0.008         | 1.83E-14        | 35129.4  | 0.237               | -0.066              | 0.008         | 6.05E-15        |
| LDL   | 1   | 55,521,195  | T  | C   | 0.088 | -0.075               | 0.014         | 2.56E-08        | 30971.3  | 0.076               | -0.079              | 0.014         | 5.51E-09        |
| LDL   | 1   | 62,981,440  | G  | A   | 0.371 | -0.055               | 0.007         | 1.61E-14        | 38663.4  | 0.373               | -0.060              | 0.007         | 5.40E-17        |
| LDL   | 1   | 109,783,570 | T  | A   | 0.438 | -0.010               | 0.007         | 1.31E-01        | 38859.4  | 0.418               | -0.174              | 0.016         | 2.35E-27        |
| LDL   | 1   | 109,784,938 | C  | T   | 0.458 | 0.042                | 0.007         | 7.86E-10        | 39626    | 0.454               | 0.167               | 0.016         | 7.25E-26        |
| LDL   | 1   | 109,788,453 | T  | A   | 0.489 | -0.001               | 0.007         | 8.90E-01        | 39406.9  | 0.500               | -0.354              | 0.020         | 1.38E-71        |
| LDL   | 1   | 109,818,530 | C  | T   | 0.238 | -0.139               | 0.009         | 2.20E-57        | 32964.9  | 0.212               | -0.169              | 0.010         | 1.82E-59        |
| LDL   | 1   | 109,950,441 | A  | T   | 0.075 | -0.097               | 0.014         | 9.69E-13        | 36138.6  | 0.080               | -0.131              | 0.018         | 9.45E-14        |
| LDL   | 1   | 234,849,339 | G  | A   | 0.477 | -0.048               | 0.007         | 4.05E-12        | 38286.8  | 0.479               | -0.048              | 0.007         | 2.93E-12        |
| LDL   | 2   | 21,152,755  | A  | G   | 0.053 | -0.135               | 0.017         | 4.43E-16        | 32511.3  | 0.043               | -0.177              | 0.017         | 1.11E-24        |
| LDL   | 2   | 21,183,334  | C  | A   | 0.061 | 0.023                | 0.016         | 1.38E-01        | 32155.9  | 0.058               | 0.144               | 0.022         | 2.04E-11        |
| LDL   | 2   | 21,202,959  | A  | C   | 0.276 | 0.041                | 0.008         | 7.18E-08        | 38143.2  | 0.278               | 0.234               | 0.019         | 1.69E-35        |
| LDL   | 2   | 21,213,193  | T  | C   | 0.273 | 0.057                | 0.008         | 2.66E-13        | 37392.1  | 0.291               | 0.327               | 0.020         | 1.84E-57        |
| LDL   | 2   | 21,216,815  | A  | C   | 0.365 | 0.074                | 0.007         | 5.67E-25        | 37512    | 0.360               | 0.137               | 0.012         | 1.14E-31        |
| LDL   | 2   | 21,217,490  | T  | C   | 0.479 | 0.020                | 0.007         | 2.91E-03        | 39156.3  | 0.520               | -0.476              | 0.019         | 1.39E-142       |
| LDL   | 2   | 21,244,000  | T  | G   | 0.451 | 0.082                | 0.007         | 7.43E-33        | 38190.2  | 0.474               | 0.269               | 0.018         | 9.47E-51        |
| LDL   | 2   | 21,250,914  | A  | G   | 0.492 | -0.057               | 0.007         | 5.86E-16        | 36837.3  | 0.450               | 0.113               | 0.014         | 4.27E-16        |
| LDL   | 2   | 21,291,529  | G  | A   | 0.181 | -0.114               | 0.009         | 1.41E-36        | 37527    | 0.138               | -0.078              | 0.010         | 1.10E-15        |
| LDL   | 2   | 44,063,098  | C  | G   | 0.070 | -0.111               | 0.014         | 1.70E-15        | 35726.1  | 0.056               | -0.093              | 0.014         | 4.88E-11        |
| LDL   | 2   | 44,072,576  | G  | T   | 0.311 | 0.070                | 0.008         | 2.55E-18        | 32059.6  | 0.313               | 0.061               | 0.008         | 9.90E-14        |
| LDL   | 5   | 74,656,539  | C  | T   | 0.415 | 0.066                | 0.007         | 1.44E-20        | 36784.9  | 0.396               | 0.066               | 0.007         | 2.74E-20        |
| LDL   | 5   | 156,443,066 | A  | G   | 0.369 | -0.047               | 0.007         | 3.51E-11        | 38391    | 0.346               | -0.047              | 0.007         | 3.36E-11        |
| LDL   | 6   | 160,985,526 | A  | G   | 0.075 | 0.123                | 0.016         | 4.71E-15        | 26519.1  | 0.079               | 0.123               | 0.016         | 4.35E-15        |
| LDL   | 7   | 21,613,842  | A  | G   | 0.243 | 0.045                | 0.008         | 2.48E-08        | 37677.7  | 0.248               | 0.045               | 0.008         | 2.80E-08        |
| LDL   | 8   | 9,184,231   | G  | A   | 0.092 | -0.080               | 0.012         | 2.93E-11        | 37524.7  | 0.088               | -0.080              | 0.012         | 2.69E-11        |
| LDL   | 8   | 126,500,031 | G  | C   | 0.456 | -0.062               | 0.007         | 1.00E-19        | 39312.3  | 0.441               | -0.062              | 0.007         | 1.10E-19        |
| LDL   | 8   | 145,069,534 | T  | C   | 0.360 | 0.041                | 0.007         | 1.07E-08        | 37800.2  | 0.338               | 0.041               | 0.007         | 1.16E-08        |
| LDL   | 9   | 136,141,870 | T  | C   | 0.201 | 0.061                | 0.009         | 2.12E-12        | 38309.2  | 0.193               | 0.061               | 0.009         | 1.90E-12        |
| LDL   | 11  | 61,557,803  | C  | T   | 0.339 | -0.065               | 0.008         | 1.32E-17        | 34812.4  | 0.359               | -0.065              | 0.008         | 1.46E-17        |
| LDL   | 11  | 116,648,917 | G  | C   | 0.139 | 0.099                | 0.011         | 3.68E-21        | 34160.5  | 0.133               | 0.099               | 0.011         | 3.25E-21        |
| LDL   | 16  | 52,310,527  | A  | G   | 0.195 | 0.044                | 0.009         | 7.04E-07        | 37284.7  | 0.193               | 0.049               | 0.009         | 4.40E-08        |
| LDL   | 16  | 56,993,324  | A  | C   | 0.341 | -0.057               | 0.007         | 8.64E-15        | 37697.1  | 0.329               | -0.199              | 0.016         | 3.39E-36        |
| LDL   | 16  | 56,994,212  | C  | T   | 0.277 | 0.034                | 0.008         | 1.71E-05        | 36223.3  | 0.280               | -0.101              | 0.014         | 1.18E-13        |
| LDL   | 16  | 56,994,894  | A  | G   | 0.492 | 0.007                | 0.007         | 3.42E-01        | 35858.9  | 0.533               | 0.153               | 0.014         | 7.98E-27        |
| LDL   | 16  | 72,148,419  | G  | A   | 0.200 | 0.065                | 0.009         | 1.86E-13        | 37388.9  | 0.189               | 0.065               | 0.009         | 2.21E-13        |
| LDL   | 17  | 67,081,278  | G  | A   | 0.034 | 0.135                | 0.023         | 6.67E-09        | 26820.2  | 0.030               | 0.135               | 0.023         | 6.71E-09        |
| LDL   | 19  | 11,198,502  | C  | T   | 0.134 | -0.198               | 0.010         | 1.76E-80        | 38321.5  | 0.117               | -0.199              | 0.011         | 1.76E-73        |
| LDL   | 19  | 11,227,480  | A  | C   | 0.428 | -0.069               | 0.007         | 1.04E-23        | 41483    | 0.411               | -0.080              | 0.007         | 3.69E-29        |
| LDL   | 19  | 11,248,104  | A  | G   | 0.034 | -0.084               | 0.019         | 1.43E-05        | 38962.9  | 0.029               | -0.158              | 0.020         | 2.82E-15        |
| LDL   | 19  | 11,283,516  | A  | G   | 0.065 | -0.234               | 0.024         | 8.01E-22        | 13262.4  | 0.058               | -0.150              | 0.026         | 4.09E-09        |
| LDL   | 19  | 11,411,868  | A  | C   | 0.311 | -0.033               | 0.008         | 1.34E-05        | 39155.4  | 0.309               | -0.049              | 0.008         | 2.37E-10        |
| LDL   | 19  | 18,285,944  | A  | G   | 0.276 | 0.037                | 0.008         | 2.50E-06        | 39847    | 0.270               | 0.060               | 0.008         | 3.22E-14        |
| LDL   | 19  | 19,299,305  | T  | C   | 0.058 | 0.070                | 0.019         | 2.53E-04        | 24046.7  | 0.061               | 0.125               | 0.019         | 1.20E-10        |

|     |    |            |   |   |       |        |       |           |         |       |        |       |           |
|-----|----|------------|---|---|-------|--------|-------|-----------|---------|-------|--------|-------|-----------|
| LDL | 19 | 19,447,352 | G | A | 0.052 | -0.149 | 0.018 | 4.63E-17  | 31240.3 | 0.038 | -0.141 | 0.018 | 3.30E-15  |
| LDL | 19 | 35,858,483 | T | C | 0.393 | -0.003 | 0.009 | 7.04E-01  | 25087.9 | 0.396 | -0.196 | 0.009 | 1.71E-95  |
| LDL | 19 | 36,324,324 | G | A | 0.194 | 0.000  | 0.011 | 9.83E-01  | 25143.4 | 0.210 | -0.355 | 0.012 | 1.63E-194 |
| LDL | 19 | 36,624,359 | A | G | 0.319 | 0.002  | 0.009 | 8.32E-01  | 28810.2 | 0.327 | -0.278 | 0.009 | 8.92E-193 |
| LDL | 19 | 37,947,185 | T | C | 0.016 | 0.048  | 0.033 | 1.45E-01  | 28961   | 0.015 | 1.350  | 0.036 | 1.71E-302 |
| LDL | 19 | 38,269,871 | G | C | 0.021 | 0.056  | 0.030 | 6.63E-02  | 26034.5 | 0.019 | 1.139  | 0.033 | 8.93E-267 |
| LDL | 19 | 38,683,266 | C | A | 0.029 | 0.016  | 0.025 | 5.26E-01  | 27834.9 | 0.027 | 0.920  | 0.027 | 9.19E-256 |
| LDL | 19 | 38,832,410 | T | C | 0.014 | -0.066 | 0.035 | 5.99E-02  | 29870.6 | 0.024 | -0.798 | 0.037 | 1.34E-103 |
| LDL | 19 | 39,120,462 | A | G | 0.012 | -0.133 | 0.038 | 4.15E-04  | 27829   | 0.013 | -1.969 | 0.047 | 0.00E+00  |
| LDL | 19 | 39,292,117 | T | A | 0.037 | -0.033 | 0.022 | 1.21E-01  | 29496.3 | 0.038 | 1.227  | 0.028 | 0.00E+00  |
| LDL | 19 | 39,549,365 | G | T | 0.067 | -0.021 | 0.017 | 2.30E-01  | 25462.4 | 0.046 | -0.664 | 0.019 | 2.07E-260 |
| LDL | 19 | 40,080,355 | C | G | 0.018 | 0.051  | 0.029 | 7.98E-02  | 31633   | 0.015 | 1.137  | 0.032 | 2.00E-268 |
| LDL | 19 | 40,102,981 | A | T | 0.042 | -0.033 | 0.021 | 1.14E-01  | 26979.1 | 0.038 | -0.526 | 0.023 | 5.53E-115 |
| LDL | 19 | 40,260,983 | G | C | 0.015 | 0.013  | 0.040 | 7.57E-01  | 20463.5 | 0.014 | 1.193  | 0.043 | 3.57E-166 |
| LDL | 19 | 41,375,256 | G | C | 0.023 | -0.161 | 0.036 | 6.01E-06  | 17215   | 0.012 | -1.277 | 0.039 | 7.25E-237 |
| LDL | 19 | 41,402,057 | G | A | 0.007 | -0.153 | 0.072 | 3.37E-02  | 14253   | 0.010 | -1.261 | 0.075 | 6.71E-63  |
| LDL | 19 | 41,738,212 | T | C | 0.045 | -0.010 | 0.024 | 6.78E-01  | 19781.3 | 0.048 | -0.452 | 0.025 | 2.29E-70  |
| LDL | 19 | 42,016,880 | C | T | 0.308 | 0.000  | 0.008 | 9.75E-01  | 32228.5 | 0.316 | 0.220  | 0.009 | 2.82E-124 |
| LDL | 19 | 42,059,389 | C | T | 0.484 | 0.000  | 0.008 | 9.74E-01  | 32724.9 | 0.490 | -0.067 | 0.009 | 9.82E-14  |
| LDL | 19 | 42,107,792 | C | A | 0.105 | 0.039  | 0.012 | 9.23E-04  | 38182.7 | 0.087 | 0.283  | 0.013 | 4.88E-106 |
| LDL | 19 | 42,424,510 | T | C | 0.063 | -0.007 | 0.018 | 7.09E-01  | 24428   | 0.070 | 0.554  | 0.020 | 7.76E-164 |
| LDL | 19 | 43,908,757 | C | G | 0.024 | -0.098 | 0.037 | 7.30E-03  | 15396.2 | 0.027 | -0.819 | 0.041 | 1.09E-90  |
| LDL | 19 | 43,912,233 | T | C | 0.101 | -0.032 | 0.012 | 9.52E-03  | 34733.7 | 0.107 | -0.298 | 0.014 | 1.70E-95  |
| LDL | 19 | 43,960,771 | T | C | 0.117 | -0.008 | 0.013 | 5.16E-01  | 28565.4 | 0.122 | 0.167  | 0.014 | 2.82E-33  |
| LDL | 19 | 43,976,583 | T | C | 0.118 | -0.016 | 0.012 | 1.54E-01  | 35334.9 | 0.131 | -0.264 | 0.012 | 2.14E-101 |
| LDL | 19 | 44,286,809 | T | C | 0.018 | -0.003 | 0.029 | 9.24E-01  | 32696.2 | 0.025 | -1.107 | 0.033 | 1.02E-253 |
| LDL | 19 | 44,352,665 | T | C | 0.290 | -0.013 | 0.009 | 1.35E-01  | 31085.8 | 0.332 | -0.301 | 0.010 | 5.69E-212 |
| LDL | 19 | 45,032,407 | G | C | 0.082 | -0.019 | 0.014 | 1.79E-01  | 32102.6 | 0.080 | -0.553 | 0.016 | 1.89E-268 |
| LDL | 19 | 45,302,504 | A | G | 0.025 | -0.624 | 0.034 | 2.41E-75  | 16597.1 | 0.020 | -0.681 | 0.042 | 1.62E-59  |
| LDL | 19 | 45,337,918 | A | G | 0.051 | 0.300  | 0.022 | 8.71E-42  | 20208.4 | 0.040 | 0.440  | 0.029 | 5.17E-53  |
| LDL | 19 | 45,359,706 | A | G | 0.295 | 0.130  | 0.008 | 3.98E-55  | 33597.2 | 0.270 | 0.235  | 0.010 | 1.71E-128 |
| LDL | 19 | 45,382,675 | A | G | 0.045 | -0.453 | 0.019 | 4.01E-129 | 31796   | 0.038 | -1.814 | 0.030 | 0.00E+00  |
| LDL | 19 | 45,389,596 | A | G | 0.042 | -0.450 | 0.019 | 8.88E-123 | 32309.1 | 0.044 | -1.209 | 0.036 | 5.02E-247 |
| LDL | 19 | 45,390,333 | G | A | 0.226 | 0.075  | 0.009 | 2.27E-17  | 34946.7 | 0.226 | 0.166  | 0.015 | 6.83E-29  |
| LDL | 19 | 45,404,972 | C | T | 0.474 | -0.002 | 0.007 | 8.23E-01  | 40820.5 | 0.504 | 0.097  | 0.008 | 6.29E-31  |
| LDL | 19 | 45,418,486 | A | G | 0.035 | 0.399  | 0.031 | 2.70E-38  | 14736.7 | 0.027 | 0.500  | 0.038 | 1.03E-38  |
| LDL | 19 | 45,420,082 | C | A | 0.099 | 0.307  | 0.016 | 6.56E-86  | 21876.2 | 0.093 | 0.626  | 0.021 | 1.88E-192 |
| LDL | 19 | 45,422,160 | G | C | 0.195 | 0.227  | 0.010 | 5.20E-116 | 30922.9 | 0.200 | 0.441  | 0.017 | 2.83E-154 |
| LDL | 19 | 45,426,792 | A | G | 0.066 | -0.504 | 0.018 | 3.33E-177 | 23940.4 | 0.062 | -1.398 | 0.032 | 0.00E+00  |
| LDL | 19 | 45,436,244 | C | T | 0.402 | 0.117  | 0.012 | 1.58E-23  | 14626.3 | 0.412 | 0.233  | 0.013 | 2.45E-71  |
| LDL | 19 | 45,522,181 | G | A | 0.480 | -0.007 | 0.008 | 3.82E-01  | 28182.4 | 0.527 | -0.107 | 0.009 | 2.73E-31  |
| LDL | 19 | 45,585,167 | T | C | 0.432 | -0.016 | 0.008 | 3.26E-02  | 34194.6 | 0.393 | -0.073 | 0.008 | 4.39E-18  |
| LDL | 19 | 45,762,886 | G | A | 0.246 | 0.010  | 0.010 | 3.12E-01  | 28386.3 | 0.254 | 0.584  | 0.012 | 0.00E+00  |
| LDL | 19 | 46,320,218 | A | G | 0.011 | -0.044 | 0.044 | 3.17E-01  | 23112.2 | 0.011 | 1.025  | 0.066 | 3.54E-55  |
| LDL | 19 | 46,514,441 | A | G | 0.264 | 0.020  | 0.009 | 2.81E-02  | 30090.3 | 0.269 | -0.353 | 0.011 | 4.73E-237 |
| LDL | 19 | 46,546,840 | A | C | 0.018 | -0.027 | 0.034 | 4.31E-01  | 23422.3 | 0.019 | -2.136 | 0.055 | 0.00E+00  |
| LDL | 19 | 46,817,166 | T | C | 0.026 | 0.018  | 0.025 | 4.71E-01  | 30111   | 0.026 | 1.015  | 0.029 | 9.65E-272 |
| LDL | 19 | 46,824,904 | T | A | 0.145 | 0.031  | 0.012 | 1.21E-02  | 25400.5 | 0.163 | 0.370  | 0.014 | 2.80E-160 |
| LDL | 19 | 46,972,134 | C | G | 0.022 | -0.008 | 0.027 | 7.55E-01  | 31314.9 | 0.026 | -0.730 | 0.030 | 5.41E-129 |
| LDL | 19 | 47,262,197 | T | C | 0.025 | -0.029 | 0.029 | 3.17E-01  | 23437.1 | 0.027 | -0.684 | 0.032 | 1.32E-102 |
| LDL | 19 | 47,305,297 | G | C | 0.413 | -0.013 | 0.009 | 1.29E-01  | 27658.1 | 0.394 | -0.381 | 0.010 | 1.11E-305 |
| LDL | 19 | 47,305,760 | G | T | 0.055 | 0.016  | 0.020 | 4.33E-01  | 23619.9 | 0.069 | 1.143  | 0.025 | 0.00E+00  |
| LDL | 19 | 48,225,314 | G | C | 0.303 | -0.011 | 0.010 | 3.11E-01  | 21225.5 | 0.289 | -0.294 | 0.011 | 7.32E-147 |



|     |    |            |   |   |       |        |       |          |         |       |        |       |           |
|-----|----|------------|---|---|-------|--------|-------|----------|---------|-------|--------|-------|-----------|
| LDL | 19 | 48,533,330 | C | T | 0.030 | -0.048 | 0.027 | 7.09E-02 | 23608.4 | 0.023 | -0.921 | 0.030 | 3.73E-210 |
| LDL | 19 | 49,186,141 | G | C | 0.165 | -0.018 | 0.010 | 6.42E-02 | 37415   | 0.163 | -0.310 | 0.011 | 1.15E-183 |
| LDL | 19 | 49,337,237 | G | A | 0.093 | 0.001  | 0.017 | 9.33E-01 | 21183.6 | 0.095 | 0.624  | 0.018 | 5.18E-252 |
| LDL | 19 | 49,554,632 | T | C | 0.268 | 0.001  | 0.011 | 9.68E-01 | 19696.9 | 0.271 | -0.067 | 0.012 | 9.60E-09  |
| LDL | 19 | 49,728,318 | A | G | 0.305 | -0.017 | 0.009 | 5.44E-02 | 29522.4 | 0.285 | -0.243 | 0.010 | 8.11E-133 |
| LDL | 19 | 49,877,060 | T | C | 0.008 | 0.183  | 0.066 | 5.34E-03 | 13838.5 | 0.008 | 0.432  | 0.068 | 2.42E-10  |
| LDL | 19 | 50,382,870 | G | T | 0.019 | 0.047  | 0.031 | 1.30E-01 | 26298.9 | 0.020 | 1.225  | 0.036 | 2.72E-252 |
| LDL | 19 | 50,747,533 | C | T | 0.037 | -0.028 | 0.024 | 2.34E-01 | 23946.5 | 0.038 | -0.747 | 0.027 | 1.22E-170 |
| LDL | 19 | 50,775,408 | T | C | 0.016 | -0.026 | 0.040 | 5.11E-01 | 19078.8 | 0.020 | -0.823 | 0.043 | 4.97E-80  |
| LDL | 19 | 50,779,151 | T | C | 0.261 | 0.012  | 0.009 | 2.06E-01 | 29674.7 | 0.268 | 0.266  | 0.010 | 2.21E-151 |
| LDL | 19 | 50,929,142 | G | A | 0.317 | 0.008  | 0.010 | 4.39E-01 | 22839.6 | 0.336 | 0.297  | 0.011 | 7.61E-162 |
| LDL | 19 | 51,579,634 | T | C | 0.019 | 0.025  | 0.034 | 4.53E-01 | 22391.6 | 0.024 | -0.781 | 0.036 | 6.60E-103 |
| LDL | 19 | 51,801,506 | T | G | 0.023 | 0.007  | 0.030 | 8.23E-01 | 24158.1 | 0.022 | 0.786  | 0.033 | 4.58E-123 |
| LDL | 19 | 51,820,554 | T | G | 0.013 | -0.036 | 0.042 | 3.82E-01 | 21282.4 | 0.020 | -2.018 | 0.048 | 0.00E+00  |
| LDL | 19 | 52,148,617 | G | A | 0.373 | 0.002  | 0.010 | 8.42E-01 | 20323.3 | 0.359 | -0.248 | 0.012 | 4.31E-94  |
| LDL | 19 | 52,162,237 | G | A | 0.343 | 0.007  | 0.008 | 4.06E-01 | 35339.4 | 0.326 | -0.104 | 0.009 | 4.79E-29  |
| LDL | 19 | 52,252,712 | A | G | 0.014 | -0.060 | 0.034 | 7.29E-02 | 30478.6 | 0.024 | 1.557  | 0.039 | 0.00E+00  |
| LDL | 19 | 52,285,858 | G | A | 0.300 | 0.003  | 0.009 | 7.58E-01 | 31969.3 | 0.289 | 0.204  | 0.009 | 2.93E-104 |
| LDL | 19 | 52,925,832 | G | A | 0.172 | -0.007 | 0.010 | 4.65E-01 | 35478.1 | 0.176 | -0.279 | 0.011 | 3.29E-151 |
| LDL | 19 | 53,069,703 | A | G | 0.047 | 0.003  | 0.018 | 8.67E-01 | 31763.2 | 0.051 | 0.748  | 0.022 | 2.23E-263 |
| LDL | 19 | 53,080,928 | A | G | 0.268 | -0.019 | 0.008 | 2.62E-02 | 35886.1 | 0.241 | -0.207 | 0.009 | 8.02E-117 |
| LDL | 19 | 53,103,677 | T | G | 0.019 | 0.062  | 0.029 | 3.59E-02 | 30708.7 | 0.026 | 0.208  | 0.032 | 4.47E-11  |
| LDL | 19 | 53,112,249 | C | G | 0.222 | 0.026  | 0.010 | 8.38E-03 | 28666.2 | 0.237 | 0.389  | 0.011 | 6.81E-252 |
| LDL | 19 | 53,135,014 | A | G | 0.266 | 0.003  | 0.009 | 7.06E-01 | 32073.4 | 0.249 | -0.207 | 0.014 | 3.54E-52  |
| LDL | 19 | 53,149,057 | A | C | 0.298 | 0.000  | 0.008 | 9.60E-01 | 34437.3 | 0.288 | 0.420  | 0.013 | 3.97E-226 |
| LDL | 19 | 53,637,115 | G | T | 0.113 | -0.018 | 0.014 | 2.02E-01 | 24761.2 | 0.119 | -0.398 | 0.015 | 1.68E-152 |
| LDL | 19 | 53,981,103 | G | T | 0.080 | -0.009 | 0.015 | 5.48E-01 | 28368.1 | 0.089 | -0.560 | 0.017 | 7.91E-230 |
| LDL | 19 | 54,226,681 | C | T | 0.019 | 0.122  | 0.036 | 6.86E-04 | 19743.5 | 0.025 | 0.794  | 0.038 | 7.29E-97  |
| LDL | 19 | 54,228,064 | A | C | 0.300 | -0.002 | 0.009 | 8.52E-01 | 31969.4 | 0.297 | -0.185 | 0.009 | 1.73E-89  |
| LDL | 19 | 54,618,206 | G | C | 0.115 | -0.003 | 0.012 | 7.90E-01 | 34273.5 | 0.113 | 0.314  | 0.013 | 1.48E-129 |
| LDL | 19 | 54,639,661 | G | C | 0.015 | -0.009 | 0.039 | 8.11E-01 | 21662.3 | 0.025 | -0.696 | 0.044 | 2.38E-57  |
| LDL | 19 | 55,013,318 | C | T | 0.220 | 0.008  | 0.009 | 3.63E-01 | 33320.2 | 0.208 | 0.286  | 0.010 | 2.14E-172 |
| LDL | 19 | 55,015,902 | T | C | 0.223 | 0.002  | 0.011 | 8.76E-01 | 25367.2 | 0.240 | 0.402  | 0.012 | 1.60E-252 |
| LDL | 19 | 55,454,861 | T | C | 0.043 | -0.013 | 0.022 | 5.61E-01 | 25183.7 | 0.042 | -0.801 | 0.024 | 1.13E-237 |
| LDL | 19 | 55,480,864 | T | A | 0.141 | 0.004  | 0.013 | 7.51E-01 | 24014.3 | 0.124 | 0.366  | 0.015 | 4.80E-139 |
| LDL | 19 | 55,513,879 | G | C | 0.016 | 0.022  | 0.033 | 5.14E-01 | 28456.8 | 0.023 | -0.941 | 0.037 | 3.72E-142 |
| LDL | 19 | 56,201,817 | G | A | 0.103 | 0.004  | 0.012 | 7.60E-01 | 36486.4 | 0.098 | -0.299 | 0.013 | 1.00E-117 |
| LDL | 19 | 56,438,192 | C | T | 0.006 | 0.069  | 0.062 | 2.70E-01 | 22898.4 | 0.005 | 2.023  | 0.069 | 4.80E-187 |
| LDL | 19 | 57,480,893 | A | G | 0.455 | -0.013 | 0.007 | 6.05E-02 | 38759.8 | 0.444 | -0.193 | 0.008 | 3.63E-142 |
| LDL | 19 | 58,190,130 | A | G | 0.035 | 0.000  | 0.024 | 9.87E-01 | 24980.5 | 0.036 | 0.742  | 0.026 | 7.16E-175 |
| LDL | 20 | 17,844,492 | G | T | 0.339 | 0.051  | 0.009 | 2.48E-09 | 28248.3 | 0.353 | 0.051  | 0.009 | 2.69E-09  |
| LDL | 20 | 39,218,023 | G | C | 0.384 | -0.039 | 0.007 | 2.45E-08 | 39476.9 | 0.360 | -0.040 | 0.007 | 9.90E-09  |
| LDL | 20 | 39,974,316 | G | A | 0.287 | 0.045  | 0.008 | 5.36E-09 | 37733.5 | 0.274 | 0.046  | 0.008 | 2.37E-09  |

---

**Supplementary Table 4. Independent variants associated with TC after discovery phase.**

EA: effect allele. NEA: non-effect allele. MAF and MAF<sub>GoNL</sub>: the minor allele frequency of the effect allele in the discovery cohorts and in the GoNL reference panel. *N*: estimated effective sample size, determined by GCTA.

| Trait | Chr | Position    | EA | NEA | MAF   | After METAL analysis |               |                 | <i>N</i> | MAF <sub>GoNL</sub> | After GCTA analysis |               |                 |
|-------|-----|-------------|----|-----|-------|----------------------|---------------|-----------------|----------|---------------------|---------------------|---------------|-----------------|
|       |     |             |    |     |       | $\beta$              | SE $_{\beta}$ | <i>p</i> -value |          |                     | $\beta$             | SE $_{\beta}$ | <i>p</i> -value |
| TC    | 1   | 25,724,005  | C  | T   | 0.493 | 0.009                | 0.008         | 2.31E-01        | 34227.7  | 0.505               | 0.133               | 0.013         | 4.14E-24        |
| TC    | 1   | 25,768,937  | A  | G   | 0.462 | -0.044               | 0.007         | 3.02E-09        | 39257.3  | 0.443               | -0.144              | 0.012         | 1.33E-31        |
| TC    | 1   | 55,493,584  | A  | C   | 0.244 | -0.066               | 0.009         | 1.87E-13        | 35579.7  | 0.237               | -0.070              | 0.009         | 5.27E-15        |
| TC    | 1   | 62,980,161  | A  | G   | 0.372 | -0.083               | 0.008         | 3.47E-28        | 39483.9  | 0.373               | -0.085              | 0.008         | 7.36E-30        |
| TC    | 1   | 109,818,530 | C  | T   | 0.240 | -0.131               | 0.009         | 8.01E-47        | 34223.3  | 0.212               | -0.131              | 0.009         | 5.50E-47        |
| TC    | 1   | 234,849,339 | G  | A   | 0.479 | -0.055               | 0.007         | 5.93E-14        | 39083.5  | 0.479               | -0.055              | 0.007         | 4.61E-14        |
| TC    | 2   | 21,014,883  | C  | T   | 0.018 | -0.062               | 0.031         | 4.19E-02        | 30523.4  | 0.024               | -0.211              | 0.034         | 7.58E-10        |
| TC    | 2   | 21,152,755  | A  | G   | 0.053 | -0.135               | 0.018         | 2.31E-14        | 32951.5  | 0.043               | -0.174              | 0.018         | 1.64E-21        |
| TC    | 2   | 21,183,334  | C  | A   | 0.061 | 0.021                | 0.017         | 1.96E-01        | 32707.9  | 0.058               | 0.140               | 0.023         | 5.32E-10        |
| TC    | 2   | 21,202,959  | A  | C   | 0.278 | 0.040                | 0.008         | 6.97E-07        | 39223    | 0.278               | 0.221               | 0.020         | 2.25E-29        |
| TC    | 2   | 21,213,193  | T  | C   | 0.275 | 0.054                | 0.008         | 4.10E-11        | 38467.6  | 0.291               | 0.301               | 0.021         | 7.87E-46        |
| TC    | 2   | 21,216,815  | A  | C   | 0.366 | 0.072                | 0.008         | 4.27E-21        | 38417.7  | 0.360               | 0.127               | 0.012         | 2.54E-24        |
| TC    | 2   | 21,217,490  | T  | C   | 0.477 | 0.024                | 0.007         | 1.04E-03        | 39908.8  | 0.520               | -0.449              | 0.020         | 3.69E-113       |
| TC    | 2   | 21,244,000  | T  | G   | 0.453 | 0.080                | 0.007         | 7.67E-28        | 38977.1  | 0.474               | 0.169               | 0.016         | 1.42E-25        |
| TC    | 2   | 21,291,529  | G  | A   | 0.182 | -0.109               | 0.010         | 2.31E-30        | 38227.2  | 0.138               | -0.099              | 0.010         | 2.90E-23        |
| TC    | 2   | 27,730,940  | T  | C   | 0.384 | 0.046                | 0.008         | 1.81E-09        | 37751    | 0.360               | 0.069               | 0.008         | 2.88E-19        |
| TC    | 2   | 44,072,576  | G  | T   | 0.313 | 0.072                | 0.009         | 2.56E-17        | 33165.6  | 0.313               | 0.072               | 0.009         | 2.92E-17        |
| TC    | 5   | 74,656,539  | C  | T   | 0.417 | 0.067                | 0.008         | 2.36E-19        | 37643.5  | 0.396               | 0.067               | 0.008         | 3.99E-19        |
| TC    | 5   | 156,443,066 | A  | G   | 0.372 | -0.050               | 0.008         | 2.18E-11        | 39229.2  | 0.346               | -0.050              | 0.008         | 2.24E-11        |
| TC    | 6   | 161,005,610 | T  | C   | 0.074 | 0.134                | 0.017         | 7.80E-16        | 27209.7  | 0.079               | 0.134               | 0.017         | 9.54E-16        |
| TC    | 7   | 21,613,842  | A  | G   | 0.245 | 0.052                | 0.009         | 1.09E-09        | 38006.3  | 0.248               | 0.052               | 0.009         | 1.30E-09        |
| TC    | 8   | 9,184,231   | G  | A   | 0.093 | -0.101               | 0.013         | 2.88E-15        | 37885.9  | 0.088               | -0.101              | 0.013         | 2.64E-15        |
| TC    | 8   | 59,392,324  | G  | A   | 0.352 | 0.043                | 0.008         | 3.48E-08        | 38165.3  | 0.324               | 0.043               | 0.008         | 2.97E-08        |
| TC    | 8   | 126,500,031 | G  | C   | 0.458 | -0.069               | 0.007         | 5.63E-22        | 40031.3  | 0.441               | -0.069              | 0.007         | 6.11E-22        |
| TC    | 9   | 107,661,742 | C  | A   | 0.273 | -0.058               | 0.008         | 3.77E-12        | 38042.9  | 0.246               | -0.058              | 0.008         | 3.14E-12        |
| TC    | 9   | 136,141,870 | T  | C   | 0.203 | 0.070                | 0.009         | 1.68E-14        | 38776.3  | 0.193               | 0.070               | 0.009         | 1.65E-14        |
| TC    | 11  | 61,557,803  | C  | T   | 0.342 | -0.071               | 0.008         | 8.10E-19        | 35790.4  | 0.359               | -0.071              | 0.008         | 6.83E-19        |
| TC    | 11  | 116,648,917 | G  | C   | 0.142 | 0.129                | 0.011         | 3.14E-31        | 34314.8  | 0.133               | 0.133               | 0.011         | 1.15E-32        |
| TC    | 11  | 117,052,107 | A  | G   | 0.024 | -0.164               | 0.030         | 2.83E-08        | 24889    | 0.020               | -0.180              | 0.030         | 1.03E-09        |
| TC    | 15  | 58,716,257  | A  | G   | 0.346 | 0.078                | 0.011         | 1.65E-12        | 18727.6  | 0.336               | 0.073               | 0.011         | 7.97E-11        |
| TC    | 15  | 58,726,744  | G  | C   | 0.223 | 0.059                | 0.009         | 4.17E-11        | 38026.1  | 0.200               | 0.054               | 0.009         | 1.87E-09        |
| TC    | 16  | 72,148,419  | G  | A   | 0.202 | 0.075                | 0.009         | 6.58E-16        | 38036.3  | 0.189               | 0.075               | 0.009         | 9.27E-16        |
| TC    | 17  | 67,081,278  | G  | A   | 0.034 | 0.140                | 0.025         | 1.29E-08        | 26960.2  | 0.030               | 0.140               | 0.025         | 1.34E-08        |
| TC    | 19  | 11,198,502  | C  | T   | 0.135 | -0.196               | 0.011         | 1.42E-70        | 38952    | 0.117               | -0.191              | 0.012         | 1.93E-61        |
| TC    | 19  | 11,227,480  | A  | C   | 0.430 | -0.065               | 0.007         | 5.65E-19        | 42297.5  | 0.411               | -0.071              | 0.008         | 4.38E-21        |
| TC    | 19  | 11,233,886  | T  | C   | 0.011 | 0.246                | 0.042         | 4.72E-09        | 28049.2  | 0.004               | 0.244               | 0.042         | 7.59E-09        |
| TC    | 19  | 11,248,104  | A  | G   | 0.035 | -0.066               | 0.021         | 1.26E-03        | 39417.2  | 0.029               | -0.144              | 0.021         | 7.47E-12        |
| TC    | 19  | 11,283,516  | A  | G   | 0.066 | -0.246               | 0.026         | 1.16E-21        | 13540.8  | 0.058               | -0.154              | 0.027         | 1.07E-08        |
| TC    | 19  | 18,302,239  | C  | T   | 0.282 | 0.033                | 0.008         | 4.43E-05        | 41610.2  | 0.286               | 0.058               | 0.008         | 1.79E-12        |
| TC    | 19  | 19,299,305  | T  | C   | 0.058 | 0.080                | 0.020         | 8.34E-05        | 24651.1  | 0.061               | 0.134               | 0.020         | 5.19E-11        |
| TC    | 19  | 19,447,352  | G  | A   | 0.052 | -0.160               | 0.019         | 2.28E-17        | 31245.2  | 0.038               | -0.148              | 0.019         | 7.50E-15        |
| TC    | 19  | 36,465,027  | C  | T   | 0.124 | 0.004                | 0.017         | 8.10E-01        | 18780.4  | 0.118               | -0.302              | 0.018         | 1.57E-65        |
| TC    | 19  | 36,488,326  | G  | A   | 0.049 | -0.048               | 0.022         | 2.67E-02        | 25541.2  | 0.053               | -0.359              | 0.022         | 2.50E-57        |
| TC    | 19  | 36,624,359  | A  | G   | 0.320 | -0.003               | 0.009         | 7.37E-01        | 29388.6  | 0.327               | -0.215              | 0.010         | 1.15E-99        |
| TC    | 19  | 37,226,329  | C  | A   | 0.010 | -0.019               | 0.053         | 7.18E-01        | 20511.6  | 0.016               | -0.825              | 0.056         | 1.73E-49        |
| TC    | 19  | 37,417,530  | C  | G   | 0.060 | -0.035               | 0.020         | 7.37E-02        | 25441.7  | 0.062               | -0.629              | 0.022         | 6.42E-188       |

|    |    |            |   |   |       |        |       |          |         |       |        |       |           |
|----|----|------------|---|---|-------|--------|-------|----------|---------|-------|--------|-------|-----------|
| TC | 19 | 38,683,266 | C | A | 0.030 | 0.039  | 0.026 | 1.37E-01 | 28099.5 | 0.027 | 0.832  | 0.029 | 3.25E-176 |
| TC | 19 | 38,790,635 | C | A | 0.124 | 0.019  | 0.015 | 1.98E-01 | 23594   | 0.135 | -0.309 | 0.017 | 4.47E-73  |
| TC | 19 | 38,853,659 | T | C | 0.169 | 0.002  | 0.010 | 8.67E-01 | 37235.3 | 0.183 | -0.135 | 0.012 | 3.34E-31  |
| TC | 19 | 38,990,336 | T | C | 0.052 | 0.037  | 0.018 | 4.22E-02 | 33829.3 | 0.046 | 0.390  | 0.020 | 1.17E-86  |
| TC | 19 | 39,043,586 | A | C | 0.110 | 0.004  | 0.015 | 8.06E-01 | 26266.9 | 0.103 | 0.431  | 0.016 | 2.39E-154 |
| TC | 19 | 39,538,538 | T | G | 0.077 | 0.007  | 0.020 | 7.18E-01 | 19039.8 | 0.072 | 0.506  | 0.022 | 3.61E-115 |
| TC | 19 | 39,609,053 | C | T | 0.051 | 0.029  | 0.019 | 1.25E-01 | 32944.1 | 0.051 | 0.341  | 0.020 | 2.37E-66  |
| TC | 19 | 39,862,881 | T | C | 0.447 | 0.012  | 0.008 | 1.42E-01 | 32497.9 | 0.435 | 0.072  | 0.009 | 1.15E-15  |
| TC | 19 | 39,955,515 | T | C | 0.094 | 0.049  | 0.015 | 7.39E-04 | 30928.3 | 0.088 | 0.499  | 0.016 | 9.04E-206 |
| TC | 19 | 40,102,981 | A | T | 0.042 | -0.032 | 0.022 | 1.51E-01 | 27908.7 | 0.038 | -0.523 | 0.024 | 3.07E-101 |
| TC | 19 | 40,281,184 | A | G | 0.199 | 0.007  | 0.010 | 5.01E-01 | 35400   | 0.177 | -0.263 | 0.012 | 5.28E-102 |
| TC | 19 | 40,339,715 | G | A | 0.239 | 0.003  | 0.010 | 7.38E-01 | 32981.3 | 0.257 | 0.390  | 0.012 | 3.50E-215 |
| TC | 19 | 40,363,916 | T | C | 0.038 | -0.037 | 0.025 | 1.34E-01 | 25094.2 | 0.040 | -0.962 | 0.028 | 1.95E-262 |
| TC | 19 | 41,029,820 | T | C | 0.421 | 0.008  | 0.008 | 2.97E-01 | 38304.6 | 0.373 | 0.203  | 0.008 | 2.97E-130 |
| TC | 19 | 41,506,953 | A | C | 0.417 | -0.009 | 0.009 | 3.12E-01 | 26330.2 | 0.394 | 0.166  | 0.010 | 1.64E-62  |
| TC | 19 | 41,582,932 | A | G | 0.075 | 0.009  | 0.020 | 6.36E-01 | 20531.5 | 0.069 | -0.548 | 0.022 | 1.85E-138 |
| TC | 19 | 41,974,444 | G | C | 0.070 | 0.025  | 0.018 | 1.65E-01 | 26134.7 | 0.064 | 0.107  | 0.019 | 2.23E-08  |
| TC | 19 | 42,275,422 | A | G | 0.044 | 0.012  | 0.020 | 5.72E-01 | 31685.4 | 0.056 | 0.264  | 0.031 | 2.62E-17  |
| TC | 19 | 42,382,317 | T | A | 0.042 | 0.013  | 0.022 | 5.53E-01 | 27909.5 | 0.053 | 0.770  | 0.044 | 1.57E-67  |
| TC | 19 | 42,460,653 | A | G | 0.050 | 0.001  | 0.021 | 9.62E-01 | 26123.6 | 0.059 | -0.384 | 0.034 | 2.86E-30  |
| TC | 19 | 43,896,450 | A | G | 0.136 | -0.035 | 0.013 | 5.54E-03 | 29159.5 | 0.138 | -0.285 | 0.014 | 3.16E-94  |
| TC | 19 | 44,460,205 | G | A | 0.188 | 0.006  | 0.011 | 6.03E-01 | 30024.7 | 0.204 | -0.267 | 0.012 | 8.85E-104 |
| TC | 19 | 44,803,373 | T | C | 0.044 | -0.030 | 0.023 | 1.97E-01 | 24873.3 | 0.054 | -0.534 | 0.026 | 1.98E-97  |
| TC | 19 | 44,902,030 | G | C | 0.336 | 0.005  | 0.010 | 6.06E-01 | 24315   | 0.364 | -0.314 | 0.013 | 1.97E-124 |
| TC | 19 | 44,927,778 | C | T | 0.447 | 0.020  | 0.010 | 5.38E-02 | 21098.5 | 0.455 | 0.202  | 0.013 | 1.98E-55  |
| TC | 19 | 45,033,193 | T | C | 0.408 | -0.019 | 0.008 | 1.67E-02 | 34922.2 | 0.404 | -0.067 | 0.009 | 1.83E-14  |
| TC | 19 | 45,040,191 | T | C | 0.101 | 0.033  | 0.019 | 8.44E-02 | 16750   | 0.086 | 0.599  | 0.022 | 1.00E-164 |
| TC | 19 | 45,302,504 | A | G | 0.026 | -0.502 | 0.035 | 1.04E-47 | 18253.1 | 0.020 | -1.020 | 0.044 | 2.83E-116 |
| TC | 19 | 45,328,379 | A | T | 0.184 | 0.144  | 0.013 | 4.57E-27 | 20439.8 | 0.175 | 0.187  | 0.016 | 1.07E-30  |
| TC | 19 | 45,345,283 | C | A | 0.012 | 0.224  | 0.046 | 1.35E-06 | 21150.7 | 0.013 | 0.974  | 0.052 | 8.14E-77  |
| TC | 19 | 45,351,516 | G | C | 0.056 | 0.220  | 0.022 | 1.28E-24 | 22506.6 | 0.045 | 0.591  | 0.029 | 2.09E-93  |
| TC | 19 | 45,359,706 | A | G | 0.296 | 0.115  | 0.009 | 6.58E-39 | 34106.9 | 0.270 | 0.185  | 0.011 | 5.20E-62  |
| TC | 19 | 45,369,203 | A | G | 0.049 | -0.309 | 0.020 | 2.07E-52 | 28590.9 | 0.053 | -0.268 | 0.030 | 3.88E-19  |
| TC | 19 | 45,370,571 | A | G | 0.285 | -0.050 | 0.012 | 2.38E-05 | 19819.2 | 0.261 | -0.074 | 0.013 | 3.00E-08  |
| TC | 19 | 45,382,675 | A | G | 0.045 | -0.370 | 0.020 | 4.51E-79 | 32692.3 | 0.038 | -1.253 | 0.031 | 0.00E+00  |
| TC | 19 | 45,418,486 | A | G | 0.036 | 0.329  | 0.032 | 2.51E-24 | 15348   | 0.027 | 0.437  | 0.040 | 2.39E-28  |
| TC | 19 | 45,422,946 | G | A | 0.197 | 0.197  | 0.011 | 9.09E-78 | 31419.8 | 0.200 | 0.394  | 0.024 | 1.69E-59  |
| TC | 19 | 45,423,636 | A | G | 0.385 | 0.052  | 0.009 | 7.64E-09 | 29471.1 | 0.351 | 0.351  | 0.011 | 1.90E-207 |
| TC | 19 | 45,423,944 | T | C | 0.021 | -0.428 | 0.036 | 7.98E-33 | 20553   | 0.016 | -0.908 | 0.051 | 1.12E-70  |
| TC | 19 | 45,426,792 | A | G | 0.068 | -0.391 | 0.019 | 6.25E-96 | 24411.8 | 0.062 | -0.974 | 0.033 | 1.44E-191 |
| TC | 19 | 45,428,234 | A | G | 0.171 | 0.205  | 0.012 | 5.59E-71 | 29189.9 | 0.164 | 0.449  | 0.027 | 1.80E-63  |
| TC | 19 | 45,742,011 | G | C | 0.281 | -0.018 | 0.009 | 4.87E-02 | 34565.3 | 0.253 | 0.225  | 0.010 | 5.62E-105 |
| TC | 19 | 45,762,886 | G | A | 0.248 | 0.009  | 0.010 | 3.70E-01 | 29131   | 0.254 | 0.456  | 0.013 | 5.08E-281 |
| TC | 19 | 45,788,381 | A | G | 0.033 | -0.082 | 0.030 | 6.03E-03 | 19483.9 | 0.029 | -0.202 | 0.032 | 3.10E-10  |
| TC | 19 | 46,871,175 | T | G | 0.013 | 0.115  | 0.044 | 8.86E-03 | 22375.4 | 0.014 | 1.038  | 0.049 | 9.36E-101 |
| TC | 19 | 46,923,126 | T | C | 0.015 | -0.100 | 0.034 | 3.64E-03 | 32471.7 | 0.015 | -0.695 | 0.038 | 4.83E-76  |
| TC | 19 | 47,083,034 | T | C | 0.010 | -0.062 | 0.060 | 3.04E-01 | 16003.8 | 0.012 | -1.595 | 0.065 | 5.71E-133 |
| TC | 19 | 47,305,760 | G | T | 0.056 | 0.011  | 0.021 | 5.84E-01 | 24089.6 | 0.069 | 0.694  | 0.024 | 2.89E-182 |
| TC | 19 | 47,809,218 | G | A | 0.136 | 0.012  | 0.015 | 4.50E-01 | 20095.9 | 0.135 | -0.398 | 0.017 | 4.22E-122 |
| TC | 19 | 48,375,023 | A | G | 0.013 | -0.053 | 0.044 | 2.31E-01 | 21783.2 | 0.014 | -0.471 | 0.047 | 1.47E-23  |
| TC | 19 | 49,090,982 | C | T | 0.271 | 0.005  | 0.009 | 5.87E-01 | 33846.2 | 0.235 | 0.180  | 0.010 | 2.27E-73  |
| TC | 19 | 49,124,991 | C | G | 0.068 | -0.050 | 0.018 | 3.97E-03 | 28664.3 | 0.068 | -0.156 | 0.019 | 6.16E-17  |
| TC | 19 | 49,717,516 | C | T | 0.136 | 0.006  | 0.012 | 6.45E-01 | 30709.4 | 0.147 | 0.340  | 0.014 | 4.13E-136 |

|    |    |            |   |   |       |        |       |          |         |       |        |       |           |
|----|----|------------|---|---|-------|--------|-------|----------|---------|-------|--------|-------|-----------|
| TC | 19 | 50,055,223 | G | A | 0.053 | 0.002  | 0.022 | 9.39E-01 | 24070   | 0.050 | 0.129  | 0.023 | 3.70E-08  |
| TC | 19 | 50,750,419 | C | T | 0.193 | -0.012 | 0.010 | 2.19E-01 | 36226.9 | 0.177 | -0.290 | 0.011 | 2.36E-159 |
| TC | 19 | 50,929,119 | G | A | 0.317 | 0.003  | 0.010 | 7.69E-01 | 23622.4 | 0.335 | 0.368  | 0.012 | 1.61E-214 |
| TC | 19 | 51,132,097 | C | T | 0.083 | -0.061 | 0.021 | 3.84E-03 | 16361   | 0.090 | -0.595 | 0.023 | 1.39E-148 |
| TC | 19 | 51,179,712 | A | G | 0.495 | 0.018  | 0.007 | 1.62E-02 | 40427.8 | 0.486 | 0.063  | 0.008 | 5.98E-16  |
| TC | 19 | 51,301,057 | C | T | 0.032 | -0.040 | 0.027 | 1.44E-01 | 23971.9 | 0.037 | -0.567 | 0.030 | 8.23E-82  |
| TC | 19 | 51,334,355 | T | C | 0.053 | -0.005 | 0.021 | 8.04E-01 | 26286.5 | 0.048 | 0.482  | 0.022 | 1.94E-103 |
| TC | 19 | 51,739,226 | A | G | 0.379 | -0.010 | 0.009 | 2.62E-01 | 28387.4 | 0.390 | -0.236 | 0.010 | 9.28E-125 |
| TC | 19 | 51,981,485 | G | A | 0.024 | 0.029  | 0.030 | 3.27E-01 | 26569.7 | 0.021 | 0.477  | 0.032 | 5.64E-51  |
| TC | 19 | 52,095,122 | T | C | 0.011 | -0.060 | 0.048 | 2.07E-01 | 22863.4 | 0.012 | -1.112 | 0.051 | 3.28E-104 |
| TC | 19 | 52,135,776 | T | G | 0.315 | 0.015  | 0.011 | 1.80E-01 | 19731.8 | 0.296 | -0.191 | 0.018 | 9.49E-28  |
| TC | 19 | 52,147,969 | T | C | 0.326 | 0.021  | 0.011 | 5.43E-02 | 21184.1 | 0.318 | 0.433  | 0.017 | 3.41E-137 |
| TC | 19 | 52,204,328 | C | A | 0.026 | 0.006  | 0.029 | 8.27E-01 | 26649   | 0.025 | 0.625  | 0.031 | 7.24E-88  |
| TC | 19 | 52,513,871 | T | A | 0.004 | 0.003  | 0.075 | 9.65E-01 | 23842.9 | 0.006 | -1.041 | 0.079 | 2.66E-39  |
| TC | 19 | 52,665,260 | G | A | 0.342 | -0.001 | 0.009 | 9.14E-01 | 27838.5 | 0.367 | -0.230 | 0.010 | 3.86E-109 |
| TC | 19 | 52,846,742 | G | A | 0.154 | 0.014  | 0.011 | 2.00E-01 | 37746.8 | 0.142 | 0.102  | 0.011 | 3.39E-20  |
| TC | 19 | 53,112,249 | C | G | 0.223 | 0.024  | 0.011 | 1.97E-02 | 28930.2 | 0.237 | 0.318  | 0.012 | 1.07E-164 |
| TC | 19 | 53,149,057 | A | C | 0.300 | 0.001  | 0.009 | 8.72E-01 | 34827.1 | 0.288 | 0.187  | 0.009 | 2.22E-87  |
| TC | 19 | 53,783,085 | T | G | 0.008 | -0.028 | 0.051 | 5.80E-01 | 26813   | 0.007 | 1.038  | 0.055 | 1.36E-78  |
| TC | 19 | 53,836,862 | A | G | 0.443 | -0.001 | 0.008 | 9.41E-01 | 35946.7 | 0.430 | 0.158  | 0.008 | 6.20E-79  |
| TC | 19 | 54,266,412 | C | T | 0.283 | -0.017 | 0.012 | 1.47E-01 | 19280.2 | 0.258 | -0.210 | 0.013 | 6.46E-60  |
| TC | 19 | 54,295,344 | G | T | 0.440 | 0.012  | 0.008 | 1.51E-01 | 31835.2 | 0.450 | 0.284  | 0.009 | 7.38E-199 |
| TC | 19 | 54,522,887 | A | G | 0.278 | 0.016  | 0.009 | 8.25E-02 | 33288.3 | 0.226 | 0.089  | 0.009 | 3.33E-21  |
| TC | 19 | 54,643,612 | C | T | 0.015 | 0.016  | 0.041 | 7.02E-01 | 22837.7 | 0.025 | -0.567 | 0.043 | 2.80E-39  |
| TC | 19 | 54,661,559 | A | G | 0.321 | -0.013 | 0.008 | 1.09E-01 | 37768.6 | 0.334 | -0.220 | 0.009 | 1.58E-131 |
| TC | 19 | 54,753,823 | G | A | 0.077 | -0.023 | 0.021 | 2.69E-01 | 18463.6 | 0.084 | -0.619 | 0.022 | 5.82E-168 |
| TC | 19 | 54,827,040 | C | A | 0.141 | 0.033  | 0.016 | 3.58E-02 | 19027.1 | 0.128 | 0.519  | 0.017 | 5.07E-201 |
| TC | 19 | 55,021,466 | A | G | 0.200 | 0.007  | 0.011 | 5.14E-01 | 29612   | 0.213 | 0.382  | 0.012 | 5.16E-216 |
| TC | 19 | 55,029,298 | T | A | 0.182 | -0.004 | 0.014 | 7.65E-01 | 20125.4 | 0.164 | 0.581  | 0.016 | 1.61E-285 |
| TC | 19 | 55,395,951 | G | C | 0.063 | -0.043 | 0.020 | 3.31E-02 | 22591.9 | 0.055 | -0.279 | 0.022 | 6.43E-38  |
| TC | 19 | 55,509,644 | G | C | 0.013 | 0.018  | 0.056 | 7.45E-01 | 13953.4 | 0.015 | -0.814 | 0.058 | 8.62E-45  |
| TC | 19 | 55,698,183 | C | T | 0.101 | -0.027 | 0.013 | 3.32E-02 | 37887.8 | 0.094 | -0.289 | 0.014 | 6.97E-100 |
| TC | 19 | 56,990,010 | T | C | 0.212 | -0.008 | 0.009 | 4.07E-01 | 39088.5 | 0.202 | -0.183 | 0.010 | 4.21E-79  |
| TC | 20 | 17,845,072 | G | C | 0.164 | 0.062  | 0.011 | 5.04E-08 | 29822.7 | 0.145 | 0.062  | 0.011 | 4.60E-08  |
| TC | 20 | 39,960,342 | A | G | 0.407 | 0.046  | 0.008 | 7.79E-10 | 38467.2 | 0.398 | 0.046  | 0.008 | 7.42E-10  |

**Supplementary Table 5. Independent variants associated with TG after discovery phase.**

EA: effect allele. NEA: non-effect allele. MAF and MAF<sub>GoNL</sub>: the minor allele frequency of the effect allele in the discovery cohorts and in the GoNL reference panel. *N*: estimated effective sample size, determined by GCTA.

| Trait | Chr | Position    | EA | NEA | MAF   | After METAL analysis |               |                 | <i>N</i> | MAF <sub>GoNL</sub> | After GCTA analysis |               |                 |
|-------|-----|-------------|----|-----|-------|----------------------|---------------|-----------------|----------|---------------------|---------------------|---------------|-----------------|
|       |     |             |    |     |       | $\beta$              | SE $_{\beta}$ | <i>p</i> -value |          |                     | $\beta$             | SE $_{\beta}$ | <i>p</i> -value |
| TG    | 1   | 63,094,692  | G  | A   | 0.330 | -0.016               | 0.003         | 8.81E-11        | 39668    | 0.369               | -0.016              | 0.003         | 1.59E-10        |
| TG    | 2   | 21,226,560  | A  | G   | 0.220 | -0.023               | 0.003         | 2.93E-13        | 32984.5  | 0.223               | -0.028              | 0.003         | 9.95E-19        |
| TG    | 2   | 27,752,463  | G  | A   | 0.360 | 0.030                | 0.003         | 1.51E-30        | 34870.3  | 0.353               | 0.033               | 0.003         | 9.29E-36        |
| TG    | 7   | 72,854,549  | T  | C   | 0.081 | -0.040               | 0.005         | 2.76E-14        | 26192.3  | 0.088               | -0.040              | 0.005         | 3.55E-14        |
| TG    | 8   | 19,785,656  | A  | G   | 0.022 | 0.098                | 0.017         | 3.18E-09        | 9434.26  | 0.020               | 0.092               | 0.017         | 2.66E-08        |
| TG    | 8   | 19,793,581  | T  | C   | 0.024 | 0.091                | 0.011         | 1.93E-17        | 20206.7  | 0.028               | 0.092               | 0.011         | 1.55E-17        |
| TG    | 8   | 19,824,563  | C  | T   | 0.078 | -0.053               | 0.005         | 3.64E-28        | 32831.8  | 0.119               | -0.051              | 0.005         | 6.40E-26        |
| TG    | 8   | 126,500,031 | G  | C   | 0.457 | -0.018               | 0.002         | 2.10E-14        | 38228.8  | 0.441               | -0.018              | 0.002         | 3.52E-14        |
| TG    | 11  | 116,648,917 | G  | C   | 0.132 | 0.060                | 0.004         | 1.81E-49        | 28060    | 0.133               | 0.056               | 0.004         | 2.29E-41        |
| TG    | 11  | 117,075,566 | T  | C   | 0.071 | 0.072                | 0.009         | 2.82E-16        | 10650.9  | 0.071               | 0.052               | 0.009         | 8.41E-09        |
| TG    | 17  | 41,874,745  | A  | C   | 0.032 | 0.066                | 0.011         | 1.67E-09        | 15125    | 0.029               | 0.066               | 0.011         | 1.55E-09        |
| TG    | 19  | 8,627,569   | T  | C   | 0.016 | -0.143               | 0.025         | 8.02E-09        | 5947.35  | 0.007               | -0.143              | 0.025         | 8.31E-09        |
| TG    | 19  | 19,379,549  | T  | C   | 0.060 | -0.052               | 0.006         | 3.36E-16        | 24617.2  | 0.064               | -0.052              | 0.006         | 4.30E-16        |
| TG    | 19  | 45,390,333  | G  | A   | 0.172 | 0.031                | 0.004         | 2.12E-15        | 27788.7  | 0.226               | 0.024               | 0.004         | 4.10E-10        |
| TG    | 19  | 45,414,399  | A  | C   | 0.100 | 0.064                | 0.007         | 2.45E-22        | 14894.1  | 0.112               | 0.050               | 0.007         | 9.49E-14        |
| TG    | 19  | 45,430,280  | C  | G   | 0.437 | -0.028               | 0.004         | 1.56E-12        | 14479.2  | 0.439               | -0.026              | 0.004         | 1.27E-10        |

**Supplementary Table 6. Replication of the loci identified by Teslovich *et al.*<sup>[1]</sup> in the meta-analysis of the discovery cohorts.**

$\beta$  is the effect size of the effect allele per mmol per Liter.

| Trait | SNP        | Chr | Position    | Teslovich <i>et al.</i> (2010) |         |               |                 | This study |         |               |                 | replicated? |
|-------|------------|-----|-------------|--------------------------------|---------|---------------|-----------------|------------|---------|---------------|-----------------|-------------|
|       |            |     |             | MAF                            | $\beta$ | SE $_{\beta}$ | <i>p</i> -value | MAF        | $\beta$ | SE $_{\beta}$ | <i>p</i> -value |             |
| HDL   | rs3764261  | 16  | 56,993,324  | 0.320                          | -0.088  | 0.090         | 7.0E-380        | 0.330      | -0.092  | 0.003         | 5.50E-176       | y           |
| LDL   | rs4420638  | 19  | 45,422,946  | 0.170                          | -0.185  | 0.290         | 8.72E-147       | 0.195      | -0.227  | 0.010         | 9.21E-116       | y           |
| TC    | rs4420638  | 19  | 45,422,946  | 0.170                          | -0.177  | 0.320         | 5.20E-111       | 0.197      | -0.197  | 0.011         | 9.09E-78        | y           |
| LDL   | rs6511720  | 19  | 11,202,306  | 0.110                          | 0.181   | 0.300         | 4.28E-117       | 0.130      | 0.198   | 0.011         | 1.11E-76        | y           |
| TC    | rs6511720  | 19  | 11,202,306  | 0.110                          | 0.184   | 0.340         | 6.65E-97        | 0.131      | 0.195   | 0.011         | 6.22E-67        | y           |
| LDL   | rs629301   | 1   | 109,818,306 | 0.220                          | 0.146   | 0.210         | 9.70E-171       | 0.236      | 0.134   | 0.009         | 1.55E-56        | y           |
| TG    | rs964184   | 11  | 116,648,917 | 0.130                          | -0.186  | 0.480         | 6.71E-240       | 0.132      | -0.060  | 0.004         | 1.81E-49        | y           |
| TC    | rs629301   | 1   | 109,818,306 | 0.220                          | 0.140   | 0.240         | 5.77E-131       | 0.239      | 0.126   | 0.009         | 8.82E-45        | y           |
| HDL   | rs1532085  | 15  | 58,683,366  | 0.390                          | -0.038  | 0.080         | 2.92E-96        | 0.388      | -0.044  | 0.003         | 8.00E-43        | y           |
| HDL   | rs12678919 | 8   | 19,844,222  | 0.120                          | -0.058  | 0.120         | 9.71E-98        | 0.102      | -0.066  | 0.005         | 3.31E-38        | y           |
| LDL   | rs1367117  | 2   | 21,263,900  | 0.300                          | -0.105  | 0.190         | 4.48E-114       | 0.324      | -0.088  | 0.007         | 1.16E-32        | y           |
| TC    | rs964184   | 11  | 116,648,917 | 0.130                          | -0.121  | 0.290         | 6.21E-57        | 0.142      | -0.129  | 0.011         | 3.14E-31        | y           |
| TC    | rs1367117  | 2   | 21,263,900  | 0.300                          | -0.108  | 0.220         | 4.08E-96        | 0.326      | -0.088  | 0.008         | 3.77E-29        | y           |
| TC    | rs3850634  | 1   | 63,050,598  | 0.320                          | 0.067   | 0.200         | 4.90E-41        | 0.365      | 0.081   | 0.008         | 2.27E-27        | y           |
| TG    | rs1260326  | 2   | 27,730,940  | 0.410                          | -0.096  | 0.400         | 5.68E-133       | 0.379      | -0.027  | 0.003         | 1.57E-26        | y           |
| LDL   | rs964184   | 11  | 116,648,917 | 0.130                          | -0.074  | 0.270         | 1.47E-26        | 0.139      | -0.099  | 0.011         | 3.68E-21        | y           |
| TG    | rs12678919 | 8   | 19,844,222  | 0.120                          | 0.150   | 0.650         | 1.50E-115       | 0.098      | 0.039   | 0.004         | 1.39E-20        | y           |
| LDL   | rs12916    | 5   | 74,656,539  | 0.390                          | -0.063  | 0.180         | 5.12E-45        | 0.415      | -0.066  | 0.007         | 1.44E-20        | y           |
| TC    | rs12916    | 5   | 74,656,539  | 0.390                          | -0.074  | 0.200         | 8.79E-47        | 0.417      | -0.067  | 0.008         | 2.36E-19        | y           |
| HDL   | rs4420638  | 19  | 45,422,946  | 0.170                          | 0.027   | 0.120         | 4.40E-21        | 0.187      | 0.039   | 0.004         | 2.41E-19        | y           |
| HDL   | rs964184   | 11  | 116,648,917 | 0.130                          | 0.039   | 0.110         | 5.21E-47        | 0.133      | 0.041   | 0.005         | 1.00E-18        | y           |
| LDL   | rs4299376  | 2   | 44,072,576  | 0.300                          | -0.071  | 0.200         | 1.73E-47        | 0.311      | -0.070  | 0.008         | 2.55E-18        | y           |
| HDL   | rs7241918  | 18  | 47,160,953  | 0.170                          | 0.034   | 0.100         | 2.73E-49        | 0.163      | 0.035   | 0.004         | 3.46E-18        | y           |
| TC    | rs10401969 | 19  | 19,407,718  | 0.070                          | 0.123   | 0.420         | 2.90E-38        | 0.080      | 0.120   | 0.014         | 4.67E-18        | y           |
| TC    | rs4299376  | 2   | 44,072,576  | 0.300                          | -0.078  | 0.220         | 4.03E-45        | 0.313      | -0.072  | 0.009         | 2.56E-17        | y           |
| TC    | rs174550   | 11  | 61,571,478  | 0.340                          | 0.046   | 0.200         | 2.08E-22        | 0.343      | 0.066   | 0.008         | 4.32E-17        | y           |
| LDL   | rs10401969 | 19  | 19,407,718  | 0.070                          | 0.081   | 0.380         | 6.69E-22        | 0.079      | 0.107   | 0.013         | 2.05E-16        | y           |
| LDL   | rs174583   | 11  | 61,609,750  | 0.350                          | 0.044   | 0.190         | 1.17E-21        | 0.349      | 0.059   | 0.007         | 2.83E-16        | y           |
| HDL   | rs1883025  | 9   | 107,664,301 | 0.250                          | 0.024   | 0.090         | 1.75E-33        | 0.250      | 0.028   | 0.004         | 4.92E-16        | y           |
| TC    | rs2954022  | 8   | 126,482,621 | 0.460                          | 0.060   | 0.190         | 5.02E-36        | 0.494      | 0.056   | 0.007         | 4.59E-15        | y           |
| TC    | rs2126259  | 8   | 9,185,146   | 0.100                          | 0.081   | 0.320         | 8.98E-24        | 0.106      | 0.095   | 0.012         | 9.39E-15        | y           |
| LDL   | rs2954022  | 8   | 126,482,621 | 0.460                          | 0.048   | 0.170         | 2.59E-29        | 0.493      | 0.051   | 0.007         | 2.57E-14        | y           |
| LDL   | rs3850634  | 1   | 63,050,598  | 0.320                          | 0.041   | 0.190         | 2.63E-18        | 0.363      | 0.053   | 0.007         | 6.84E-14        | y           |
| LDL   | rs2479409  | 1   | 55,504,650  | 0.300                          | -0.052  | 0.220         | 1.93E-28        | 0.350      | -0.058  | 0.008         | 1.94E-13        | y           |
| TG    | rs1042034  | 2   | 21,225,281  | 0.220                          | 0.066   | 0.450         | 1.36E-45        | 0.220      | 0.023   | 0.003         | 3.08E-13        | y           |
| TC    | rs514230   | 1   | 234,858,597 | 0.480                          | 0.035   | 0.200         | 5.37E-14        | 0.480      | 0.052   | 0.007         | 4.97E-13        | y           |
| TC    | rs651007   | 9   | 136,153,875 | 0.210                          | -0.060  | 0.250         | 8.66E-21        | 0.217      | -0.064  | 0.009         | 6.58E-13        | y           |
| TG    | rs7811265  | 7   | 72,934,510  | 0.190                          | 0.087   | 0.500         | 9.06E-59        | 0.177      | 0.025   | 0.004         | 1.21E-12        | y           |
| HDL   | rs386000   | 19  | 54,792,761  | 0.200                          | -0.021  | 0.110         | 4.29E-16        | 0.203      | -0.028  | 0.004         | 1.23E-12        | y           |
| TG    | rs2954029  | 8   | 126,490,972 | 0.470                          | 0.062   | 0.390         | 3.29E-55        | 0.485      | 0.017   | 0.002         | 3.13E-12        | y           |
| HDL   | rs6065906  | 20  | 44,554,015  | 0.180                          | 0.024   | 0.100         | 1.90E-22        | 0.194      | 0.027   | 0.004         | 3.20E-12        | y           |
| HDL   | rs1042034  | 2   | 21,225,281  | 0.220                          | -0.023  | 0.090         | 1.22E-30        | 0.218      | -0.025  | 0.004         | 3.87E-12        | y           |
| TC    | rs2000999  | 16  | 72,108,093  | 0.200                          | -0.061  | 0.240         | 3.22E-24        | 0.195      | -0.067  | 0.010         | 5.90E-12        | y           |
| TC    | rs1883025  | 9   | 107,664,301 | 0.250                          | 0.058   | 0.240         | 3.39E-27        | 0.260      | 0.058   | 0.009         | 7.68E-12        | y           |
| TG    | rs10401969 | 19  | 19,407,718  | 0.070                          | 0.086   | 0.820         | 1.61E-29        | 0.065      | 0.033   | 0.005         | 1.78E-11        | y           |
| TC    | rs2479409  | 1   | 55,504,650  | 0.300                          | -0.051  | 0.240         | 3.84E-24        | 0.351      | -0.055  | 0.008         | 3.64E-11        | y           |
| LDL   | rs514230   | 1   | 234,858,597 | 0.480                          | 0.029   | 0.180         | 9.38E-12        | 0.478      | 0.045   | 0.007         | 4.01E-11        | y           |

|     |            |    |             |       |        |       |          |       |        |       |          |   |
|-----|------------|----|-------------|-------|--------|-------|----------|-------|--------|-------|----------|---|
| TG  | rs439401   | 19 | 45,414,451  | 0.360 | 0.061  | 0.440 | 1.14E-30 | 0.287 | 0.019  | 0.003 | 6.38E-11 | y |
| LDL | rs649129   | 9  | 136,154,304 | 0.220 | -0.053 | 0.210 | 7.85E-22 | 0.215 | -0.054 | 0.008 | 8.13E-11 | y |
| LDL | rs2000999  | 16 | 72,108,093  | 0.200 | -0.052 | 0.220 | 1.75E-22 | 0.193 | -0.060 | 0.009 | 8.17E-11 | y |
| LDL | rs2126259  | 8  | 9,185,146   | 0.100 | 0.057  | 0.290 | 7.43E-15 | 0.105 | 0.075  | 0.012 | 8.64E-11 | y |
| HDL | rs9987289  | 8  | 9,183,358   | 0.090 | 0.031  | 0.130 | 6.40E-25 | 0.088 | 0.034  | 0.005 | 9.15E-11 | y |
| LDL | rs6882076  | 5  | 156,390,297 | 0.350 | 0.043  | 0.190 | 1.89E-22 | 0.385 | 0.045  | 0.007 | 3.16E-10 | y |
| TG  | rs13238203 | 7  | 72,129,667  | 0.040 | 0.087  | 1.340 | 1.13E-09 | 0.040 | 0.079  | 0.013 | 4.68E-10 | y |
| TC  | rs6882076  | 5  | 156,390,297 | 0.350 | 0.051  | 0.200 | 7.46E-28 | 0.387 | 0.047  | 0.008 | 7.59E-10 | y |
| HDL | rs16942887 | 16 | 67,928,042  | 0.120 | -0.033 | 0.110 | 8.39E-33 | 0.131 | -0.027 | 0.005 | 1.47E-09 | y |
| TC  | rs1260326  | 2  | 27,730,940  | 0.410 | -0.049 | 0.190 | 7.31E-27 | 0.384 | -0.046 | 0.008 | 1.81E-09 | y |
| HDL | rs4846914  | 1  | 230,295,691 | 0.400 | 0.016  | 0.070 | 3.66E-21 | 0.413 | 0.020  | 0.003 | 2.44E-09 | y |
| TG  | rs2131925  | 1  | 63,025,942  | 0.320 | 0.054  | 0.400 | 8.84E-43 | 0.333 | 0.015  | 0.003 | 2.45E-09 | y |
| TC  | rs4297946  | 20 | 39,811,275  | 0.470 | -0.039 | 0.190 | 2.76E-17 | 0.483 | -0.043 | 0.007 | 4.74E-09 | y |
| TC  | rs12027135 | 1  | 25,775,733  | 0.470 | 0.032  | 0.190 | 4.12E-11 | 0.462 | 0.042  | 0.007 | 5.08E-09 | y |
| HDL | rs1800961  | 20 | 43,042,364  | 0.030 | 0.049  | 0.240 | 1.05E-15 | 0.037 | 0.052  | 0.009 | 8.65E-09 | y |
| TC  | rs1532085  | 15 | 58,683,366  | 0.390 | -0.040 | 0.200 | 8.83E-20 | 0.399 | -0.044 | 0.008 | 9.77E-09 | y |
| LDL | rs12027135 | 1  | 25,775,733  | 0.470 | 0.028  | 0.180 | 1.24E-10 | 0.460 | 0.039  | 0.007 | 1.57E-08 | y |
| HDL | rs174601   | 11 | 61,623,140  | 0.360 | 0.019  | 0.080 | 1.50E-22 | 0.342 | 0.018  | 0.003 | 1.90E-08 | y |
| HDL | rs838880   | 12 | 125,261,593 | 0.310 | -0.016 | 0.090 | 2.58E-14 | 0.346 | -0.018 | 0.003 | 2.40E-08 | y |
| HDL | rs1515100  | 2  | 227,128,917 | 0.370 | -0.012 | 0.080 | 2.01E-09 | 0.381 | -0.017 | 0.003 | 2.55E-08 | y |
| HDL | rs10808546 | 8  | 126,495,818 | 0.440 | -0.016 | 0.070 | 6.35E-19 | 0.463 | -0.017 | 0.003 | 4.40E-08 | y |
| TC  | rs1030431  | 8  | 59,311,697  | 0.350 | -0.033 | 0.200 | 8.79E-13 | 0.349 | -0.042 | 0.008 | 8.16E-08 | y |
| HDL | rs2925979  | 16 | 81,534,790  | 0.300 | 0.012  | 0.080 | 2.09E-11 | 0.332 | 0.018  | 0.003 | 1.19E-07 | y |
| TG  | rs261342   | 15 | 58,731,153  | 0.220 | -0.033 | 0.450 | 2.42E-13 | 0.194 | -0.018 | 0.003 | 1.20E-07 | y |
| LDL | rs12670798 | 7  | 21,607,352  | 0.230 | -0.033 | 0.200 | 6.88E-10 | 0.242 | -0.043 | 0.008 | 2.41E-07 | y |
| LDL | rs1030431  | 8  | 59,311,697  | 0.350 | -0.025 | 0.180 | 3.86E-09 | 0.347 | -0.038 | 0.007 | 2.56E-07 | y |
| LDL | rs909802   | 20 | 39,936,815  | 0.470 | -0.037 | 0.170 | 3.18E-19 | 0.485 | -0.035 | 0.007 | 2.57E-07 | y |
| LDL | rs11136341 | 8  | 145,043,543 | 0.400 | -0.036 | 0.210 | 4.44E-13 | 0.381 | -0.037 | 0.007 | 3.55E-07 | y |
| HDL | rs643531   | 9  | 15,296,034  | 0.140 | 0.019  | 0.100 | 1.30E-13 | 0.151 | 0.021  | 0.004 | 6.82E-07 | y |
| TC  | rs7206971  | 17 | 45,425,115  | 0.490 | -0.026 | 0.200 | 1.05E-08 | 0.451 | -0.037 | 0.008 | 1.27E-06 | y |
| HDL | rs1689800  | 1  | 182,168,885 | 0.350 | 0.012  | 0.080 | 3.18E-10 | 0.349 | 0.015  | 0.003 | 1.65E-06 | y |
| HDL | rs4660293  | 1  | 40,028,180  | 0.230 | 0.012  | 0.090 | 3.99E-10 | 0.268 | 0.017  | 0.004 | 1.84E-06 | y |
| HDL | rs13107325 | 4  | 103,188,709 | 0.070 | 0.022  | 0.160 | 7.20E-11 | 0.040 | 0.042  | 0.009 | 2.25E-06 | y |
| TC  | rs11136341 | 8  | 145,043,543 | 0.400 | -0.035 | 0.240 | 8.96E-10 | 0.383 | -0.036 | 0.008 | 3.20E-06 | y |
| HDL | rs881844   | 17 | 37,810,218  | 0.340 | 0.013  | 0.080 | 2.84E-14 | 0.339 | 0.014  | 0.003 | 4.10E-06 | y |
| HDL | rs4731702  | 7  | 130,433,384 | 0.480 | -0.015 | 0.070 | 1.21E-15 | 0.485 | -0.014 | 0.003 | 5.97E-06 | y |
| HDL | rs3136441  | 11 | 46,743,247  | 0.150 | -0.020 | 0.100 | 3.48E-18 | 0.143 | -0.019 | 0.004 | 1.33E-05 | y |
| TC  | rs2290159  | 3  | 12,628,920  | 0.220 | 0.037  | 0.230 | 4.21E-09 | 0.227 | 0.036  | 0.009 | 3.40E-05 | y |
| TC  | rs2277862  | 20 | 34,152,782  | 0.150 | 0.031  | 0.270 | 3.82E-10 | 0.146 | 0.044  | 0.011 | 5.34E-05 | y |
| LDL | rs217386   | 7  | 44,600,695  | 0.430 | 0.030  | 0.190 | 4.25E-11 | 0.461 | 0.028  | 0.007 | 5.80E-05 | y |
| TG  | rs442177   | 4  | 88,030,261  | 0.410 | 0.025  | 0.380 | 8.65E-12 | 0.434 | 0.010  | 0.002 | 6.55E-05 | y |
| TC  | rs1800562  | 6  | 26,093,141  | 0.060 | 0.056  | 0.430 | 2.49E-08 | 0.064 | 0.064  | 0.016 | 7.88E-05 | y |
| TC  | rs1800961  | 20 | 43,042,364  | 0.030 | 0.123  | 0.660 | 5.72E-13 | 0.038 | 0.086  | 0.022 | 1.01E-04 | y |
| TC  | rs2737229  | 8  | 116,648,565 | 0.300 | 0.029  | 0.210 | 2.45E-08 | 0.312 | 0.031  | 0.008 | 1.28E-04 | y |
| HDL | rs12328675 | 2  | 165,540,800 | 0.130 | -0.018 | 0.120 | 2.72E-10 | 0.125 | -0.017 | 0.005 | 1.51E-04 | y |
| LDL | rs1800562  | 6  | 26,093,141  | 0.060 | 0.057  | 0.390 | 6.07E-10 | 0.063 | 0.057  | 0.015 | 1.81E-04 | y |
| HDL | rs605066   | 6  | 139,829,666 | 0.420 | 0.010  | 0.080 | 2.55E-08 | 0.438 | 0.011  | 0.003 | 2.01E-04 | y |
| HDL | rs181362   | 22 | 21,932,068  | 0.200 | 0.012  | 0.090 | 1.11E-08 | 0.213 | 0.013  | 0.004 | 2.15E-04 | y |
| HDL | rs4148008  | 17 | 66,875,294  | 0.320 | 0.011  | 0.080 | 1.79E-10 | 0.318 | 0.012  | 0.003 | 2.25E-04 | y |
| TC  | rs2072183  | 7  | 44,579,180  | 0.250 | -0.052 | 0.290 | 3.22E-11 | 0.233 | -0.035 | 0.010 | 2.39E-04 | y |
| TC  | rs2807834  | 1  | 220,970,593 | 0.320 | 0.036  | 0.220 | 4.90E-13 | 0.321 | 0.029  | 0.008 | 2.61E-04 | y |
| TG  | rs10195252 | 2  | 165,513,091 | 0.400 | 0.022  | 0.380 | 1.63E-10 | 0.432 | 0.009  | 0.003 | 2.62E-04 | y |
| TC  | rs7515577  | 1  | 93,009,438  | 0.210 | 0.031  | 0.240 | 2.78E-08 | 0.233 | 0.032  | 0.009 | 2.64E-04 | y |

|     |            |    |             |       |        |       |          |       |        |       |          |   |
|-----|------------|----|-------------|-------|--------|-------|----------|-------|--------|-------|----------|---|
| HDL | rs2814944  | 6  | 34,552,797  | 0.160 | 0.013  | 0.100 | 3.81E-09 | 0.159 | 0.015  | 0.004 | 3.03E-04 | y |
| TC  | rs7239867  | 18 | 47,164,717  | 0.170 | 0.050  | 0.260 | 2.03E-19 | 0.171 | 0.036  | 0.010 | 3.47E-04 | n |
| TC  | rs492602   | 19 | 49,206,417  | 0.490 | -0.033 | 0.210 | 2.01E-10 | 0.490 | -0.026 | 0.007 | 3.82E-04 | n |
| HDL | rs3741414  | 12 | 57,844,049  | 0.240 | -0.012 | 0.090 | 1.64E-08 | 0.266 | -0.012 | 0.004 | 9.12E-04 | n |
| TC  | rs3764261  | 16 | 56,993,324  | 0.320 | -0.043 | 0.230 | 6.67E-14 | 0.344 | -0.025 | 0.008 | 1.21E-03 | n |
| TC  | rs9488822  | 6  | 116,312,893 | 0.350 | 0.031  | 0.200 | 1.69E-10 | 0.322 | 0.025  | 0.008 | 1.23E-03 | n |
| LDL | rs2807834  | 1  | 220,970,593 | 0.320 | 0.028  | 0.200 | 5.62E-11 | 0.318 | 0.024  | 0.007 | 1.37E-03 | n |
| TG  | rs645040   | 3  | 135,926,622 | 0.220 | 0.024  | 0.450 | 2.52E-08 | 0.200 | 0.009  | 0.003 | 1.47E-03 | n |
| TG  | rs174546   | 11 | 61,569,830  | 0.340 | -0.042 | 0.380 | 5.41E-24 | 0.316 | -0.008 | 0.003 | 1.99E-03 | n |
| TG  | rs1321257  | 1  | 230,305,312 | 0.390 | -0.030 | 0.380 | 2.09E-14 | 0.387 | -0.008 | 0.003 | 2.42E-03 | n |
| TC  | rs11220463 | 11 | 126,248,211 | 0.110 | -0.052 | 0.330 | 2.12E-11 | 0.145 | -0.032 | 0.011 | 2.89E-03 | n |
| HDL | rs7255436  | 19 | 8,433,196   | 0.470 | 0.012  | 0.080 | 3.25E-08 | 0.472 | 0.009  | 0.003 | 3.23E-03 | n |
| TG  | rs4810479  | 20 | 44,545,048  | 0.240 | -0.037 | 0.420 | 4.69E-18 | 0.240 | -0.008 | 0.003 | 3.68E-03 | n |
| LDL | rs11220462 | 11 | 126,243,952 | 0.140 | -0.051 | 0.260 | 1.20E-15 | 0.148 | -0.029 | 0.010 | 4.19E-03 | n |
| TC  | rs2255141  | 10 | 113,933,886 | 0.300 | -0.030 | 0.200 | 2.03E-10 | 0.292 | -0.023 | 0.008 | 5.06E-03 | n |
| HDL | rs4765127  | 12 | 124,460,167 | 0.340 | -0.011 | 0.080 | 2.89E-10 | 0.324 | -0.009 | 0.003 | 5.30E-03 | n |
| LDL | rs11153594 | 6  | 116,354,591 | 0.410 | 0.023  | 0.180 | 2.95E-09 | 0.385 | 0.019  | 0.007 | 6.73E-03 | n |
| TC  | rs2814982  | 6  | 34,546,560  | 0.110 | 0.048  | 0.330 | 4.68E-11 | 0.124 | 0.032  | 0.012 | 6.80E-03 | n |
| TG  | rs12310367 | 12 | 124,486,678 | 0.340 | 0.027  | 0.410 | 1.21E-08 | 0.321 | 0.007  | 0.002 | 7.50E-03 | n |
| TG  | rs1495743  | 8  | 18,273,300  | 0.220 | -0.033 | 0.420 | 4.11E-14 | 0.232 | -0.008 | 0.003 | 7.89E-03 | n |
| TC  | rs1961456  | 8  | 18,255,709  | 0.320 | -0.028 | 0.210 | 1.68E-09 | 0.315 | -0.021 | 0.008 | 8.12E-03 | n |
| HDL | rs17145738 | 7  | 72,982,874  | 0.120 | -0.015 | 0.120 | 1.19E-09 | 0.128 | -0.012 | 0.005 | 9.66E-03 | n |
| LDL | rs3757354  | 6  | 16,127,407  | 0.220 | 0.037  | 0.210 | 1.16E-11 | 0.222 | 0.022  | 0.009 | 9.74E-03 | n |
| HDL | rs7134594  | 12 | 110,000,193 | 0.470 | 0.011  | 0.070 | 6.88E-15 | 0.480 | 0.008  | 0.003 | 1.02E-02 | n |
| TC  | rs2902940  | 20 | 39,091,487  | 0.290 | 0.036  | 0.210 | 6.08E-11 | 0.311 | 0.021  | 0.008 | 1.04E-02 | n |
| TG  | rs7205804  | 16 | 57,004,889  | 0.450 | 0.032  | 0.380 | 1.15E-12 | 0.436 | 0.006  | 0.002 | 1.06E-02 | n |
| TC  | rs1564348  | 6  | 160,578,860 | 0.170 | -0.056 | 0.270 | 9.71E-17 | 0.164 | -0.027 | 0.010 | 1.08E-02 | n |
| HDL | rs2923084  | 11 | 10,388,782  | 0.170 | 0.011  | 0.100 | 4.62E-08 | 0.189 | 0.010  | 0.004 | 1.20E-02 | n |
| TG  | rs9686661  | 5  | 55,861,786  | 0.200 | -0.028 | 0.490 | 1.32E-10 | 0.170 | -0.009 | 0.004 | 1.25E-02 | n |
| TC  | rs10832963 | 11 | 18,664,241  | 0.290 | 0.027  | 0.220 | 2.52E-08 | 0.268 | 0.021  | 0.009 | 1.33E-02 | n |
| LDL | rs2902941  | 20 | 39,091,514  | 0.330 | 0.025  | 0.190 | 1.11E-08 | 0.349 | 0.018  | 0.008 | 1.57E-02 | n |
| HDL | rs12967135 | 18 | 57,849,023  | 0.230 | 0.011  | 0.090 | 6.58E-09 | 0.257 | 0.008  | 0.003 | 2.54E-02 | n |
| LDL | rs1564348  | 6  | 160,578,860 | 0.170 | -0.051 | 0.240 | 1.70E-17 | 0.162 | -0.022 | 0.010 | 2.58E-02 | n |
| TC  | rs7941030  | 11 | 122,522,375 | 0.380 | -0.025 | 0.190 | 1.52E-10 | 0.388 | -0.017 | 0.008 | 2.77E-02 | n |
| TG  | rs2943645  | 2  | 227,099,180 | 0.370 | 0.021  | 0.380 | 2.35E-08 | 0.373 | 0.005  | 0.003 | 3.28E-02 | n |
| HDL | rs2293889  | 8  | 116,599,199 | 0.410 | 0.011  | 0.080 | 5.77E-11 | 0.436 | 0.006  | 0.003 | 3.29E-02 | n |
| HDL | rs4082919  | 17 | 76,377,482  | 0.480 | 0.010  | 0.080 | 4.98E-09 | 0.497 | 0.007  | 0.003 | 3.35E-02 | n |
| TC  | rs581080   | 9  | 15,305,378  | 0.180 | 0.041  | 0.260 | 3.08E-09 | 0.202 | 0.019  | 0.009 | 3.98E-02 | n |
| HDL | rs7115089  | 11 | 122,530,591 | 0.370 | -0.008 | 0.080 | 2.66E-08 | 0.374 | -0.006 | 0.003 | 4.07E-02 | n |
| TC  | rs3757354  | 6  | 16,127,407  | 0.220 | 0.038  | 0.240 | 2.78E-09 | 0.224 | 0.018  | 0.009 | 5.28E-02 | n |
| TG  | rs2929282  | 15 | 44,245,931  | 0.050 | -0.056 | 0.860 | 1.63E-11 | 0.041 | -0.012 | 0.007 | 7.27E-02 | n |
| TG  | rs10761731 | 10 | 65,027,610  | 0.430 | 0.026  | 0.380 | 3.48E-12 | 0.432 | 0.004  | 0.003 | 9.06E-02 | n |
| HDL | rs2652834  | 15 | 63,396,867  | 0.200 | 0.010  | 0.100 | 8.75E-09 | 0.187 | 0.006  | 0.004 | 1.01E-01 | n |
| HDL | rs6450176  | 5  | 53,298,025  | 0.260 | 0.013  | 0.090 | 4.98E-08 | 0.257 | 0.006  | 0.003 | 1.03E-01 | n |
| TG  | rs11649653 | 16 | 30,918,487  | 0.400 | 0.023  | 0.390 | 3.35E-08 | 0.364 | 0.004  | 0.003 | 1.08E-01 | n |
| TG  | rs11613352 | 12 | 57,792,580  | 0.230 | 0.030  | 0.430 | 4.43E-10 | 0.274 | 0.004  | 0.003 | 1.18E-01 | n |
| TC  | rs11065987 | 12 | 112,072,424 | 0.420 | 0.025  | 0.200 | 6.77E-12 | 0.395 | 0.012  | 0.008 | 1.23E-01 | n |
| HDL | rs737337   | 19 | 11,347,493  | 0.080 | 0.017  | 0.140 | 3.10E-09 | 0.083 | 0.008  | 0.006 | 1.34E-01 | n |
| LDL | rs1129555  | 10 | 113,910,721 | 0.290 | -0.028 | 0.200 | 2.14E-09 | 0.289 | -0.011 | 0.008 | 1.63E-01 | n |
| LDL | rs11065987 | 12 | 112,072,424 | 0.420 | 0.025  | 0.180 | 1.51E-09 | 0.392 | 0.010  | 0.007 | 1.74E-01 | n |
| TG  | rs5756931  | 22 | 38,546,033  | 0.400 | 0.017  | 0.380 | 3.82E-08 | 0.371 | 0.003  | 0.003 | 2.19E-01 | n |
| TG  | rs2412710  | 15 | 42,683,787  | 0.020 | -0.077 | 1.490 | 1.87E-08 | 0.024 | -0.010 | 0.009 | 2.61E-01 | n |
| TG  | rs2068888  | 10 | 94,839,642  | 0.470 | 0.025  | 0.380 | 2.38E-08 | 0.458 | 0.003  | 0.002 | 2.73E-01 | n |



---

|     |            |    |            |       |        |       |          |       |        |       |          |   |
|-----|------------|----|------------|-------|--------|-------|----------|-------|--------|-------|----------|---|
| LDL | rs7225700  | 17 | 45,391,804 | 0.350 | 0.023  | 0.180 | 3.92E-09 | 0.396 | 0.005  | 0.007 | 4.91E-01 | n |
| TG  | rs11776767 | 8  | 10,683,929 | 0.370 | -0.022 | 0.390 | 1.30E-08 | 0.352 | -0.002 | 0.003 | 5.16E-01 | n |
| HDL | rs7134375  | 12 | 20,473,758 | 0.420 | -0.010 | 0.080 | 3.84E-08 | 0.430 | 0.002  | 0.003 | 6.45E-01 | n |
| LDL | rs2332328  | 14 | 24,883,058 | 0.480 | -0.030 | 0.190 | 4.41E-11 | 0.480 | 0.001  | 0.007 | 8.45E-01 | n |

---

**Supplementary Table 7. Replication of the loci identified by Willer *et al.*<sup>[2]</sup> in the meta-analysis of the discovery cohorts.**

$\beta$  is the effect size of the effect allele per mmol per Liter

| Trait | SNP        | Chr | Position    | Willer <i>et al.</i> (2013) |         |               |          | This study |         |               |          | replicated? |
|-------|------------|-----|-------------|-----------------------------|---------|---------------|----------|------------|---------|---------------|----------|-------------|
|       |            |     |             | MAF                         | $\beta$ | SE $_{\beta}$ | p-value  | MAF        | $\beta$ | SE $_{\beta}$ | p-value  |             |
| HDL   | rs11246602 | 11  | 51,512,090  | 0.150                       | 0.034   | -             | 2.00E-10 | 0.152      | 0.023   | 0.004         | 5.84E-08 | y           |
| HDL   | rs12748152 | 1   | 27,138,393  | 0.090                       | -0.051  | -             | 1.00E-15 | 0.081      | -0.028  | 0.005         | 1.96E-07 | y           |
| LDL   | rs1801689  | 17  | 64,210,580  | 0.040                       | 0.103   | -             | 1.00E-11 | 0.039      | 0.118   | 0.025         | 1.56E-06 | y           |
| HDL   | rs499974   | 11  | 75,455,021  | 0.190                       | -0.026  | -             | 1.00E-08 | 0.177      | -0.018  | 0.004         | 2.80E-06 | y           |
| LDL   | rs1250229  | 2   | 216,304,384 | 0.270                       | -0.024  | -             | 3.00E-08 | 0.283      | -0.031  | 0.008         | 8.18E-05 | y           |
| LDL   | rs10490626 | 2   | 118,835,841 | 0.080                       | -0.051  | -             | 2.00E-12 | 0.067      | -0.057  | 0.015         | 1.21E-04 | y           |
| TC    | rs4883201  | 12  | 9,082,581   | 0.120                       | -0.035  | -             | 2.00E-09 | 0.101      | -0.048  | 0.013         | 1.26E-04 | y           |
| LDL   | rs2710642  | 2   | 63,149,557  | 0.350                       | -0.024  | -             | 6.00E-09 | 0.335      | -0.028  | 0.007         | 1.60E-04 | y           |
| TC    | rs10102164 | 8   | 55,421,614  | 0.210                       | 0.030   | -             | 5.00E-11 | 0.207      | 0.034   | 0.009         | 1.89E-04 | y           |
| HDL   | rs1047891  | 2   | 211,540,507 | 0.330                       | -0.027  | -             | 9.00E-10 | 0.310      | -0.013  | 0.004         | 2.28E-04 | y           |
| TG    | rs4722551  | 7   | 25,991,826  | 0.200                       | 0.029   | -             | 9.00E-11 | 0.116      | 0.015   | 0.004         | 2.40E-04 | y           |
| TC    | rs6831256  | 4   | 3,473,139   | 0.420                       | -0.022  | -             | 1.00E-10 | 0.415      | -0.027  | 0.008         | 3.07E-04 | y           |
| HDL   | rs4142995  | 7   | 17,919,258  | 0.380                       | -0.026  | -             | 9.00E-12 | 0.388      | -0.011  | 0.003         | 3.20E-04 | y           |
| LDL   | rs10102164 | 8   | 55,421,614  | 0.210                       | 0.032   | -             | 4.00E-11 | 0.205      | 0.031   | 0.009         | 3.42E-04 | y           |
| HDL   | rs4650994  | 1   | 178,515,312 | 0.490                       | 0.021   | -             | 7.00E-09 | 0.472      | 0.010   | 0.003         | 3.58E-04 | y           |
| TC    | rs1077514  | 1   | 23,766,233  | 0.150                       | -0.030  | -             | 6.00E-09 | 0.161      | -0.035  | 0.010         | 4.62E-04 | y           |
| LDL   | rs314253   | 17  | 7,091,650   | 0.370                       | -0.024  | -             | 3.00E-10 | 0.398      | -0.027  | 0.008         | 4.93E-04 | y           |
| LDL   | rs12748152 | 1   | 27,138,393  | 0.090                       | 0.050   | -             | 3.00E-12 | 0.086      | 0.043   | 0.013         | 5.54E-04 | y           |
| HDL   | rs2290547  | 3   | 47,061,183  | 0.200                       | -0.030  | -             | 4.00E-09 | 0.165      | -0.015  | 0.005         | 8.67E-04 | n           |
| HDL   | rs17695224 | 19  | 52,324,216  | 0.260                       | -0.029  | -             | 2.00E-13 | 0.264      | -0.011  | 0.003         | 9.45E-04 | n           |
| HDL   | rs12145743 | 1   | 156,700,651 | 0.340                       | 0.020   | -             | 2.00E-08 | 0.365      | 0.011   | 0.003         | 9.68E-04 | n           |
| TC    | rs314253   | 17  | 7,091,650   | 0.370                       | -0.023  | -             | 3.00E-10 | 0.398      | -0.026  | 0.008         | 1.05E-03 | n           |
| LDL   | rs17404153 | 3   | 132,163,200 | 0.140                       | -0.034  | -             | 2.00E-09 | 0.113      | -0.037  | 0.012         | 1.14E-03 | n           |
| HDL   | rs13326165 | 3   | 52,532,118  | 0.210                       | 0.029   | -             | 9.00E-11 | 0.198      | 0.013   | 0.004         | 1.49E-03 | n           |
| TC    | rs10490626 | 2   | 118,835,841 | 0.080                       | 0.042   | -             | 6.00E-09 | 0.067      | 0.048   | 0.016         | 1.90E-03 | n           |
| TC    | rs970548   | 10  | 46,013,277  | 0.260                       | -0.026  | -             | 8.00E-09 | 0.272      | -0.026  | 0.009         | 1.94E-03 | n           |
| TC    | rs9376090  | 6   | 135,411,228 | 0.280                       | -0.025  | -             | 3.00E-09 | 0.273      | -0.025  | 0.008         | 2.24E-03 | n           |
| TC    | rs7640978  | 3   | 32,533,010  | 0.090                       | -0.038  | -             | 1.00E-08 | 0.078      | -0.042  | 0.014         | 2.33E-03 | n           |
| TC    | rs10904908 | 10  | 17,260,290  | 0.430                       | 0.025   | -             | 3.00E-11 | 0.434      | 0.022   | 0.007         | 2.78E-03 | n           |
| LDL   | rs7640978  | 3   | 32,533,010  | 0.090                       | -0.039  | -             | 1.00E-08 | 0.078      | -0.039  | 0.013         | 2.79E-03 | n           |
| TC    | rs4530754  | 5   | 122,855,416 | 0.460                       | -0.023  | -             | 2.00E-09 | 0.469      | -0.022  | 0.007         | 2.80E-03 | n           |
| TC    | rs11694172 | 2   | 203,532,304 | 0.250                       | 0.028   | -             | 2.00E-09 | 0.261      | 0.025   | 0.008         | 2.93E-03 | n           |
| TG    | rs7248104  | 19  | 7,224,431   | 0.420                       | -0.022  | -             | 5.00E-10 | 0.399      | -0.007  | 0.002         | 3.65E-03 | n           |
| TG    | rs12748152 | 1   | 27,138,393  | 0.090                       | 0.037   | -             | 1.00E-09 | 0.080      | 0.014   | 0.005         | 4.18E-03 | n           |
| HDL   | rs998584   | 6   | 43,757,896  | 0.490                       | -0.026  | -             | 2.00E-11 | 0.462      | -0.009  | 0.003         | 4.30E-03 | n           |
| LDL   | rs6831256  | 4   | 3,473,139   | 0.420                       | 0.025   | -             | 2.00E-08 | 0.413      | 0.020   | 0.007         | 4.33E-03 | n           |
| HDL   | rs731839   | 19  | 33,899,065  | 0.350                       | -0.022  | -             | 3.00E-09 | 0.329      | -0.009  | 0.003         | 4.77E-03 | n           |
| HDL   | rs4983559  | 14  | 105,277,209 | 0.400                       | 0.020   | -             | 1.00E-07 | 0.397      | 0.011   | 0.004         | 5.01E-03 | n           |
| HDL   | rs1121980  | 16  | 53,809,247  | 0.430                       | -0.020  | -             | 7.00E-09 | 0.427      | -0.009  | 0.003         | 6.03E-03 | n           |
| LDL   | rs4722551  | 7   | 25,991,826  | 0.200                       | 0.039   | -             | 4.00E-14 | 0.152      | 0.029   | 0.011         | 6.53E-03 | n           |
| TC    | rs4722551  | 7   | 25,991,826  | 0.200                       | 0.023   | -             | 7.00E-09 | 0.154      | 0.031   | 0.011         | 6.96E-03 | n           |
| LDL   | rs4530754  | 5   | 122,855,416 | 0.460                       | -0.028  | -             | 4.00E-12 | 0.467      | -0.019  | 0.007         | 7.65E-03 | n           |
| LDL   | rs3780181  | 9   | 2,640,759   | 0.080                       | -0.044  | -             | 2.00E-09 | 0.068      | -0.038  | 0.015         | 9.30E-03 | n           |
| LDL   | rs4942486  | 13  | 32,953,388  | 0.480                       | 0.024   | -             | 2.00E-11 | 0.495      | 0.018   | 0.007         | 9.94E-03 | n           |
| TC    | rs3780181  | 9   | 2,640,759   | 0.080                       | -0.044  | -             | 7.00E-10 | 0.069      | -0.040  | 0.015         | 9.97E-03 | n           |

|     |            |    |             |       |        |   |          |       |        |       |          |   |
|-----|------------|----|-------------|-------|--------|---|----------|-------|--------|-------|----------|---|
| HDL | rs3822072  | 4  | 89,741,269  | 0.460 | -0.025 | - | 4.00E-12 | 0.438 | -0.008 | 0.003 | 1.04E-02 | n |
| TC  | rs13315871 | 3  | 58,381,287  | 0.100 | -0.036 | - | 4.00E-08 | 0.094 | -0.032 | 0.013 | 1.26E-02 | n |
| LDL | rs2328223  | 20 | 17,845,921  | 0.210 | 0.030  | - | 6.00E-09 | 0.180 | 0.026  | 0.011 | 1.81E-02 | n |
| TG  | rs998584   | 6  | 43,757,896  | 0.490 | 0.029  | - | 3.00E-15 | 0.464 | 0.006  | 0.002 | 1.90E-02 | n |
| HDL | rs12801636 | 11 | 65,391,317  | 0.230 | 0.024  | - | 3.00E-08 | 0.227 | 0.009  | 0.004 | 2.02E-02 | n |
| HDL | rs702485   | 7  | 6,449,272   | 0.450 | 0.024  | - | 7.00E-12 | 0.438 | 0.007  | 0.003 | 2.18E-02 | n |
| TG  | rs1936800  | 6  | 127,436,064 | 0.490 | -0.020 | - | 3.00E-08 | 0.492 | -0.005 | 0.002 | 2.35E-02 | n |
| TG  | rs6831256  | 4  | 3,473,139   | 0.420 | 0.026  | - | 2.00E-12 | 0.401 | 0.005  | 0.002 | 2.52E-02 | n |
| HDL | rs17173637 | 7  | 150,529,449 | 0.120 | -0.036 | - | 2.00E-08 | 0.105 | -0.011 | 0.005 | 2.73E-02 | n |
| TG  | rs1832007  | 10 | 5,254,847   | 0.180 | -0.033 | - | 2.00E-12 | 0.155 | -0.007 | 0.003 | 3.28E-02 | n |
| HDL | rs2013208  | 3  | 50,129,399  | 0.500 | 0.025  | - | 9.00E-12 | 0.494 | 0.006  | 0.003 | 3.29E-02 | n |
| LDL | rs11563251 | 2  | 234,679,384 | 0.120 | 0.034  | - | 5.00E-08 | 0.102 | 0.026  | 0.012 | 3.49E-02 | n |
| HDL | rs970548   | 10 | 46,013,277  | 0.260 | 0.026  | - | 2.00E-10 | 0.260 | 0.007  | 0.004 | 3.79E-02 | n |
| TC  | rs138777   | 22 | 35,711,098  | 0.360 | 0.021  | - | 5.00E-08 | 0.372 | 0.016  | 0.008 | 4.30E-02 | n |
| TC  | rs2758886  | 6  | 39,250,837  | 0.300 | 0.023  | - | 3.00E-08 | 0.304 | 0.016  | 0.008 | 5.14E-02 | n |
| TC  | rs2287623  | 2  | 169,830,155 | 0.410 | 0.027  | - | 4.00E-12 | 0.399 | 0.015  | 0.008 | 5.23E-02 | n |
| TC  | rs2030746  | 2  | 121,309,488 | 0.400 | 0.020  | - | 4.00E-08 | 0.411 | 0.014  | 0.008 | 6.06E-02 | n |
| TG  | rs8077889  | 17 | 41,878,166  | 0.220 | 0.025  | - | 1.00E-08 | 0.195 | 0.006  | 0.003 | 6.11E-02 | n |
| HDL | rs2606736  | 3  | 11,400,249  | 0.390 | 0.025  | - | 5.00E-08 | 0.361 | 0.006  | 0.003 | 6.90E-02 | n |
| HDL | rs6805251  | 3  | 119,560,606 | 0.390 | 0.020  | - | 1.00E-08 | 0.368 | 0.006  | 0.003 | 7.09E-02 | n |
| TG  | rs1121980  | 16 | 53,809,247  | 0.430 | -0.021 | - | 3.00E-08 | 0.424 | -0.005 | 0.003 | 7.36E-02 | n |
| HDL | rs10019888 | 4  | 26,062,990  | 0.180 | -0.027 | - | 5.00E-08 | 0.154 | -0.007 | 0.004 | 7.49E-02 | n |
| TC  | rs11563251 | 2  | 234,679,384 | 0.120 | 0.037  | - | 1.00E-09 | 0.102 | 0.022  | 0.013 | 8.90E-02 | n |
| LDL | rs364585   | 20 | 12,962,718  | 0.380 | -0.025 | - | 4.00E-10 | 0.403 | -0.012 | 0.007 | 9.57E-02 | n |
| LDL | rs2030746  | 2  | 121,309,488 | 0.400 | 0.021  | - | 9.00E-09 | 0.409 | 0.012  | 0.007 | 1.03E-01 | n |
| TC  | rs4253772  | 22 | 46,627,603  | 0.110 | 0.032  | - | 1.00E-08 | 0.105 | 0.019  | 0.013 | 1.31E-01 | n |
| LDL | rs267733   | 1  | 150,958,836 | 0.160 | -0.033 | - | 5.00E-09 | 0.173 | -0.014 | 0.010 | 1.34E-01 | n |
| HDL | rs1936800  | 6  | 127,436,064 | 0.490 | 0.020  | - | 3.00E-10 | 0.485 | 0.004  | 0.003 | 1.35E-01 | n |
| TC  | rs1997243  | 7  | 1,083,777   | 0.160 | 0.033  | - | 3.00E-10 | 0.186 | 0.012  | 0.010 | 2.25E-01 | n |
| LDL | rs4253772  | 22 | 46,627,603  | 0.110 | -0.031 | - | 3.00E-08 | 0.103 | -0.013 | 0.012 | 2.69E-01 | n |
| HDL | rs2602836  | 4  | 100,014,805 | 0.440 | 0.019  | - | 5.00E-08 | 0.432 | 0.003  | 0.003 | 3.10E-01 | n |
| TG  | rs3198697  | 16 | 15,129,940  | 0.430 | -0.020 | - | 2.00E-08 | 0.415 | -0.003 | 0.003 | 3.34E-01 | n |
| TG  | rs38855    | 7  | 116,358,044 | 0.470 | -0.019 | - | 2.00E-08 | 0.467 | -0.002 | 0.002 | 4.06E-01 | n |
| TG  | rs731839   | 19 | 33,899,065  | 0.350 | 0.022  | - | 3.00E-09 | 0.319 | 0.002  | 0.003 | 4.32E-01 | n |
| HDL | rs4917014  | 7  | 50,305,863  | 0.320 | 0.022  | - | 1.00E-08 | 0.333 | 0.002  | 0.003 | 5.92E-01 | n |
| LDL | rs5763662  | 22 | 30,378,703  | 0.040 | 0.077  | - | 1.00E-08 | 0.017 | 0.014  | 0.028 | 6.21E-01 | n |
| TC  | rs11603023 | 11 | 118,486,067 | 0.420 | 0.022  | - | 1.00E-08 | 0.421 | 0.002  | 0.008 | 7.85E-01 | n |
| HDL | rs17404153 | 3  | 132,163,200 | 0.140 | 0.028  | - | 5.00E-09 | 0.109 | 0.000  | 0.005 | 9.27E-01 | n |

**Supplementary Table 8. Potential novel variants associated with HDL, LDL, TC and TG.**

EA: effect allele. MAF, MAF<sub>GoNL</sub> and MAF<sub>1kG</sub>: the minor allele frequency of the effect allele in the discovery cohorts, in the GoNL reference panel and in the 1kG reference panel. *N*: estimated effective sample size, determined by GCTA.

| Trait | SNP         | Chr | Position   | EA | MAF   | MAF <sub>GoNL</sub> | MAF <sub>1kG</sub> | <i>N</i> | After METAL analysis   |                              |                                  | After GCTA analysis            |                              |                                  |        |       |          |
|-------|-------------|-----|------------|----|-------|---------------------|--------------------|----------|------------------------|------------------------------|----------------------------------|--------------------------------|------------------------------|----------------------------------|--------|-------|----------|
|       |             |     |            |    |       |                     |                    |          | $\beta$                | SE $_{\beta}$                | <i>p</i> -value                  | Before exclusion of known loci |                              | After exclusion of known loci    |        |       |          |
|       |             |     |            |    |       |                     |                    |          | $\beta_{\text{joint}}$ | SE $_{\beta_{\text{joint}}}$ | <i>p</i> -value <sub>joint</sub> | $\beta_{\text{joint}}$         | SE $_{\beta_{\text{joint}}}$ | <i>p</i> -value <sub>joint</sub> |        |       |          |
| HDL   | rs4752801   | 11  | 47,907,641 | G  | 0.355 | 0.347               | 0.338              | 35600.6  | -0.023                 | 0.003                        | 1.62E-12                         | -0.040                         | 0.004                        | 1.74E-21                         | -0.023 | 0.003 | 1.35E-12 |
| HDL   | rs149580368 | 17  | 41,874,745 | A  | 0.036 | 0.029               | 0.015              | 25123.6  | -0.075                 | 0.010                        | 4.23E-14                         | -0.078                         | 0.010                        | 5.72E-15                         | -0.075 | 0.010 | 5.41E-14 |
| LDL   | rs77542162  | 17  | 67,081,278 | G  | 0.034 | 0.030               | 0.008              | 26862.2  | 0.135                  | 0.023                        | 6.67E-09                         | 0.135                          | 0.023                        | 6.71E-09                         | 0.135  | 0.023 | 6.71E-09 |
| TC    | rs77542162  | 17  | 67,081,278 | G  | 0.034 | 0.030               | 0.008              | 26969.4  | 0.140                  | 0.025                        | 1.29E-08                         | 0.140                          | 0.025                        | 1.34E-08                         | 0.140  | 0.025 | 1.34E-08 |
| TC    | rs144984216 | 19  | 20,479,901 | T  | 0.046 | 0.028               | 0.011              | 21622.9  | -0.140                 | 0.024                        | 7.88E-09                         | -0.081                         | 0.023                        | 4.65E-04                         | -0.140 | 0.024 | 8.41E-09 |
| TG    | rs117162033 | 19  | 8,627,569  | T  | 0.016 | 0.007               | 0.007              | 5940.1   | -0.143                 | 0.025                        | 8.02E-09                         | -0.143                         | 0.025                        | 8.31E-09                         | -0.143 | 0.025 | 8.31E-09 |

**Supplementary Table 9. The LD between the novel variants and the known loci for the same trait located on the same chromosome.**

| Trait | Novel variant |     |            | Known loci  |     |             | Rsq       |
|-------|---------------|-----|------------|-------------|-----|-------------|-----------|
|       | SNP           | Chr | Position   | SNP         | Chr | Position    |           |
| HDL   | rs4752801     | 11  | 47,907,641 | rs2923084   | 11  | 10,388,782  | 0         |
|       |               |     |            | rs3136441   | 11  | 46,743,247  | 0.015     |
|       |               |     |            | rs11246602  | 11  | 51,512,090  | 0.071     |
|       |               |     |            | rs174601    | 11  | 61,623,140  | 0.007     |
|       |               |     |            | rs12801636  | 11  | 65,391,317  | 0         |
|       |               |     |            | rs499974    | 11  | 75,455,021  | 0.001     |
|       |               |     |            | rs964184    | 11  | 116,648,917 | 0.006     |
|       |               |     |            | rs7115089   | 11  | 122,530,591 | 0.002     |
|       |               |     |            | rs881844    | 17  | 37,810,218  | 0.018     |
|       |               |     |            | rs149580368 | 17  | 41,874,745  | rs4148008 |
| LDL   | rs77542162    | 17  | 67,081,278 | rs4082919   | 17  | 76,377,482  | 0.004     |
|       |               |     |            | rs314253    | 17  | 7,091,650   | 0         |
|       |               |     |            | rs7225700   | 17  | 45,391,804  | 0         |
|       |               |     |            | rs1801689   | 17  | 64,210,580  | 0.001     |
| TC    | rs77542162    | 17  | 67,081,278 | rs314253    | 17  | 7,091,650   | 0         |
|       |               |     |            | rs7206971   | 17  | 45,425,115  | 0         |
|       |               |     |            | rs6511720   | 19  | 11,202,306  | 0.001     |
|       |               |     |            | rs10401969  | 19  | 19,407,718  | 0.139     |
|       |               |     |            | rs144984216 | 19  | 20,479,901  | rs4420638 |
| TG    | rs117162033   | 19  | 8,627,569  | rs492602    | 19  | 49,206,417  | 0         |
|       |               |     |            | rs7248104   | 19  | 7,224,431   | 0.001     |
|       |               |     |            | rs10401969  | 19  | 19,407,718  | 0.003     |
|       |               |     |            | rs731839    | 19  | 33,899,065  | 0.004     |
|       |               |     |            | rs439401    | 19  | 45,414,451  | 0         |

**Supplementary Table 10. Conditional analysis within the discovery cohorts.**

Direction: ERF, LLS, NTR-NESDA, PREVEND, PROSPER, RS-I, RS-II and RS-III. EA: effect allele. NEA: non effect allele.

| Trait | SNP         | Chr | Position   | EA | NEA | Unadjusted analysis |              |            |           |         | Conditional analysis |            |           |  |
|-------|-------------|-----|------------|----|-----|---------------------|--------------|------------|-----------|---------|----------------------|------------|-----------|--|
|       |             |     |            |    |     | $\beta$             | $SE_{\beta}$ | $p$ -value | Direction | $\beta$ | $SE_{\beta}$         | $p$ -value | Direction |  |
| HDL   | rs4752801   | 11  | 47,907,641 | G  | A   | -0.016              | 0.003        | 1.88E-06   | - - - - - | -0.018  | 0.004                | 8.66E-06   | - - - - - |  |
| HDL   | rs149580368 | 17  | 41,874,745 | A  | C   | -0.063              | 0.011        | 3.72E-08   | - - - - - | -0.067  | 0.011                | 2.57E-09   | - + - - - |  |
| LDL   | rs77542162  | 17  | 67,081,278 | G  | A   | 0.141               | 0.035        | 6.29E-05   | + + + + + | 0.118   | 0.031                | 1.75E-04   | + + + + + |  |
| TC    | rs77542162  | 17  | 67,081,278 | G  | A   | 0.138               | 0.034        | 4.75E-05   | + + + + + | 0.108   | 0.033                | 1.16E-03   | + + - + + |  |
| TC    | rs144984216 | 19  | 20,479,901 | T  | C   | -0.131              | 0.034        | 9.78E-05   | + - - - - | -0.084  | 0.042                | 4.27E-02   | + - - - - |  |
| TG    | rs117162033 | 19  | 8,627,569  | T  | C   | -0.109              | 0.025        | 1.46E-05   | - - - - - | -0.117  | 0.025                | 2.68E-06   | - - + - - |  |

**Supplementary Table 11. Results of the replication of the potential novel variants.**

Direction: CHS, CROATIA-Korcula, CROATIA-Split, CROATIA-Vis, FamHS, FHS, GS, MESA Whites, ORCADES, PROSPER-Ireland, PROSPER-Schotland. EA: effect allele. NEA: non effect allele. MAF: minor allele frequency.  $MAF_{min/max}$ : the minimum and maximum MAF in the separate cohorts.

| Trait | SNP         | Chr | Position   | EA | NEA | MAF   | $SE_{MAF}$ | $MAF_{min}$ | $MAF_{max}$ | $\beta$ | $SE_{\beta}$ | $p$ -value | Direction             |
|-------|-------------|-----|------------|----|-----|-------|------------|-------------|-------------|---------|--------------|------------|-----------------------|
| HDL   | rs4752801   | 11  | 47,907,641 | G  | A   | 0.362 | 0.020      | 0.390       | 0.313       | -0.012  | 0.003        | 5.63E-05   | - - - - -             |
| HDL   | rs149580368 | 17  | 41,874,745 | A  | C   | 0.023 | 0.004      | 0.015       | 0.032       | -0.079  | 0.014        | 5.90E-09   | ? - + - - ? - - - -   |
| LDL   | rs77542162  | 17  | 67,081,278 | G  | A   | 0.026 | 0.006      | 0.033       | 0.014       | 0.125   | 0.031        | 4.35E-05   | + ? ? ? + + ? + - + + |
| TC    | rs77542162  | 17  | 67,081,278 | G  | A   | 0.027 | 0.006      | 0.033       | 0.014       | 0.095   | 0.028        | 6.61E-04   | + ? ? ? + + + + - + + |
| TC    | rs144984216 | 19  | 20,479,901 | T  | C   | 0.025 | 0.005      | 0.016       | 0.035       | -0.056  | 0.036        | 1.22E-01   | ? - - - ? + + + - - - |
| TG    | rs117162033 | 19  | 8,627,569  | T  | C   | 0.021 | 0.004      | 0.012       | 0.026       | -0.133  | 0.030        | 7.98E-06   | ? - ? + ? ? ? - - - - |

**Supplementary Table 12. Baseline characteristics for replication cohorts.**

| Cohort              | HDL         |                      |                                          | LDL         |                      |                                          |
|---------------------|-------------|----------------------|------------------------------------------|-------------|----------------------|------------------------------------------|
|                     | N (% male)  | Mean age (SD), years | Mean HDL-C (SD), in mmol L <sup>-1</sup> | N (% male)  | Mean age (SD), years | Mean LDL-C (SD), in mmol L <sup>-1</sup> |
| CHS                 | 3116 (39.7) | 72.40 (5.4)          | 1.43 (0.4)                               | 3079 (39.7) | 72.41 (5.4)          | 3.36 (0.9)                               |
| Croatia Korcula     | 858 (35.8)  | 55.89 (14.0)         | 1.46 (0.3)                               | 855 (35.7)  | 55.90 (14.0)         | 3.85 (1.0)                               |
| Croatia Split       | 489 (41.9)  | 49.03 (14.6)         | 1.38 (0.3)                               | 477 (40.5)  | 49.10 (14.7)         | 3.82 (1.1)                               |
| Croatia Vis         | 919 (42.7)  | 55.93 (15.6)         | 1.11 (0.2)                               | 917 (42.7)  | 55.94 (15.6)         | 3.23 (0.9)                               |
| FamHS               | 3438 (46.3) | 51.09 (13.7)         | 1.29 (0.4)                               | 3436 (46.3) | 51.09 (13.7)         | 3.22 (0.9)                               |
| FHS                 | 7030 (46.3) | 37.48 (9.6)          | 1.37 (0.4)                               | 6964 (45.9) | 37.43 (9.6)          | 3.06 (0.9)                               |
| Generation Scotland | 7067 (39.7) | 50.48 (13.2)         | 1.49 (0.4)                               | -           | -                    | -                                        |
| MESA Whites         | 2491 (48.3) | 62.82 (10.2)         | 1.35 (0.4)                               | 2471 (48.0) | 62.87 (10.2)         | 3.23 (0.8)                               |
| ORCADES             | 1736 (38.2) | 51.69 (15.1)         | 1.50 (0.4)                               | 1736 (38.2) | 51.69 (15.1)         | 3.47 (0.9)                               |
| PROSPER-Scottish    | 2303 (49.1) | 75.31 (3.4)          | 1.29 (0.4)                               | 2303 (49.1) | 75.31 (3.4)          | 3.82 (0.8)                               |
| PROSPER-Irish       | 1980 (45.0) | 75.45 (3.3)          | 1.29 (0.4)                               | 1980 (45.0) | 75.45 (3.3)          | 3.70 (0.8)                               |

| Cohort              | TC          |                      |                                       | TG          |                      |                                       |
|---------------------|-------------|----------------------|---------------------------------------|-------------|----------------------|---------------------------------------|
|                     | N (% male)  | Mean age (SD), years | Mean TC (SD), in mmol L <sup>-1</sup> | N (% male)  | Mean age (SD), years | Mean TG (SD), in mmol L <sup>-1</sup> |
| CHS                 | 3119 (39.7) | 72.40 (5.4)          | 5.49 (1.0)                            | 3119 (39.7) | 72.40 (5.4)          | 1.57 (0.8)                            |
| Croatia Korcula     | 861 (35.9)  | 55.87 (14.0)         | 5.98 (1.2)                            | 857 (35.7)  | 55.91 (14.0)         | 1.43 (0.8)                            |
| Croatia Split       | 489 (41.9)  | 49.03 (14.6)         | 5.88 (1.3)                            | 486 (41.6)  | 49.03 (14.6)         | 1.49 (0.9)                            |
| Croatia Vis         | 921 (42.8)  | 55.98 (15.6)         | 5.10 (0.9)                            | 918 (42.7)  | 55.91 (15.6)         | 1.68 (0.9)                            |
| FamHS               | 3435 (46.3) | 51.09 (13.7)         | 5.27 (1.0)                            | 3368 (46.3) | 51.09 (13.7)         | 1.56 (0.8)                            |
| FHS                 | 7047 (46.3) | 37.47 (9.6)          | 4.94 (0.9)                            | 7045 (46.3) | 37.47 (9.6)          | 1.13 (0.9)                            |
| Generation Scotland | 7078 (39.8) | 50.47 (13.2)         | 5.33 (1.0)                            | -           | -                    | -                                     |
| MESA Whites         | 2498 (48.1) | 62.84 (10.2)         | 5.26 (0.9)                            | 2502 (48.1) | 62.84 (10.2)         | 1.78 (0.5)                            |
| ORCADES             | 1736 (38.2) | 51.69 (15.1)         | 5.47 (1.1)                            | 1736 (38.2) | 51.69 (15.1)         | 1.09 (0.6)                            |
| PROSPER-Scottish    | 2303 (49.1) | 75.31 (3.4)          | 5.70 (0.9)                            | 2303 (49.1) | 75.31 (3.4)          | 1.58 (0.7)                            |
| PROSPER-Irish       | 1980 (45.0) | 75.45 (3.3)          | 5.62 (0.9)                            | 1980 (45.0) | 75.45 (3.3)          | 1.54 (0.7)                            |

| Cohort          | Country of origin  |
|-----------------|--------------------|
| CHS             | European Americans |
| Croatia Korcula | Croatia            |
| Croatia Split   | Croatia            |
| Croatia Vis     | Croatia            |
| FamHS           | European Americans |
| FHS             | European Americans |

|                     |                    |
|---------------------|--------------------|
| Generation Scotland | Scotland           |
| MESA Whites         | European Americans |
| ORCADES             | United Kingdom     |
| PROSPER-Scottish    | Scotland           |
| PROSPER-Irish       | Ireland            |

---

**Supplementary Table 13. The genomic control factor ( $\lambda$ ) per trait per cohort after removing the SNPs with  $R_{sq} < 0.3$ ,  $R_{sq} > 1.1$  and  $expMAC < 10$ .**

| Cohort    | HDL        |           | LDL        |           | TC         |           | TG         |           |
|-----------|------------|-----------|------------|-----------|------------|-----------|------------|-----------|
|           | # SNPs     | $\lambda$ | # SNPs     | $\lambda$ | # SNPs     | $\lambda$ | # SNPs     | $\lambda$ |
| ERF       | 7,734,540  | 1.11      | 7,730,618  | 1.15      | 7,734,967  | 1.16      | 7,724,667  | 1.13      |
| Lifelines | 12,040,098 | 1.09      | 12,040,548 | 1.1       | 12,040,549 | 1.09      | 12,026,821 | 1.08      |
| LLS       | 9,978,402  | 1         | 9,955,359  | 0.99      | 10,002,471 | 0.99      | -          | -         |
| NTR NESDA | 7,716,345  | 1.05      | 7,715,940  | 1.05      | 7,716,424  | 1.04      | 7,716,527  | 1.01      |
| PREVEND   | 11,160,676 | 1.03      | 11,130,565 | 1.02      | 11,184,087 | 1.01      | 11,161,890 | 1.02      |
| PROSPER   | 8,790,308  | 1.01      | 8,786,035  | 1         | 8,787,472  | 1         | 8,786,962  | 1.01      |
| RS-I      | 10,542,999 | 1.03      | 10,478,841 | 1.02      | 10,572,917 | 1.01      | 10,537,253 | 1.02      |
| RS-II     | 9,718,603  | 1.01      | 9,683,704  | 1         | 9,717,829  | 1.01      | 9,691,451  | 1.01      |
| RS-III    | 10,153,993 | 1.01      | 10,134,268 | 1.03      | 10,155,983 | 1.03      | 10,137,373 | 1.02      |



**Supplementary Table 14. The number of SNPs after meta-analysis.**

| <b>Number of SNPs</b>                                              | <b>HDL</b> | <b>LDL</b> | <b>TC</b>  | <b>TG</b>  |
|--------------------------------------------------------------------|------------|------------|------------|------------|
| after METAL analysis                                               | 13,001,835 | 12,986,317 | 13,017,734 | 12,879,667 |
| after METAL analysis in > 6 cohorts                                | 8,736,495  | 8,725,604  | 8,734,336  | 8,022,728  |
| after METAL analysis in > 6 cohorts and labelled accessible genome | 8,376,524  | 8,365,919  | 8,374,408  | 7,697,441  |

## **Supplementary Note 1: The Genome of the Netherlands Consortium and the CHARGE lipids Working Groups.**

### ***The Genome of the Netherlands Consortium.***

Analysis group: Morris A. Swertz<sup>6,7</sup> (Co-Chair), Laurent C. Francioli<sup>1</sup>, Freerk van Dijk<sup>6,7</sup>, Androniki Menelaou<sup>1</sup>, Pieter B.T. Neerincx<sup>6,7</sup>, Sara L. Pulit<sup>1</sup>, Patrick Deelen<sup>6,7</sup>, Clara C. Elbers<sup>1</sup>, Pier Francesco Palamara<sup>2</sup>, Itsik Pe'er<sup>2,8</sup>, Abdel Abdellaoui<sup>9</sup>, Wigard P. Kloosterman<sup>1</sup>, Mannis van Oven<sup>10</sup>, Martijn Vermaat<sup>11</sup>, Mingkun Li<sup>12</sup>, Jeroen F.J. Laros<sup>11</sup>, Mark Stoneking<sup>12</sup>, Peter de Knijff<sup>13</sup>, Manfred Kayser<sup>10</sup>, Jan H. Veldink<sup>14</sup>, Leonard H. van den Berg<sup>14</sup>, Heorhiy Byelas<sup>6,7</sup>, Johan T. den Dunnen<sup>11</sup>, Martijn Dijkstra<sup>6,7</sup>, Najaf Amin<sup>15</sup>, K. Joeri van der Velde<sup>6,7</sup>, Jouke Jan Hottenga<sup>9</sup>, Jessica van Setten<sup>1</sup>, Elisabeth M. van Leeuwen<sup>15</sup>, Alexandros Kanterakis<sup>6,7</sup>, Mathijs Kattenberg<sup>9</sup>, Lennart C. Karssen<sup>15</sup>, Barbera D.C. van Schaik<sup>16</sup>, Jan Bot<sup>17</sup>, Isaac J. Nijman<sup>1</sup>, David van Enkevort<sup>18</sup>, Hailiang Mei<sup>18</sup>, Vyacheslav Koval<sup>19</sup>, Kai Ye<sup>20,21</sup>, Eric-Wubbo Lameijer<sup>21</sup>, Matthijs H. Moed<sup>21</sup>, Jayne Y. Hehir-Kwa<sup>22</sup>, Robert E. Handsaker<sup>5,23</sup>, Shamil R. Sunyaev<sup>4,5</sup>, Mashaal Sohail<sup>4,5</sup>, Fereydoun Hormozdiani<sup>24</sup>, Tobias Marschall<sup>25</sup>, Alexander Schönhuth<sup>25</sup>, Victor Guryev<sup>26</sup>, Paul I.W. de Bakker<sup>1,3-5</sup> (Co-Chair);

Cohort collection and sample management group: P. Eline Slagboom<sup>21</sup>, Marian B. Beekman<sup>21</sup>, Anton J.M. de Craen<sup>21</sup>, H. Eka D. Suchiman<sup>21</sup>, Albert Hofman<sup>15</sup>, Cornelia van Duijn<sup>15</sup>, Dorret I. Boomsma<sup>9</sup>, Gonneke Willemsen<sup>9</sup>, Bruce H. Wolffenbuttel<sup>27</sup>, Mathieu Platteel<sup>6</sup>, Steven J. Pitts<sup>28</sup>, Shobha Potluri<sup>28</sup>, David R. Cox<sup>28,34</sup>;

Whole-genome sequencing: Qibin Li<sup>29</sup>, Yingrui Li<sup>29</sup>, Yuanping Du<sup>29</sup>, Ruoyan Chen<sup>29</sup>, Hongzhi Cao<sup>29</sup>, Ning Li<sup>30</sup>, Sujie Cao<sup>30</sup>, Jun Wang<sup>29,31,32</sup>;

Ethical, Legal, and Social Issues: Jasper A. Bovenberg<sup>33</sup>;

Steering committee: Cisca Wijmenga<sup>6,7</sup> (Principal Investigator), Morris A. Swertz<sup>6,7</sup>, Cornelia M. van Duijn<sup>15</sup>, Dorret I. Boomsma<sup>9</sup>, P. Eline Slagboom<sup>21</sup>, Gertjan B. van Ommen<sup>11</sup>, Paul I.W. de Bakker<sup>1,3-5</sup>

<sup>1</sup> Department of Medical Genetics, University Medical Center Utrecht, Utrecht, The Netherlands. <sup>2</sup> Department of Computer Science, Columbia University, New York, NY, USA. <sup>3</sup> Department of Epidemiology, University Medical Center Utrecht, Utrecht, The Netherlands. <sup>4</sup> Division of Genetics, Brigham and Women's Hospital, Harvard Medical School, Boston, MA, USA. <sup>5</sup> Broad Institute of Harvard and MIT, Cambridge, MA, USA. <sup>6</sup> Department of Genetics, University Medical Center Groningen, University of Groningen, Groningen, The Netherlands. <sup>7</sup> Genomics Coordination Center, University Medical Center Groningen, University of Groningen, Groningen, The Netherlands. <sup>8</sup> Department of Systems Biology, Columbia University, New York, NY, USA. <sup>9</sup> Department of Biological Psychology, VU University Amsterdam, Amsterdam, The Netherlands. <sup>10</sup> Department of Forensic Molecular Biology, Erasmus Medical Center, Rotterdam, The Netherlands. <sup>11</sup> Leiden Genome Technology Center, Department of Human Genetics, Leiden University Medical Center, Leiden, The Netherlands. <sup>12</sup> Department of Evolutionary Genetics, Max Planck Institute for Evolutionary Anthropology, Leipzig, Germany. <sup>13</sup> Forensic Laboratory for DNA Research, Department of Human Genetics, Leiden University Medical Center, Leiden, The Netherlands. <sup>14</sup> Department of Neurology, University Medical Center Utrecht, Utrecht, The Netherlands. <sup>15</sup> Department of Epidemiology, Erasmus Medical Center, Rotterdam, The Netherlands. <sup>16</sup> Bioinformatics Laboratory, Department of Clinical Epidemiology, Biostatistics and Bioinformatics, Amsterdam Medical Center, Amsterdam, The Netherlands. <sup>17</sup> SURFsara, Science Park, Amsterdam, The Netherlands. <sup>18</sup> Netherlands Bioinformatics Centre, Nijmegen, The Netherlands. <sup>19</sup> Department of Internal Medicine, Erasmus Medical Center, Rotterdam, The Netherlands. <sup>20</sup> The Genome Institute, Washington University, St. Louis, MO, USA. <sup>21</sup> Section of Molecular Epidemiology, Department of Medical Statistics and Bioinformatics, Leiden University Medical Center, Leiden, The Netherlands. <sup>22</sup> Department of Human Genetics, Radboud University Nijmegen Medical Centre, Nijmegen, The Netherlands. <sup>23</sup> Department of Genetics, Harvard Medical School, Boston, MA, USA. <sup>24</sup> Department of Genome Sciences, University of Washington, Seattle, WA, USA. <sup>25</sup> Centrum voor Wiskunde en Informatica, Life Sciences Group, Amsterdam, The Netherlands. <sup>26</sup> European Research Institute for the Biology of Ageing, University Medical Center Groningen, University of Groningen, Groningen, The Netherlands. <sup>27</sup> Department of Endocrinology, University Medical Center Groningen, Groningen, The Netherlands. <sup>28</sup> Rinat-Pfizer Inc, South San Francisco, CA, USA. <sup>29</sup> BGI-Shenzhen, Shenzhen, China. <sup>30</sup> BGI-Europe, Copenhagen, Denmark. <sup>31</sup> Department of Biology, University of Copenhagen, Copenhagen, Denmark. <sup>32</sup> The Novo Nordisk Foundation Center for Basic Metabolic Research, University of Copenhagen, Copenhagen, Denmark. <sup>33</sup> Legal Pathways Institute for Health and Bio Law, Aardenhout, The Netherlands. <sup>34</sup> Deceased.

## ***CHARGE lipids Working Group.***

Aaron Isaacs, Adrienne Cupples, Alanna C Morrison, Albert Hofman, Albert Smith, Alex Reiner, Ani Manichaikul, Aniko Sabo, Aron Y Joon, Audrey Chu, Ayse Demirkan, Bruce Psaty, Camille Breaux, Charles Kooperberg, Chris Carlson, Chris O'Donnell, Chunyu Liu, Cornelia van Duijn, Daniel Chasman, Elisabeth van Leeuwen, Eric Boerwinkle, Gail Davies, Gina M Peloso, Gudny Eiriksdottir, Hao Mei, Ian Deary, Ida Chen, Ingrid Borecki, Jacy R Crosby, James G. Wilson, Jari Lahti, Jeanette Andrews, Jeff O'Connell, Jennifer Brody, Jennifer Huffman, Jennifer Robinson, Jennifer Smith, Jerome

Rotter, Johanna Jakobsdottir, Jose Ordovas, Josh Bis, Kelli Ryckman, Ken Rice, Kurt Lohman,  
Lawrence Bielak, Leslie Lange, Lindsay Reynolds, Marcia Lobos, Mary Feitosa, Myriam Fornage,  
Paul Auer, Rachel Mackey, Rebecca Jackson, Sekar Kathiresan, Serkalem Demissie, Stephen Rich,  
Tamara Harris, Tarun Ahluwalia, Vilmundur Gudnason, Wei Peng and Yongmei Liu

## Supplementary Methods.

### *Study descriptions.*

#### **Discovery cohorts.**

**Erasmus Rucphen Family (ERF) Study.** The ERF study has been described in detail previously<sup>[3]</sup>. A total of approximately 3,000 participants descend from 22 couples who lived in the Rucphen region in The Netherlands in the 19th century. The 2,755 individuals with genotype data and lipid measurements were included in the current analysis.

**Lifelines.** LifeLines<sup>[4]</sup> is a multi-disciplinary prospective population-based cohort study examining in a unique three-generation design the health and health-related behaviours of 165,000 persons living in the North East region of The Netherlands. It employs a broad range of investigative procedures in assessing the biomedical, socio-demographic, behavioural, physical and psychological factors which contribute to the health and disease of the general population, with a special focus on multimorbidity and complex genetics. This study only includes the individuals of which both genotype and lipid measurements was available.

**Leiden Longevity Study (LLS).** The LLS has been designed to investigate biomarkers of healthy ageing and longevity<sup>[5]</sup> and has been described in detail previously<sup>[6]</sup>. It is a family-based study consisting of 1,671 offspring of 421 nonagenarian sibling pairs of Dutch descent, and their 744 partners.

**Netherlands Twin Register and Netherlands Study of Depression and Anxiety (NTR-NESDA).** The sample used in the analyses in this study consisted of 5,764 participants of the Netherlands Twin Register (NTR). NTR participants are ascertained because of the presence of twins or triplets in the family and consist of multiples, their parents, siblings and spouses. Twins are born in all strata of society and NTR represents a general sample from the Dutch population. Age ranged between 12 and 89 (median 39), and 62.4% was female<sup>[7,8]</sup>.

The other 1,816 samples originated from the NESDA cohort with available phenotype data. NESDA is a longitudinal study focusing on the course and consequences of depression and anxiety disorders. Subjects for NESDA were recruited from three sources, namely the general population, mental health organizations and general practices. The vast majority of NESDA subjects is selected for depression and anxiety, but the sample also includes healthy controls without lifetime psychiatric disorders. Age ranged between 18 and 65 in NESDA (median 43), and the proportion of females was 66.1%<sup>[9]</sup>. For all analysis, we excluded one monozygotic twin per pair. Additional corrections for

family resemblance are analysis specific, and described where appropriate. Lipids were measured from fasting blood samples following standard protocols as described in Willemssen *et al.*<sup>[8,10]</sup>.

**Prevention of Renal and Vascular End stage Disease study (PREVEND).** This is an ongoing prospective study investigating the natural course of increased levels of urinary albumin excretion and its relation to renal and cardiovascular disease. Details of the protocol have been described elsewhere<sup>[11]</sup> ([www.prevend.org](http://www.prevend.org)). Blood samples were obtained in the morning hours. Red blood cell measurements were performed at the 2nd visit (about 4.2 years from baseline).

**Prospective Study of Pravastatin in the Elderly at Risk (PROSPER).** A detailed description of the study has been published elsewhere<sup>[12-14]</sup>. PROSPER was a prospective multicenter randomized placebo-controlled trial to assess whether treatment with pravastatin diminishes the risk of major vascular events in elderly. Between December 1997 and May 1999, we screened and enrolled subjects in Scotland (Glasgow), Ireland (Cork), and the Netherlands (Leiden). Men and women aged 70-82 years were recruited if they had pre-existing vascular disease or increased risk of such disease because of smoking, hypertension, or diabetes. A total number of 5,804 subjects were randomly assigned to pravastatin or placebo. A large number of prospective tests were performed including Biobank tests and cognitive function measurements. A whole genome wide screening has been performed in the sequential PHASE project with the use of the Illumina 660K beadchip. Of 5,763 subjects DNA was available for genotyping. Only the Dutch samples were used for the discovery phase of this study (PROSPER-Dutch).

**Rotterdam Study cohort I (RS-I).** The Rotterdam Study is an ongoing prospective population-based cohort study, focused on chronic disabling conditions of the elderly. The study comprises an outbred ethnically homogenous population of Dutch Caucasian origin. The rationale of the study has been described in detail elsewhere<sup>[15]</sup>. In summary, 7,983 men and women aged 55 years or older, living in Ommoord, a suburb of Rotterdam, the Netherlands, were invited to participate in the first phase. Fasting blood samples were taken during the participant's third visit to the research center.

**Rotterdam Study cohort II (RS-II).** The Rotterdam Study cohort II prospective population-based cohort study comprises 3,011 residents aged 55 years and older from the same district of Rotterdam. The rationale and study designs of this cohort is similar to that of the RS-I<sup>[15]</sup>. The baseline measurements, including the fasting HDL measurements, took place during the first visit.

**Rotterdam Study cohort III (RS-III).** The Rotterdam Study cohort III prospective population-based cohort study comprised 3,932 residents aged 45 years and older from the same district of Rotterdam. The rationale and study designs of this cohort is similar to that of the RS-I<sup>[15]</sup>. The baseline measurements, including the fasting HDL measurements, took place during the first visit.

## **Replication cohorts.**

**Cardiovascular Health Study (CHS).** The CHS is a population-based cohort study of risk factors for CHD and stroke in adults greater than or equal to 65 years years conducted across four field centers<sup>[16]</sup>. The original predominantly Caucasian cohort of 5,201 persons was recruited in 1989-1990 from random samples of the Medicare eligibility lists; subsequently, an additional predominantly African-American cohort of 687 persons were enrolled for a total sample of 5,888. DNA was extracted from blood samples drawn on all participants at their baseline examination in 1989-1990. In 2007-2008, genotyping was performed at the General Clinical Research Center's Phenotyping/Genotyping Laboratory at Cedars-Sinai using the Illumina 370CNV BeadChip system on 3,980 CHS participants who were free of CVD at baseline, consented to genetic testing, and had DNA available for genotyping.

CHS was approved by institutional review committees at each site, the subjects gave informed consent, and those included in the present analysis consented to the use of their genetic information for the study of cardiovascular disease.

**CROATIA-Korcula, CROATIA-Split and CROATIA-Vis.** The CROATIA-Vis study includes unselected adult participants who were recruited in a population-based study during 2003 and 2004 in the villages of Vis and Komiza on the Dalmatian island of Vis. All subjects visited the clinical research centre in the region where they were examined in person and where fasting blood was drawn. Biochemical and physiological measurements were performed, detailed genealogies reconstructed, questionnaire of lifestyle and environmental exposures collected, and blood samples stored for further analyses. CROATIA-Korcula participants were recruited in the same manner from the Dalmatian island of Korcula in 2007 and CROATIA-Split from the mainland Croatian city of Split in 2009-2010. All studies received appropriate ethical approval, and all participants gave informed consent.

**Family Heart Study (FamHS).** The collection of phenotypes and covariates as well as clinical examination have been previously described for the Family Heart Study<sup>[17]</sup>. In brief, the FamHS began in 1992 with the ascertainment of 1,200 families, half randomly sampled and half selected because of an excess of coronary heart disease (CHD) or risk factor abnormalities as compared with age- and sex-specific population rates. The families, with approximately 6,000 subjects, were sampled from four population-based parent studies: the Framingham Heart Study, the Utah Family Tree Study, and two centers for the Atherosclerosis Risk in Communities study (ARIC: Minneapolis, and Forsyth County, NC). The participants attended a clinic visit between the years 1994-1996 and a broad range of

phenotypes was assessed in the general domains of CHD, atherosclerosis, cardiac and vascular function, inflammation and hemostasis, lipids and lipoproteins, blood pressure, diabetes and insulin resistance, pulmonary function, diet, habitual physical activity, anthropometry, medical history and medication use. Approximately 8 years later, 2,756 European American (EA) subjects belonging to the 510 of the largest and most informative pedigrees were invited for a second clinical exam (2002-2004). The most important CHD risk factors were measured again, including lipids, parameters of glucose metabolism, blood pressure, anthropometry, and several biochemical and hematologic markers. In addition, a computed tomography examination provided measures of coronary and aortic calcification, and abdominal and liver fat burden. Medical history and medication use was updated. A total of 3,794 EA subjects, from the first clinic visit, participated in the current study.

**Framingham Heart Study (FHS).** The FHS funded by the National Heart Lung and Blood Institute, is an observational population-based cohort study composed of three generations of Framingham (MA) residents predominately of European descent. The Original cohort (N = 5,209) was enrolled in 1948. The children and spouses of the Original cohort comprise the Offspring cohort (N = 5,124), which was enrolled in 1971-1975<sup>[18]</sup>. The Third Generation (N = 4,095) consists mostly of the children of the Offspring cohort, and was enrolled in 2002 to 2005<sup>[19]</sup>. All participants were examined every 4-8 years. DNA for surviving participants was collected in the late 1990s and early 2000s (1995-2005). Cholesterol and genetic data from 3,464 Offspring subjects and 3,569 Third Generation subjects contribute to this paper.

**Generation Scotland (GS).** The Generation Scotland: Scottish Family Health Study (GS:SFHS) is a collaboration between the Scottish Universities and the NHS, funded by the Chief Scientist Office of the Scottish Government. GS:SFHS is a family-based genetic epidemiology cohort with DNA, other biological samples (serum, urine and cryopreserved whole blood) and socio-demographic and clinical data from ~24,000 volunteers, aged 18-98 years, in ~7,000 family groups. Participants were recruited across Scotland, with some family members from further afield, from 2006-2011. Most (87%) participants were born in Scotland and 96% in the United Kingdom or Ireland. The cohort profile has been published<sup>[20]</sup>. GS:SFHS operates under appropriate ethical approvals, and all participants gave written informed consent.

**Multi-Ethnic Study of Atherosclerosis (MESA Whites).** MESA is a study of the characteristics of subclinical cardiovascular disease (disease detected non-invasively before it has produced clinical signs and symptoms) and the risk factors that predict progression to clinically overt cardiovascular disease or progression of the subclinical disease. MESA researchers study a diverse, population-based sample of 6,814 asymptomatic men and women aged 45-84. Thirty-eight percent of



the recruited participants are white, 28% African-American, 22% Hispanic, and 12% Asian, predominantly of Chinese descent, as well as 2,128 additional individuals from 594 families recruited through MESA Family by utilizing the existing MESA framework, yielding 3,026 sibpairs divided between African Americans and Hispanic-Americans. Participants were recruited from six field centers across the United States: Wake Forest University, Columbia University, Johns Hopkins University, University of Minnesota, Northwestern University and University of California - Los Angeles. For current investigation, analysis of the MESA cohort was restricted to those participants who self-identified as White.

**Orkney Complex Disease studies (ORCADES).** The ORCADES is a family-based, cross-sectional community study of the genetics of complex traits, based in the Orkney Isles in Scotland<sup>[21]</sup>.

**Prospective Study of Pravastatin in the Elderly at Risk (PROSPER).** For the replication only the Scottish (PROSPER-Scottish) and the Irish (PROSPER-Irish) samples of the PROSPER study were used. The full description of PROSPER can be found at the section of the discovery cohorts.

## ***Genotyping and imputations.***

### **Discovery cohorts.**

In ERF genotyping was done on various Illumina and Affymetrix chips. QC was done separately for each chip. For most chips, the following QC criteria were applied: callrate  $> 0.98$ , per individual callrate  $> 0.96$ , Hardy-Weinberg equilibrium (HWE)  $p$ -value  $> 5 \cdot 10^{-8}$  and minor allele frequency (MAF)  $> 0.005$ . IBS checks, sex chromosome checks and ethnicity checks were also performed. The imputation to the Genome of the Netherlands reference panel, release 4 was performed with MaCH (1.0.18c) and Minimac (minimac-beta-2012-03-14).

The genotyping in Lifelines was done with the Illumina Human CytoSNP12 array. The following QC was applied after genotyping: HWE  $\leq 0.0001$ , MAF  $< 0.01$ , callrate  $< 0.95$ . If the SNP is not present in the reference data set, has null alleles and/or has an allele frequency which is comparable to the reference ( $> 25\%$  difference), the SNP is excluded prior to imputations. The imputation to the Genome of the Netherlands reference panel, release 4 was performed with MaCH (1.0.17) and Minimac (minimac-beta-2012.10.3).

The genotyping in LLS was done with the Illumina Human 660\_Quad and the Illumina OmniExpress. The following exclusion criteria were applied: sample call rate  $< 0.95$ , SNP call rate  $< 0.95$ , HWE  $p$ -value  $< 1 \cdot 10^{-4}$  and MAF  $< 0.01$ . The imputation to the Genome of the Netherlands

reference panel, release 4 was performed with IMPUTE version 2.2.

Genotyping in the NTR and NESDA samples was done on multiple platforms for partly overlapping subsets of the total sample (Affymetrix, Santa Clara, CA, USA; Perlegen 5.0, Mountain View, CA, USA; Illumina 370, San Diego, CA, USA; Illumina 660, Illumina Omni Express 1 M and Affymetrix 6.0). Quality control was done within as well as between platforms. Imputation was done using MaCH (version 1.0.18) and Minimac (version 2012.10.9 beta) using the GoNL reference panel release 4.1. SNP removal criteria included  $MAF < 0.01$ , HWE  $p$ -value  $< 1 \cdot 10^{-5}$  and call rate  $< 0.95$ . Samples were excluded in case of sex mismatch, genotype missing rate  $> 0.1$  or Plink F inbreeding value was either  $> 0.10$  or  $< -0.10$  (heterozygosity). On the merged data, the HWE and MAF SNP filters were reapplied, as well as an imputation quality cutoff  $R^2 < 0.30$ .

Genotyping for PREVEND was performed on the Illumina CytoSNP12 v2 chip. Samples exclusions based on call rates  $< 0.95$ , gender mismatch, duplicate discordance and genetic similarity. Population stratification was assessed by principal component analysis (PCA) over the sample correlation matrix, based on 16,842 independent (LD-pruned) SNPs. Samples were excluded when for they diverged from the mean with at least 3 standard deviations ( $Z$ -score  $> 3$ ) for the first 5 principal components. SNPs were excluded with a MAF of  $< 0.01$ , call rate  $< 0.95$ , or deviation from HWE ( $p$ -value  $< 1 \cdot 10^{-5}$ ). The imputation to the Genome of the Netherlands reference panel, release 4 was performed with MaCH (1.0.18) and Minimac (2012.10.3) after the genome positions were converted from hg18 to hg19 using the UCSC LiftOver tool ([http://hgdownload.cse.ucsc.edu/admin/exe/linux.x86\\_64/liftOver](http://hgdownload.cse.ucsc.edu/admin/exe/linux.x86_64/liftOver)).

The genotyping in PROSPER-Dutch was done with Illumina Human 660\_Quadv1. The following exclusion criteria were applied: SNP call rate  $< 0.95$ , MAF  $< 0.01$ , HWE  $p$ -value  $< 1 \cdot 10^{-4}$  and sample call rate  $< 0.95$ . The imputation to the Genome of the Netherlands reference panel, release 4 was performed with IMPUTE version 2.2. The genotyping, QC and imputations of PROSPER-Dutch was done together with the samples of PROSPER-Scottish and PROSPER-Irish.

The first two cohorts of the Rotterdam Study were genotyped using the Illumina 550K chip, the third cohort was genotyped using the Illumina 610K and 660K chip. The following exclusions were applied to identify a final set of SNPs that was used in this study: MAF  $< 0.05$ , SNP callrate  $< 0.95$  and/or HWE  $p$ -value  $< 1 \cdot 10^{-7}$ . The QC was done per cohort. Imputation per cohort to the Genome of the Netherlands reference panel, release 4 was performed with MaCH and Minimac.

## Replication cohorts.

In CHS both genotyped (rs4752801) and imputed SNPs (rs149580368, rs77542162 and rs117162033) were used for the replication. In CHS, genotyping was performed at the General Clinical Research Center's Phenotyping/Genotyping Laboratory at Cedars-Sinai using the Illumina 370CNV BeadChip system. Genotypes were called using the Illumina BeadStudio software. The following exclusions were applied to identify a final set of 306,655 autosomal SNPs: SNP call rate  $< 0.97$ , HWE  $p$ -value  $< 1 \cdot 10^{-5}$ , more than 2 duplicate errors or Mendelian inconsistencies (for reference CEPH trios), heterozygote frequency equal to 0, SNP not found in HapMap and sample call rate  $< 0.95$ . For the 3,271 white participants in this study, the cleaned genotypes from the Illumina CNV370 were merged with genotypes from ITMAT-Broad-CARe (IBC) Illumina iSELECT chip. The IBC chip contained 46,423 markers on a subset of 2861 participants. The genotypes from the two chips were merged into a final set of 359,592 unique SNPs and then updated to hg19 position using plink. MaCH was used to pre-phase the genotypes. The phased genotypes were imputed into a reference panel of 1,092 individual of multiple ethnicities from the Phase1 version3 haplotypes of 1000 Genomes project using Minimac. The final number of imputed SNPs on the autosomes was 38,050,714.

In CROATIA-Korcula, CROATIA-Split and CROATIA-Vis only imputed SNPs were used for the replication. Both CROATIA-Korcula and CROATIA-Split were genotyped with the Illumina HumanHap370CNV chip, the CROATIA-Vis was genotyped with the Illumina HumanHap300v1 chip. The QC applied prior to imputations was: individuals call rate: 0.97, SNP call rate: 0.98, MAF cutoff: 0.01, HWE  $p$ -value cutoff:  $1 \cdot 10^{-6}$  and inbreeding coefficient: 0.2-0.8. Imputation per cohort to the 1000 Genomes project reference panel (version Phase 1 integrated release v3, april 2012, all populations) was performed with SHAPEIT2 and IMPUTE2.

In FamHS rs4752801 was genotyped, the other replication SNPs were imputed. The FamHS participants were genotyped on three Illumina platforms (HumMap550K, Human 6100-Quadv1, or Human 1M-Duov3). Quality control was performed before imputation and included assessment of Mendelian errors<sup>[22]</sup> and verification of reported pedigree relationships using GRR<sup>[23]</sup>. For the 1000 Genome reference panel imputation, SNPs were used if: call rate  $> 0.98$ ; MAF  $> 0.01$ ; no deviation from HWE  $p$ -value  $> 1 \cdot 10^{-6}$ , allelic match with 1000 Genomes; and present in 1000 Genome reference panel genotyping. A total of 501,404 (550K), 530,979 (610K-Quadv1), and 910,456 (1M-Duov3) SNPs were included for the haplotype phasing and imputation using MaCH (version 1.0.16<sup>[24,25]</sup>). The reference phased haplotypes were the Cosmopolitan panel (including all races-version 2010-11 data freeze, 2012-03-04 haplotypes). The number of imputed gene dosages was about 38

million for EA subjects. To create the hybrid dataset, genotyped SNPs were strand oriented to the HapMap + strand. The original genotypes were converted to dosages. Genotyped SNPs were excluded from the hybrid dataset if a genotyped SNP was not in dbSNP or the mldose file from the 1000 Genome reference panel imputation. SNPs that were mapped to more than one location in the genome were excluded. Imputed gene dosages were used in the hybrid dataset for any genotyped SNP with a call rate  $< 0.98$  or a MAF  $< 0.01$ . For the remaining genotyped SNPs common to all three genotyping platforms, genotyped dosage data was merged over imputed data in the mldose file whenever the measured genotype was available, with missing genotyped data kept as missing in the hybrid dataset and monomorphic SNPs removed. This process led to a hybrid dataset with 36,545,314 SNPs, of which 519,261 SNPs were genotyped and 36,026,053 SNPs were imputed.

In FHS only imputed SNPs were used for the replication. Samples of the FHS were genotyped with Affymetrix 250K Nsp and 250K Sty mapping arrays and the Affymetrix 50K supplemental gene-focused array. The QC criteria for variants used in the imputations was: HWE  $p$ -value  $< 1 \cdot 10^{-7}$ , call rate  $< 0.969$ , MAF  $< 0.005$  and Mendelian errors  $< 1000$ . Imputation to the 1000 Genomes project reference panel (version Phase 1 integrated release v3, april 2012, all populations) was performed with MaCH (version 1.0.15).

In Generation Scotland only imputed SNPs were used for the replication. The samples were genotyped with the OMNI Express chip and with the Illumina HumanExome array. The QC criteria for variants on the OMNI express were: individual call rate 0.98, SNP call rate 0.98, MAF 0.01 and HWE  $p$ -value  $1 \cdot 10^{-6}$ . The QC criteria for variants on the Exome array were: individual call rate 0.99, SNP call rate 0.98, MAF 0.0001 and HWE  $p$ -value  $1 \cdot 10^{-6}$ . Prior to imputations both data sets were merged. Imputation to the 1000 Genomes project reference panel (version Phase 1 integrated release v3, april 2012, all populations) was performed with SHAPEIT and IMPUTE2.

In MESA Whites and MESA Family only imputed SNPs were used for the replication. MESA Whites and MESA Family samples were genotyped using the Affymetrix Genome-Wide Human SNP Array 6.0 (Santa Clara, California); for the current meta-analysis only self-reported Caucasian participants were analyzed. Sample exclusion criteria included heterozygosity  $> 0.53$  and individual-level genotyping callrate  $< 0.95$ . Monomorphic SNPs were removed, and there was no filter on HWE or MAF. IMPUTE version 2.2.2 was used to perform imputation for the MESA SHARe Caucasian participants (chromosomes 1-23) using the 1000 Genomes haplotypes release Phase I integrated variant set (NCBI build 37, hg19) based on data freezes from 23 Nov 2010 (low-coverage whole-genome) and 21 May 2011 (high-coverage exome); phased haplotypes released March 2012 (v3).

In ORCADES only imputed SNPs were used for the replication. 890 samples of the ORCADES

cohort were genotyped with the Illumina Hap300 chip. The QC criteria for variants used in the imputations were: call rate  $< 0.97$ , FDR  $> 0.01$ , ethnic outliers, duplicates, gender mismatch, excess IBS incompatible with pedigree, MAF  $< 0.01$  and HWE  $p$ -value  $< 1 \cdot 10^{-6}$ . Imputations to the 1000 Genomes project reference panel (version Phase 1 integrated release v3, april 2012, all populations) was performed with SHAPEIT (version 2, r644) and IMPUTE2 (version 2.2.2). 304 samples of the ORCADES cohort were genotyped with the Illumina Omni1 chip and an additional 1,073 samples were genotyped with the Illumina OmniX. QC exclusion criteria for variants genotyped with these chips prior to the imputations were: call rate  $< 0.97$ , ethnic outliers, duplicates, gender mismatch, excess IBS incompatible with pedigree, monomorphic SNPs and HWE  $p$ -value  $< 1 \cdot 10^{-6}$ . Data from both SNP arrays was merged after QC prior to the imputations. Imputations to the 1000 Genomes project reference panel (version Phase 1 integrated release v3, april 2012, all populations) was performed with SHAPEIT (version 2, r644) and IMPUTE2 (version 2.2.2).

In PROSPER-Scottish and PROSPER-Irish both imputed and genotyped SNPs were used for the replication. The genotyping in these cohorts was done with Illumina Human 660\_Quadv1. The following exclusion criteria were applied: SNP call rate  $< 0.95$ , MAF  $< 0.01$ , HWE  $p$ -value  $< 1 \cdot 10^{-4}$  and sample call rate  $< 0.95$ . The imputation to the 1000 Genomes project reference panel (version Phase 1 integrated release v3, april 2012, all populations) was performed with IMPUTE version 2.2. The genotyping, QC and imputations of these cohorts was done together with the samples of PROSPER-Dutch.

## Supplementary References.

- [1] Teslovich, T. M. *et al.* Biological, clinical and population relevance of 95 loci for blood lipids. *Nature* **466**, 707–713 (2010).
- [2] Consortium, G. L. G. *et al.* Discovery and refinement of loci associated with lipid levels. *Nat Genet* **45**, 1274–1283 (2013).
- [3] Pardo, L. M., MacKay, I., Oostra, B., van Duijn, C. M. & Aulchenko, Y. S. The effect of genetic drift in a young genetically isolated population. *Ann Hum Genet* **69**, 288–295 (2005).
- [4] Stolck, R. P. *et al.* Universal risk factors for multifactorial diseases: LifeLines: a three-generation population-based study. *Eur J Epidemiol* **23**, 67–74 (2008).
- [5] Westendorp, R. G. J. *et al.* Nonagenarian siblings and their offspring display lower risk of mortality and morbidity than sporadic nonagenarians: The Leiden Longevity Study. *J Am Geriatr Soc* **57**, 1634–1637 (2009).
- [6] Schoenmaker, M. *et al.* Evidence of genetic enrichment for exceptional survival using a family approach: the Leiden Longevity Study. *Eur J Hum Genet* **14**, 79–84 (2006).
- [7] Boomsma, D. I. *et al.* Netherlands Twin Register: from twins to twin families. *Twin Res Hum Genet* **9**, 849–857 (2006).
- [8] Willemsen, G. *et al.* The Netherlands Twin Register biobank: a resource for genetic epidemiological studies. *Twin Res Hum Genet* **13**, 231–245 (2010).
- [9] Penninx, B. W. J. H. *et al.* The Netherlands Study of Depression and Anxiety (NESDA): rationale, objectives and methods. *Int J Methods Psychiatr Res* **17**, 121–140 (2008).
- [10] van Reedt Dortland, A. K. B. *et al.* Associations between serum lipids and major depressive disorder: results from the Netherlands Study of Depression and Anxiety (NESDA). *J Clin Psychiatry* **71**, 729–736 (2010).
- [11] Hillege, H. L. *et al.* Microalbuminuria is common, also in a nondiabetic, nonhypertensive population, and an independent indicator of cardiovascular risk factors and cardiovascular morbidity. *J Intern Med* **249**, 519–526 (2001).
- [12] Shepherd, J. *et al.* The design of a prospective study of Pravastatin in the Elderly at Risk (PROSPER). PROSPER Study Group. PROspective Study of Pravastatin in the Elderly at Risk. *Am J Cardiol* **84**, 1192–1197 (1999).
- [13] Shepherd, J. *et al.* Pravastatin in elderly individuals at risk of vascular disease (PROSPER): a randomised controlled trial. *Lancet* **360**, 1623–1630 (2002).

- [14] Trompet, S. *et al.* Replication of LDL GWAs hits in PROSPER/PHASE as validation for future (pharmaco)genetic analyses. *BMC Med Genet* **12**, 131 (2011).
- [15] Hofman, A. *et al.* The Rotterdam Study: 2012 objectives and design update. *Eur J Epidemiol* **26**, 657–686 (2011).
- [16] Fried, L. P. *et al.* The Cardiovascular Health Study: design and rationale. *Ann Epidemiol* **1**, 263–276 (1991).
- [17] Higgins, M. *et al.* NHLBI Family Heart Study: objectives and design. *Am J Epidemiol* **143**, 1219–1228 (1996).
- [18] Kannel, W. B., Feinleib, M., McNamara, P. M., Garrison, R. J. & Castelli, W. P. An investigation of coronary heart disease in families. The Framingham offspring study. *Am J Epidemiol* **110**, 281–290 (1979).
- [19] Splansky, G. L. *et al.* The Third Generation Cohort of the National Heart, Lung, and Blood Institute’s Framingham Heart Study: design, recruitment, and initial examination. *Am J Epidemiol* **165**, 1328–1335 (2007).
- [20] Smith, B. H. *et al.* Cohort Profile: Generation Scotland: Scottish Family Health Study (GS:SFHS). The study, its participants and their potential for genetic research on health and illness. *Int J Epidemiol* **42**, 689–700 (2013).
- [21] McQuillan, R. *et al.* Runs of homozygosity in European populations. *Am J Hum Genet* **83**, 359–372 (2008).
- [22] Heath, S. C. Markov chain Monte Carlo segregation and linkage analysis for oligogenic models. *Am J Hum Genet* **61**, 748–760 (1997).
- [23] Abecasis, G. R., Cherny, S. S., Cookson, W. O. & Cardon, L. R. GRR: graphical representation of relationship errors. *Bioinformatics* **17**, 742–743 (2001).
- [24] Li, Y., Willer, C., Sanna, S. & Abecasis, G. Genotype imputation. *Annu Rev Genomics Hum Genet* **10**, 387–406 (2009).
- [25] Li, Y., Willer, C. J., Ding, J., Scheet, P. & Abecasis, G. MaCH: using sequence and genotype data to estimate haplotypes and unobserved genotypes. *Genet Epidemiol* **34**, 816–834 (2010).
